# Supplementary material for: Rules of amino acid convergence: Not how many, but who in avian vocal learning clades
Source: Research Square preprint supplement (doi:10.21203/rs.3.rs-100389/v1), 2020-11-09
Supplement: Supplementary file 4 [file a79f2733f5022e2b2e1128f3.xlsx]

## Sheet: Supplementary_Data_1
Gene	Symbol	AA position in MSA	AA of vocal learners	AA of vocal non-learners	Pvalue_AA	Adj.pvalue_AA	Target_Entropy_AA	Others_Entropy_AA	Type_CSAV	identical or different CSAV	Zebra Finch	Medium Ground-finch	American Crow	Budgerigar	Kea	Anna's Hummingbird	Golden-collared Manakin	Peregrine Falcon	Red-legged Seriema	Carmine Bee-eater	Downy Woodpecker	Rhinoceros Hornbill	Bar-tailed Trogon	Cuckoo Roller	Speckled Mousebird	Barn Owl	Bald Eagle	White-tailed Eagle	Turkey Vulture	Dalmatian Pelican	Little Egret	Crested Ibis	Cormorant	Northern Fulmar	Adelie Penguin	Emperor Penguin	Red-throated Loon	White-tailed Tropicbird	Sunbittern	Killdeer	Grey Crowned Crane	Hoatzin	Chimney Swift	Chuck-will's-widow (Nightjar)	Houbara Bustard	Red-crested Turaco	Common Cuckoo	Brown Mesite	Yellow-throated Sandgrouse
14431	ABCG2	330	ALT	EIKRV	1.41662e-07	0.000268166	1.45915	1.13237	4	dCSAV	L	L	L	A	T	A	V	V	V		V	V	V	V	K	I	V	V	I	V	I	V	E	V	V	V	V	V	V	I	V	V	V	I		V	V		V
9788	ACP2	148	DQ	AEG	9.31309e-08	0.000119021	0.650022	0.898295	4	dCSAV	D	D	D	D	D	Q	E	A	E	E	E	E	E	A	E	E	E	E	E	E	E	E	E	E	E	E	E	E	E	E	E	E	A	E	E	E	E	E	E
1760	AKAP1	55	QRS	-DGHKN	1.90629e-07	0.000544437	1.45915	1.53517	4	dCSAV	S	S	S	Q	Q	R	-	N	N	N	K	-	N	N	-	N	N	N		N	N	D	G	N	N	N	D	N		N	-	N	K	H	N	N	N
7598	ALKBH4	195	SW	ACFLPY	1.22774e-07	0.00011418	0.650022	0.850178	4	dCSAV	S	S	S	S	S	W	F	F	F		A	F	L	F	F	Y	F	F	F	F	F	F	F	F	F	F	F	F	C	F	F	F	P	F	F	F	F		F
3703	ALPK1	684	CNV	-ADGS	9.20804e-07	0.00363257	1.37095	1.39074	4	dCSAV	C	C	C		N	V	G	D	D	G	D	D	G	D	D	D	D	D	D	-	D	D	G	G	D	D	D	A		-	D	D	S	G	D	D	D	D	D
6455	ANKFN1	235	AV	-GLM	8.18492e-07	0.00188089	0.721928	0.828712	4	dCSAV		A	V	V	V	V	G	M	M	L	M	M	M	M	M	M	M	M	M	M	M	M	-	M	M	M	M	M	M	M	M	M	M	-	M	M	M	M	M
2601	ANKRD16	234	AGS	-DN	1.6403e-07	0.000185518	1.25163	1.39951	4	dCSAV	G	G	G	S	G	A	D	N	N		D	D	N	-	N	D	N	N	-	N	N	N	-	N	N	N	N	N	D	N	N	D	D	-	D		N		D
956	ARMC6	53	-P	Q	9.31309e-08	0.000132991	0.650022	0	3	dCSAV	-	P	P	P	P	P	Q	Q	Q	Q	Q	Q	Q	Q	Q	Q	Q	Q	Q	Q	Q	Q	Q	Q	Q	Q	Q	Q	Q	Q	Q	Q	Q	Q	Q	Q	Q	Q	Q
11966	ASH1L	61	DS	-NR	1.90629e-07	0.00174883	1	0.758359	4	dCSAV	S	S	S	D	D	D	N	N	N	N	R		-	-	N	N	N	N	-	N	N	N		N	N	N	N	-	N	N	N	N	N		N	-	N		N
10050	B3GNT2	253	N	H	9.31309e-08	0.000110919	0	0	1	iCSAV	N	N	N	N	N	N	H	H	H	H	H	H	H	H	H	H	H	H	H	H	H	H	H	H	H	H	H	H	H	H	H	H	H	H	H	H	H	H	H
8939	BIRC7	11	MP	-AILSTV	9.31309e-08	9.33172e-05	0.918296	2.27052	4	dCSAV	P	P	P	P	M	M	T	V	T	A	I	I	I	A	-	T	T	T	I	I	V	T	T	I	L	L	I	T	S	A	I	T	T	T	A	L	A	T	A
3367	BMP2K	352	-A	NPT	8.18492e-07	0.00289501	0.721928	0.453184	4	dCSAV	-	A	A	A		A	T	T	T	T	T	T	T	T		T	T	T	T	T	T	T	T	T	T	T	T	T	T	T	T	T	T	T	T	T	T	T	T
12969	BRCA2	422	-GKRS	AD	9.31309e-08	0.000974801	2.25163	0.281194	4	dCSAV	S	G	R	-	-	K	A	D	D	D	D	D	D	D	D	D	D	D	D	D	D	D	D	D	D	D	D	D	D	D	D	D	D	D	D	D	D	D	D
6562	BRIP1	915	GT	-AFIV	1.22774e-07	0.000481028	1	1.11318	4	dCSAV	G	G	G	T	T	T	A	I	I	I	I	-	I	-	I	F	I		I	I	I	I	I	I	I	I	-	I	-	I		I	I	I	I	I	I	I	-
11516	C12orf35	170	GHPY	EKQ	1.41662e-07	0.000696977	1.79248	0.731884	4	dCSAV	P	P	P	Y	H	G	Q	Q	E	Q	Q	Q	Q	Q	Q	Q	Q	Q	Q	Q	Q	Q	Q	Q	Q	Q	Q	Q	Q	Q	Q	Q	K	Q	Q		Q		E
11516	C12orf35	604	-R	EG	1.41662e-07	0.000696977	0.650022	0.485461	4	dCSAV	-	-	-	-	-	R	E	G	G	G	G	G	E	G	E	G	G	G	G	G	G	G	G	G	G	G	G	G	G	G	G	G	E	G	G		G		G
11002	C12orf55	315	-DW	CFHQSY	1.3344e-06	0.00288632	1.37095	1.84358	4	dCSAV	-	-	-	D		W	S	Y	C	Y	Y	H	Q	Y	S	Y	F	F			C	Y		Y	C	C		Y	Y	Y	Y	Y	Y	Y	C	Y	C	S	H
2268	C3orf67	427	DHNRT	-IKLPV	1.03886e-06	0.00226886	2.32193	1.83943	4	dCSAV		H	T	D	R	N	-	K		-	V	-	-	-	-	-	I	I	I	I	K	-	L	-	-	I	I	-	-	-	-	-	-	-		-	L	L	P
3357	C8B	490	L	-FV	7.29526e-07	0.00131971	0	0.695734	2	iCSAV	L	L	L	L		L	F	F	F	F	F	F	F	F	F	F	F	F	-	F	F	F	F	-	F	F	F	F	F	F	F	F	V	F	-	-	F	-	F
14197	C9ORF152	53	FMTV	KL	1.0676e-07	6.05328e-05	1.79248	0.168661	4	dCSAV	T	M	V	F	F	F	K	L	L	L	L	L	L	L	L	L		L	L	L	L	L	L	L	L	L	L	L	L	L	L	L	L	L	L	L	L	L	L
8783	CCDC13	216	AKP	-RT	1.41662e-07	0.00016192	1.45915	0.656743	4	dCSAV	A	A	A	K	K	P	R	T	-	-	T	T			-	T	T	T	T	T	T	T	T	T	T	T	T	T	T	T	T	T	T	T	T	T	T		T
8445	CCDC69	44	DES	-HKNT	1.41662e-07	5.86481e-05	1.45915	1.31738	4	dCSAV	E	E	E	D	D	S	H	N	N	N	N	-	N	N	T	N	N	-	N	N	N	N	N	N	N	N	N		N	N	N	N	N	N	K	N	N	N
13897	CD86	91	NPTV	DEHK	1.22774e-07	7.80841e-05	1.79248	0.630917	4	dCSAV	V	P	T	V	V	N	K	E	D	D	D	D	D	D	D	D	D	D	D	D	D	D		D	D	D	D	D	D	D	D	D	H	D	D	D	D	D	D
3352	CDCA7	263	LS	-APTV	1.0676e-07	0.000142204	0.650022	0.668996	4	dCSAV	L	L	L	L	L	S	V	-	P	P	P	P	P	P	P	P		P	P	P	P	P	P	T	P	P	P	P	P	P	P	P	P	P	P	P	P	P	P
812	CFAP70	474	GHR	-AFIMTV	1.22774e-07	0.000454509	1.25163	1.99549	4	dCSAV	G	G	H	G	G	R	I	A	A	A	A		-	A		A	A	A	A	A	A	A	A	A	A	A	A	F	T	A	T	A	M	A	F	-	M	A	M
2622	CFLAR	394	LRS	-ITV	1.0676e-07	0.00016014	1.45915	1.12581	4	dCSAV	S	R	S	L	L	S	V	I	I		I	I	I	I	I	I	T	-	-	I	I	T	I	I	I	I	I	T	I	I	I	I	I	I	I	I	I	-	I
2893	CHGB	269	AG	DEN	1.0676e-07	0.000238288	0.650022	0.664933	4	dCSAV	G	A	G	G	G	G	D	D	D	D		D	D	D	D	D	D	D	E	N	D	D	D	D	D	D	D	D	D	D	D	N	D	D	E	D	D	D	D
11088	CLBA1	242	-AG	DN	1.22774e-07	0.000120809	1.45915	0.291818	4	dCSAV	A	A	A	-	G	-	D	D	D	D	D	D	D	D	D	D	D	D	D	D	D	D	D	D	D	D	D	D	N	D	D	D	D	D	D	D	D	D
12068	CLUL1	235	-IV	ADH	1.41662e-07	0.000200594	1.25163	0.470956	4	dCSAV	V	V	V	I	V	-	D	D	D	D	H	D		D		D	D	D	D	D	D	D	D	D	D	D	D	D	D	D	D	D	D	D	D	D	D	D	D
8289	COL6A3	172	LT	-IM	1.0676e-07	0.00106397	0.650022	0.707344	4	dCSAV	L	L	L	L	L	T		M	M	M	M	M	M	M	M	M	M	M	M	M	M	M	-	M	M	M	M	M	M	M	M	M	-	M	I	-	M	M	-
8289	COL6A3	186	NQR	-K	1.0676e-07	0.00106397	1.25163	0.543564	4	dCSAV	Q	R	Q	Q	Q	N		K	K	K	K	K	K	K	K	K	K	K	K	K	K	K	-	K	K	K	K	K	K	K	K	K	-	K	K	-	K	K	-
8289	COL6A3	1529	LM	V	1.0676e-07	0.00106397	0.650022	0	3	dCSAV	L	L	L	L	L	M		V	V	V	V	V	V	V	V	V	V	V	V	V	V	V	V	V	V	V	V	V	V	V	V	V	V	V	V	V	V	V	V
12649	CXorf21	183	APT	-CFS	1.17555e-06	0.00110031	1.52193	1.30282	4	dCSAV	A		T	T	A	P	S	S	S	S	S	F	S	S	S	S	S	S	S	-		-	-	-	-	-	-	-	-	S	S	-	S	S	-	-	-	-	-
3983	DERA	252	Y	-FHIN	1.6403e-07	0.000157961	0	1.66223	2	iCSAV	Y	Y	Y	Y	Y	Y	H	N	N	-	N	H		H	-	-	N	-	N	N	N	N	N	-	N	N	-	-		N	-	N	I	-			N	-	N
3730	DLGAP5	547	AKS	-DEG	1.22774e-07	0.000282871	1.45915	0.513164	4	dCSAV	K	K	K	S	S	A	E	E	E	E	E	E	E	E	E	E	E	E		E	E	E	E	E	E	E	E	E	E	E	E	D	E	E	-	E	E	E	E
1015	DNAH10	356	ITV	-LS	1.03886e-06	0.0137441	1.37095	0.470956	4	dCSAV		V	T	I	T	T	S	S	S	S	S	S	S	L	S	S	S	S	S	S	S	S	S	S	S	S	S	S	S	S		S	S	S	-	S	S		S
1015	DNAH10	1328	AN	DHQ	1.03886e-06	0.0137441	0.721928	0.798194	4	dCSAV		N	N	N	N	A	Q	H	H	H	H	H	H	H	H	H	H	H	H	H	H	H	H	H	H	H	H	H	H	H		H	H	H	H	H	Q		H
1015	DNAH10	2302	NQ	CHKRTY	1.03886e-06	0.0137441	0.970951	0.98477	4	dCSAV		Q	Q	N	N	Q	K	H	H	H	C	H	H	H	H	H	Y	Y	H	H	H	H	H	H	H	H	H	H	H	H		H	H	H	H	R	H		H
1015	DNAH10	3416	HT	-NS	1.03886e-06	0.0137441	0.970951	1.16744	4	dCSAV		T	T	H	H	T	N	S	S	S	N	S	N	S	N	N	S	S	N	S	S	S	S	N	S	S	-	S	S	S		S	S	N	S	S	N		S
742	DNAH3	2954	Q	-EKNR	1.22774e-07	0.00152853	0	0.895149	2	iCSAV	Q	Q	Q	Q	Q	Q	R	K	K	K	R	K	K	K	E	K	K	K	K	K	K	K	K	K	K	K	K	K	K	K	K	N	R	-		K	K		K
342	DRC7	631	DIV	AKMRST	2.22401e-07	0.000595812	1.45915	2.12468	4	dCSAV	V	V	I	D	D	V	S	R		M		R	R	T		M	T	T		M	M	M	M		T	T	A	M	M	M	M	M	T	K	M	S	K		R
342	DRC7	661	DGH	EKNRS	2.22401e-07	0.000595812	1.45915	1.59736	4	dCSAV	D	G	D	H	H	D	E	N		S		N	K	N		N	N	N		N	S	N	N		N	N	N	N	N	N	N	N	R	N	N	K	K		N
6110	DRD5	440	A	IV	1.41662e-07	0.000196769	0	0.297472	2	iCSAV	A	A	A	A	A	A	V	I	V	I	V	V	V		V	V	V		V	V	V	V	V	V	V	V	V	V	V	V	V	V	V	V	V	V	V		V
1283	E2F8	469	AEG	-HNSTV	1.0676e-07	0.000287931	1.45915	1.30152	4	dCSAV	A	A	A	G	G	E	V	S	N	S	H	N	N	N	N	N	N	N	N	N	N	N	N	N	N	N	N	N	N	N	N	H	N	N	N		T	N	N
3466	EFHB	87	PST	-CGHQRY	1.90629e-07	0.000362577	1.45915	2.03651	4	dCSAV	T	T	T	P	P	S	R	C	H	R		Q	R	R	C	-	R	R	R	R	R	R	-	R	G	-	-	C	R	R	C	R	Y	R		C		H	R
3466	EFHB	245	EKNP	-AG	1.90629e-07	0.000362577	1.79248	0.825724	4	dCSAV	P	P	P	E	N	K	A	A	A	A		A	A	A	A	-	A	A	A	A	A	A	-	A	-	-	A	A	A	A	A	A	-	A		G		A	A
3466	EFHB	432	FSY	-AEGILV	1.90629e-07	0.000362577	1.45915	1.77987	4	dCSAV	Y	Y	Y	F	F	S	L	V	-	I		V	V	-	V	V	V	V	V	V	V	V	A	V	V	V	V	V	G	V	V	L	A	V		V		V	V
5353	EFHC1	77	EV	-APT	1.0676e-07	0.000206901	0.650022	0.714933	4	dCSAV	V	V	V	V	V	E	A	A	A	A	A	A	A	A	A		A	A	A	A	A	A	A	A	A	A	A	A	-	A	A	A	P	-	A	A	T	A	A
916	ENPP1	731	DPS	ATV	2.22401e-07	0.000649188	1.45915	0.73038	4	dCSAV	S	S	S	D	D	P	A	A	A	A	A	A	A	A	A	A	A	A	V	A	A	A	A		A	A		A	A	A		T	A	A	V	A	A		A
9148	ENSGALT00000010226	413	KS	-HNRY	9.31309e-08	0.000172665	0.918296	0.769325	4	dCSAV	S	S	S	K	S	K	N	N	N	R	H	N	N	N	N	N	N	N	N	N	N	N	N	N	N	N	N	N	N	N	N	N	N	N	N	N	Y	N	H
9626	ENSGALT00000012528	233	DQS	HKN	9.31309e-08	0.000166239	1.45915	0.329974	4	dCSAV	Q	Q	Q	S	S	D	H	N	N	N	N	N	N	N	N	K	N	N	N	N	N	N	N	N	N	N	N	N	N	N	N	N	N	N	N	N	N	N	N
10324	ENSGALT00000015652	667	AV	-ILM	1.6403e-07	0.000337573	0.918296	0.917119	4	dCSAV	V	V	A	V	V	A	L	L	L	L	L		L	L	L	L	L	L	L	-	L	L	L	L	L	L		L	L	L	L	L	L	L		L	M	L	L
10793	ENSGALT00000017732	652	HYZ	-LNQSTW	0.000101215	0.382591	0.918296	1.79576	4	dCSAV	H	Y	H		Z	Z	L		S	-	Q	S		W		-	T		N	S	S	S	W	S	S	S	Q	S	S	S	S	S	S	S	-	S	W	S	S
12388	ENSGALT00000025242	101	-ES	DG	2.22401e-07	0.000587138	1.58496	0.187176	4	dCSAV	-	E	-	S	S	E	D	D		D	D			D	D	D	D		D		D	D	D	D	D	G	D	D	D	D	D	D	D	D	D	D	D	D	D
12961	ENSGALT00000027531	903	EIP	AKMQRST	1.6403e-07	0.000845902	1.45915	2.10203	4	dCSAV	P	P	P	I	I	E	Q	K	A	R			T	T	M	M	T	T	T	M	T	T	T	T	T	T	M	T		T	A	M	T	T	T	T	M	A
5239	ENSGALT00000030336	164	TV	AGP	8.93416e-06	0.00568212	0.811278	0.656743	4	dCSAV		V		T	T	T	P	A	A	A	A	A	A	A		A	A	A	A	A	A	A	A		A	A	A	A	A	A	A	A	A	A	A	A	A	A	A
5474	ENSGALT00000032705	82	KNQ	-DGIRS	7.29526e-07	0.000700344	1.52193	1.43764	4	dCSAV		K	K	Q	Q	N	R	G	G	-	G	G	G	G	D	G	G	G	G	G	I	D	G	G	G	G	G	D	G	G	G	G	G	G	G	R	G	G	G
13457	ENSGALT00000032989	246	HLR	KQ	1.22774e-07	0.000193737	1.45915	0.172037	4	dCSAV	H	H	H	R	R	L		Q	Q	Q	Q	Q	Q	Q	Q	Q	Q	Q	Q	Q	Q	Q	K	Q	Q	Q	Q	Q	Q	Q	Q	Q	Q	Q	Q	Q	Q		Q
5507	ENSGALT00000033009	90	-	EPQR	8.18492e-07	0.000265191	0	0.714933	2	iCSAV		-	-	-	-	-	Q	Q	Q	Q	Q	Q	R	P	Q	Q	Q	Q	Q	Q	Q	Q	Q	Q	Q	Q	Q	Q	Q	Q	Q	Q	Q	Q	P	Q	Q	Q	P
13846	ENSGALT00000036845	48	S	EGKR	1.22774e-07	0.000124493	0	1.11789	2	iCSAV	S	S	S	S	S	S	R	R	R	R	R	R	R		R	R	R	R	R	G	R	R	R	R	K	K	R	R		R	R	R	R	R	R	R	K	K	R
6151	ENSGALT00000037492	133	FI	-LPSV	8.18492e-07	0.000427253	0.970951	0.878712	4	dCSAV		F	F	I	I	I	L	L	L	S	L	-	L	L	L	L		L	L	L	L	L	S	L	L	L	V	L	L	L	L	S	L	L	L	L	L	L	L
6637	ENSGALT00000039593	87	NW	-EKPQRZ	1.03886e-06	0.000352172	0.721928	1.46206	4	dCSAV		W	W	W	W	N	-	Q	-		Q	Q	Q	Q	Q	E	Z	Z	Q	Q	Q	Q	-	Q	Q	Q	Q	Q	Q	Q	P	Q	Q	Q	Q	Q	-	-	Q
9273	FANCI	415	AN	-IT	1.0676e-07	0.000437502	1	0.336397	4	dCSAV	N	N	N	A	A	A	T	T	I	-	T	T	T	T	T	T	T	T		T	T	T	T	T	T	T	T	T	T	T	T	T	T	T	T	T	T	T	T
5399	FBXO48	59	S	-A	1.6403e-07	7.77501e-05	0	0.841852	2	iCSAV	S	S	S	S	S	S	-	A	-	-	-	A		A		A	A	A	-		A	A	A	A	A	A	-	A	-	A	A	A	-	-	A	A	A		-
11944	FGFBP1	166	M	-AIKNSTV	9.31309e-08	6.45397e-05	0	1.96204	2	iCSAV	M	M	M	M	M	M	K	I	I	I	V	V	I	I	I	I	I	I	I	I	I	I	V	I	S	S	I	I	V	I	V	I	I	I	N	I	-	I	I
3587	FNDC1	1175	S	G	1.0676e-07	0.000535828	0	0	1	iCSAV	S	S	S	S	S	S	G	G	G	G	G	G	G	G	G	G	G	G	G	G		G	G	G	G	G	G	G	G	G	G	G	G	G	G	G	G	G	G
7263	GDPD4	106	LV	-I	1.22774e-07	0.00019521	0.918296	0.732067	4	dCSAV	V	V	V	L	L	V	I	I	I	I	I	I	-	I		I	I	I	-	I	I	I	-	I	I	I		I	-	I	I	I	I	-	I	-	I	I	I
7263	GDPD4	409	GS	DN	1.22774e-07	0.00019521	0.650022	0.291818	4	dCSAV	S	S	S	S	S	G	N	D	D	D	D	D	D	D		D	D	D	D	D	D	D	D	D	D	D		D	D	D	D	D	N	D	D	D	D	D	D
7263	GDPD4	437	EHS	DGN	1.22774e-07	0.00019521	1.45915	0.760658	4	dCSAV	H	H	H	S	S	E	N	D	D	D	D	D	D	D		D	D	D	D	G	D	D	D	G	D	D		D	D	D	D	D	N	D	D	D	D	D	N
14614	GIGYF2	1247	GRY	-FIQSVW	9.20804e-07	0.00368229	1.37095	1.5582	4	dCSAV	G	G	G	R		Y	Q	-	-	F	Q	-	W		S	-	-	-	-	-	-	-	S	-	-	I	-	-	V	S	V	-	-	-	-	-	-	-	-
6600	GPATCH1	431	-DE	AGSV	9.31309e-08	0.000271849	1.45915	1.45775	4	dCSAV	E	E	E	D	-	D	G	S	G	A	G	G	S	G	G	G	G	G	G	G	G	G	G	G	G	G	G	A	A	G	G	S	A	G	G	G	A	G	S
3874	GPLD1	280	-DS	G	8.18492e-07	0.00209452	1.37095	0	3	dCSAV	D	D	S	D		-	G	G	G	G	G	G	G	G	G	G	G	G	G	G	G	G	G	G	G	G	G	G		G	G	G	G	G	G	G	G	G	G
8868	GPR35	157	-DQ	EKV	9.20804e-07	0.000870159	1.37095	0.461882	4	dCSAV	D	D	D	-		Q		E	E	E	V	E	E	E	E	E	E	E	E	E	E	E	E	E	E	E	E	E	E	E	E	E	E	E	E	K	E	E	E
8215	HAUS8	63	GN	DES	1.22774e-07	7.47692e-05	0.650022	0.676976	4	dCSAV	N	N	N	N	N	G	S	D	D	D	S	D	D	D		D	D	D	D	D	D	D	D	D	D	D	D	D	D	D	D	D	D	D	D	D	D	D	D
1743	HEATR6	405	-CMP	ANST	1.0676e-07	0.000384656	1.79248	1.53885	4	dCSAV	-	C	M	P	P	P	T	T	T	T	S	A	A	A	T	A	N	N		T	A	T	T	A	T	S	T	T	T	A	A	T	T	T	T	S	T	T	T
8554	HEPH	1102	AL	-HPSY	1.0676e-07	0.00037761	0.650022	1.19989	4	dCSAV	L	L	L	L	L	A	Y	P	P	P	P	P	P	-	P	P	P	P		P	P	P	P	P	P	P	S	S	S	P	S	S	P	P	S	P	S	P	S
1824	HMGXB3	325	D	-E	1.41662e-07	0.000620055	0	0.297472	2	iCSAV	D	D	D	D	D	D	E	E	E		E	E	E	E		E	-	E		E	E	E	E	E	E	E	E	E	E	E	E	E	E	E	-	E	E	E	E
6551	IBA57	278	P	-AGLS	1.41662e-07	0.00014917	0	0.99582	2	iCSAV	P	P	P	P	P	P	S	-	S	G	S		S	S	A	S	S	S	S	S	S	S	S	S	S	S	S	S	S	S	L	S	S	S	A	S	S	S	S
14067	IBSP	262	N	-ADGSV	2.22401e-07	0.000234188	0	1.96332	2	iCSAV	N	N	N	N	N	N	D	D	S			S	S	S	G		G	G	G	G	G	G	-	G	G	G		G	G	G	S	S	S	S	S	G	G	S	G
12996	IFT88	299	ELY	-HQ	1.41662e-07	0.000371438	1.45915	0.731884	4	dCSAV	E	E	E	L	L	Y	Q	H	H	H	H	-	H	H		H	H	H	H		H	H	H	H	H	H	H	H	H	H	-	H	H		-	H	H	-	H
642	INPP5E	171	GS	-AT	1.0676e-07	0.000196011	0.650022	0.633805	4	dCSAV	S	S	S	S	S	G	T	T	T	A	T	T	T	T	T	T	T	T		T	T	T	T	T	T	T	T	T	T	T	T	T	A	T	T	T	T	T	A
9549	ITFG3	311	-DQ	EGR	1.41662e-07	0.000239692	1.25163	0.570858	4	dCSAV	-	Q	Q	Q	Q	D	R	E	E	E	E	G	G	E	E	E	E	E		E	E	E	E	E	E	E	E	E	E	E	G	E	E		E	E	E	E	E
12739	KCNS3	490	AMV	IST	1.0676e-07	0.000159499	1.45915	0.336397	4	dCSAV	V	V	V	A	A	M	I	T	T	T	T	T	T	T	T	T	T	T	T	T	T	T	T	T	T	T	T	T	T	S	T	T	T		T	T	T	T	T
3126	KIAA0391	307	ALS	-PT	1.41662e-07	0.000201868	1.45915	0.656743	4	dCSAV	S	S	S	A	L	L	P	P	P	P	P	P	P	T	P	P	P	P	-	P	P	P	P	P	P	P	P		P	P	P	P	P	P	P	-	P	P	-
9655	KIAA1841	482	EQ	-GR	9.31309e-08	0.000204515	0.918296	0.540365	4	dCSAV	E	Q	Q	E	E	E	G	G	G	G	G	G	G	G	G	G	G	G	G	G	G	G	G	G	G	R	G	G	G	G	G	G	G	G	G	G	G	G	G
3852	KIF27	478	ADMV	-EGK	9.87459e-06	0.0424805	2	1.23482	4	dCSAV		V	D	M		A	E	E	-	G	E	E	-	-	E	E	-	E	E	-	E	E	E	E	E	E		-	-	E	-	E		-	-		E	-	-
11844	KMT5B	122	ADGHS	-IKLMNQRT	9.31309e-08	0.000256203	2.25163	2.15842	4	dCSAV	A	A	G	D	S	H	-	I	T	-	-	T	-	Q	-	T	T	T	-	-	-	T	M	-	T	T	N	-	I	K	T	T	I	-	T	T	T	-	-
3176	LARP1B	446	CHS	-GR	1.22774e-07	0.000350274	1.45915	0.461882	4	dCSAV	C	C	C	H	S	S	G	G	G	G	G		G	G	G	G	G	G		G	G	G	-	G	G	G	G	G	G	G	G	G	R	-	G	G	G	G	G
7341	LPO	288	DHQ	-N	1.3344e-06	0.00292235	1.37095	0.183122	4	dCSAV	D	D	D		H	Q	-	N	N	N				N		N	N	N	N	N	N	N	N	N	N	N	N	N	N	N	N	N	N	N	N	N	N	N	N
8534	LRRC8A	92	IMS	AT	1.0676e-07	0.000260067	1.45915	0.60984	4	dCSAV	S	S	S	I	I	M	T	T		A	A	T	A	T	T	T	T	T	T	T	T	T	T	T	T	T	T	T	T	T	T	T	A	T	T	A	T	T	T
2784	LRRN4	482	H	FRSY	1.0676e-07	0.000254942	0	0.503184	2	iCSAV	H	H	H	H	H	H	F	Y	Y	Y	Y	Y	Y	Y	Y	Y	Y	Y	Y		Y	Y	Y	Y	Y	Y	Y	Y	Y	Y	Y	Y	Y	Y	Y	Y	Y	Y	Y
8895	LYVE1	97	IQT	KVY	9.31309e-08	7.823e-05	1.45915	0.329974	4	dCSAV	Q	Q	Q	I	T	I	K	K	K	K	K	K	K	K	K	K	K	K	K	K	K	K	K	K	K	K	K	K	K	K	K	K	K	Y	K	K	K	K	K
11125	LZTFL1	155	HSY	-CR	9.31309e-08	8.15827e-05	1.58496	0.622984	4	dCSAV	H	H	Y	S	Y	S	R	C	C	C	C	C	R	C	C	C	C	C	C	C	C	C	C	C	C	C	C	C	C	C	C	C	C	C	C	C	C	C	C
12484	MEI4	259	GRT	NS	1.17555e-06	0.00136834	1.37095	0.303375	4	dCSAV	R	R	R	T		G	S	S	S	S	S	S	S	S	S	S	S	S	S	S	S	S	S	S	N	N	S	S		S	S	S	S		S		S	S
4455	MFSD4B	246	SW	CHY	1.0676e-07	0.000158859	1	0.568996	4	dCSAV	W	W	W	S	S	S	C	Y	Y	Y	Y	Y	Y	Y	Y		Y	Y	Y	Y	Y	Y	Y	C	Y	Y	Y	Y	Y	Y	Y	Y	Y	Y	Y	Y	Y	Y	Y
7174	MTFR1	104	T	-AGP	9.31309e-08	0.000100302	0	0.493619	2	iCSAV	T	T	T	T	T	T	A	A	A	-	A	A	A	P	A	A	A	A	A	A	A	A	A	A	A	A	A	A	A	A	A	A	A	A	A	A	A	A	A
3044	MUM1	123	FP	L	1.90629e-07	0.000452363	0.650022	0	3	dCSAV	F	F	F	F	F	P	L	L	L	L	L	L	L	L	L	L	L	L		L	L	L	L		L	L		L	L	L	L	L	L	L	L	L	L	L	L
4670	NBN	411	-IL	AV	1.6403e-07	0.000394656	1.25163	0.405977	4	dCSAV	I	-	I	I	I	L	V	V	V	V	A		V	V	V	V	V		V	V	V	V	V	V	V	V	V	V		V	V	V	V	A	V	V	V	V	V
10735	NDC1	460	IK	NS	1.22774e-07	0.000247144	0.650022	0.77935	4	dCSAV	K	K	K	K	K	I	N	N	S	N	N	S	N	N	S	N	N	N		N	N	N	N	N	N	N	S	N	N	N	N	S	S	S		N	N	N	S
8878	NOLC1	355	LP	-Q	1.0676e-07	0.000269035	0.650022	0.384312	4	dCSAV	P	P	P	P	P	L	Q	Q	Q	Q	Q	Q	Q	Q	Q	Q	Q	Q		Q	Q	Q	Q	Q	Q	Q	Q	Q	Q	Q	Q	Q	Q	Q	Q	Q	Q	Q	-
2612	NPHP1	294	FGI	-CEKLQV	7.36643e-06	0.0161988	1.5	1.75936	4	dCSAV		F	F		G	I	-	E	K		L	-	-	K	L	L	K	K	K	K	K	K	K	V	K	K	K	V	K	K	K	-	C	K	K	K	-	K	-
2237	OTOA	861	AG	-FST	1.0676e-07	0.00036672	0.918296	0.941431	4	dCSAV	G	G	A	A	A	A	T	T	T	T	T	T	T	-	T	T	F	F	T	T	T	T	T	-	T	T	T	T		T	T	T	T	S	T	T	T	T	T
4216	OTUD3	125	AS	-T	1.0676e-07	0.000133877	0.918296	0.168661	4	dCSAV	A	A	A	S	S	A	T	T	T	T	T	T	T	T	T	T	T	T	-	T	T	T	T	T	T	T	T	T	T	T	T	T	T	T	T	T	T	T	T
13236	PAG1	49	NY	-HQ	1.22774e-07	0.00016464	1	0.560279	4	dCSAV	N	N	N	Y	Y	Y	H	H	-	H	H	H	H	H	H	H	H	H	H	H	H	H	H	H	Q	Q	H	H	H	H	H	Q	H	H	H		H	H	H
2931	PDZD8	484	AT	PQS	1.22774e-07	0.000437934	1	0.676976	4	dCSAV	A	A	A	T	T	T	P	P	S	P	S	P	P	P	P	P	P	P		P	P	P	P	P	P	P	P	P	P	P	P	P	P	P	P		P	P	P
11736	PHACTR2	468	-G	AESTV	1.0676e-07	0.000225477	0.650022	1.54773	4	dCSAV	G	G	G	G	G	-	V	A	V	A	V	A	V	A	V	A	V	V	A	V	V	V	V	A	A	A	A	A		A	S	A	V	A	T	A	A	A	V
11048	PIK3R4	673	C	R	1.22774e-07	0.000502022	0	0	1	iCSAV	C	C	C	C	C	C	R	R	R	R	R	R	R	R	R	R	R	R	R		R	R	R	R	R	R	R	R	R	R	R	R	R	R	R	R	R	R	R
4061	PLEKHO1	231	LT	AIV	1.22774e-07	0.000164271	0.650022	0.64505	4	dCSAV	T	T	T	T	T	L	A	V	V	V		V	V	V		V	V	V	V	V	V	V	I	V	V	V	V	V	I	V	V	V	V	V	V	V	I	V	V
2761	PNPLA7	422	AFV	-GS	1.90629e-07	0.000769761	1.45915	1.23266	4	dCSAV	V	A	V	A	A	F	S	G	G	-	G	-	-	-	-	G	G	-		-	G	G	G		G	G	G	-		G	-	G	G	-	-	G	G	-	-
9733	PRKAR2B	98	V	-I	1.22774e-07	0.000151748	0	0.988111	2	iCSAV	V	V	V	V	V	V	I	I	-	-	I	I	-	-	-	I	I	-	-	-	I	I	-	-	I	I	-	-	-	I	I	I	I	-	I	-	I
3123	PTPRB	1000	KM	ATV	1.0676e-07	0.000671626	1	1.03689	4	dCSAV	K	K	K	M	M	M	V	V	V	A		A	A	V	V	V	V	V	V	A	A	A	A	A	A	A	A	A	A	A	A	A	V	V	A	A	T	A	A
3510	REST	624	FY	CGHS	9.31309e-08	0.000268776	0.650022	0.607558	4	dCSAV	Y	Y	Y	Y	Y	F	H	C	C	C	C	C	C	C	C	C	C	C	C	C	C	C	C	C	C	C	C	C	C	C	C	C	C	C	C	C	C	C	C
333	REXO1	552	PS	-AGTV	1.03886e-06	0.0040266	0.721928	0.695987	4	dCSAV	S	S	S		S	P	G	A	A	A	A	A	A	A	-	A	A	A	A	A	A	A		A	A	A	A	A	V	A	A	A	A			A	A	A	A
11469	RIOK1	507	AFNV	-DEKQ	1.22774e-07	0.000217678	1.79248	0.914505	4	dCSAV	N	N	N	A	V	F	Q	E	E	E	E	E	E	E	E	E	E	E	E	E	E	E	-	E	E	K		K	E	E	E	E	E	D	E		E	E	E
9939	RPAP1	760	-SY	ACDHLQR	1.6403e-07	0.000715498	1.45915	2.09506	4	dCSAV	-	-	-	S	S	Y	A	C	H	Q	H		L	R	H	H	R	R		H	R	R	R	R	R	R	C	R		H	R	C	Q	C	H	D		R	C
5028	SACS	2257	IN	AT	1.90629e-07	0.00263125	0.650022	0.183122	4	dCSAV	N	N	N	N	N	I	T	T	T	T	A	T	T	T	T	T	T	T			T	T	T	T	T	T	T	T	T	T		T	T		T	T	T	T	T
7547	SCAMP2	109	D	-N	1.0676e-07	0.000119785	0	0.168661	2	iCSAV	D	D	D	D	D	D	N	N	N	N	N	-	N	N	N	N	N	N	N	N	N	N	N	N	N	N	N	N	N	N	N		N	N	N	N	N	N	N
11491	SERPINB6	111	IS	-AFL	1.90629e-07	0.000219033	0.650022	1.1085	4	dCSAV	S	S	S	S	S	I	-	F		L	L	L		F	F	F	F		F		F	F	F	F	F	F	F	L	F	L	F	F	A	F	F	L	F	L	F
12231	SESN1	126	T	-AMV	9.31309e-08	0.000158416	0	1.18463	2	iCSAV	T	T	T	T	T	T	A	M	-	M	V	M	M	M	A	-	-	M	M	M	M	M	V	M	M	M	M	-	M	M	M	M	V	M	M	M	M	M	M
4699	SETD4	19	KR	-Q	9.20804e-07	0.00122099	0.721928	0.172037	4	dCSAV	K	K	K	R		K	Q	Q	Q		Q	Q	Q	Q	Q	Q	Q	Q	Q	Q	Q	Q	Q	Q	Q	Q	Q	Q	-	Q		Q	Q	Q	Q	Q	Q	Q	Q
12396	SH3BP2	220	PS	AGNT	9.31309e-08	0.00016121	0.650022	0.832554	4	dCSAV	P	P	P	P	P	S	A	A	A	A	T	T	A	A	A	A	N	N	A	A	A	A	A	A	A	A	A	A	A	A	A	G	A	A	A	G	A	A	A
14534	SMCR8	217	LQV	AI	9.31309e-08	0.000272687	1.45915	0.165427	4	dCSAV	Q	Q	Q	L	V	V	A	I	I	I	I	I	I	I	I	I	I	I	I	I	I	I	I	I	I	I	I	I	I	I	I	I	I	I	I	I	I	I	I
244	SMPD3	311	C	-Y	9.31309e-08	0.000188031	0	0.165427	2	iCSAV	C	C	C	C	C	C	Y	Y	Y	Y	Y	Y	Y	Y	Y	Y	Y	Y	Y	Y	Y	Y	Y	Y	Y	Y	Y	Y	Y	Y	Y	Y	Y	Y	Y	Y	Y	Y	Y
8024	SPAG16	125	KLT	MRV	1.17555e-06	0.000807601	1.37095	0.357429	4	dCSAV	L	L	L		T	K	M	M	M		M	M	M	M		M	M		M	M	M	M	M	M	M	M	M	M	M	M	M	M	M	V	M	M	M		R
5009	SPART	412	FIKLM	-CHVYZ	1.22774e-07	0.000249722	2.25163	1.38711	4	dCSAV	F	L	K	M	I	L	V	Y	Y	-	V	Y	Y	Y	Y	-	Y		Y	Y	Y	Y	-	Y	Y	-	Y	Y	Z	Y	Y	Y	Y	Y	-	Y	C	H	Y
2607	SPG11	1900	ALP	-CQS	1.41662e-07	0.00111304	1.25163	0.643355	4	dCSAV	P	L	A	P	P	P	Q	S	S	S	S	-	S	S	-	S	S	S	S		S	S		S	S	S	S	S	S	S	S	S	S	S	S		S	S	S
6109	SYCP2L	516	GPQY	-DFIKLMNRSV	9.20804e-07	0.00256904	1.92193	2.82709	4	dCSAV	P	Q	G	P		Y	L	S	L	-	I		F	-	F	R	L	L	L	K	L	I	L	L	M	L	L	K		L	L	L	S	-	L	D	R	L	L
4119	SYNJ2	440	QR	H	1.90629e-07	0.000804074	0.918296	0	3	dCSAV	Q	Q	Q	R	Q	R	H	H		H	H	H	H	H	H	H	H	H		H	H	H		H	H	H	H	H	H	H	H	H	H	H	H	H			H
11394	TANC1	1634	V	-AIKLMPT	1.22774e-07	0.000699811	0	2.27455	2	iCSAV	V	V	V	V	V	V	M	T	M	M	P	M	M	P	T		M	M	M	L	M	M	T	M	M	M	-		A	T	M	A	M	-	-	M	-	A	-
8838	TASOR	700	GPS	-AT	1.90629e-07	0.000964203	1.58496	0.365099	4	dCSAV	G	G	S	P	P	S	A	T	T	T	T		T	T	T	T	T		T		T	T	T	T	T	T	T	T	T	T	T	T	T	T	T	T	T	T	-
8865	TCOF1	287	-ASV	LPQ	1.0676e-07	0.000206901	1.79248	1.1432	4	dCSAV	V	V	-	A	V	S	P	L	P	P	P	P	L	P	P	L	P	P		P	L	P	P	L	P	P	L	L	P	L	P	L	L	P	L	L	L	P	Q
13335	TCTE3	84	EKN	DGH	1.22774e-07	4.56719e-05	1.25163	0.64505	4	dCSAV	K	N	N	N	N	E	D		G	D	G	G	G		D	G	G	G	G	G	G	G	G	G	G	G	G	G	G	G	G	G	G	G	G	G	D	G	H
4100	TDP2	270	E	KQRT	1.41662e-07	0.00016362	0	0.742141	2	iCSAV	E	E	E	E	E	E	R	K	K	K	K	K		Q	K	K	K	K	K	K	R	K	K	T	K	K	K		K	K	K	K	R	K	K	K	K	K	K
11043	TDRD9	800	MV	-L	1.41662e-07	0.000529533	1	0.86804	4	dCSAV	V	V	V	M	M	M	L	L	L	-	L	L	L	-	-		L	L		L	L	L	-	-	L	L	L	L	L	-		L	L	-	-	-	L	L	L
11043	TDRD9	998	HK	-DNS	1.41662e-07	0.000529533	0.918296	1.42879	4	dCSAV	K	K	K	H	H	K	N	S	-	-	N	D	N	-	-		N	N		N	N	N	-	-	N	N	N	N	N	-		N	N	-	-	-	N	N	N
9260	TICRR	332	AN	LMTV	1.22774e-07	0.000323755	0.650022	1.28155	4	dCSAV	A	A	A	A	A	N	V	V	M	M	V	V		V	V	V	M	M		M	M	T	M	M	M	M	T	M	M	M	M	V	M	M	V	V	M	M	L
2556	TMEM209	182	-S	ANPTV	1.90629e-07	0.000325976	1	1.15309	4	dCSAV	S	S	S	-	-	-	A	A			T	P		A		A	A	A	A	A	P	A	A	A	A	A	A	A	V	A	A	A	T		A	A	A	A	A
12062	TNFRSF1A	251	HKRY	IN	1.0676e-07	0.000139642	1.9183	0.168661	4	dCSAV	R	R	H	K	K	Y	N	N	N	N	I	N	N	N	N	N	N	N	N	N	N	N	N	N	N	N	N	N	N	N	N	N	N	N	N	N	N	N
11356	TNS3	961	EPS	-ADFIKLRV	1.6403e-07	0.000777993	1.45915	1.97272	4	dCSAV	P	S	S	E	P	S	-	V	-	-	D	-	-	-	-		L	-	-	-	-	A	-	-	A	A	-	-	-	A	-	R	A	-	-		I		-
12758	TP53I3	354	ADQ	EKLR	1.0676e-07	0.000120745	1.45915	1.04176	4	dCSAV	A	A	A	D	D	Q	K	E	E	K	E	E	K	E	K	E	E	E	E	E	E	E		K	E	E	E	E	E	E	E	E	L	K	E	E	K	E	E
9561	TPCN2	65	-EN	KRT	1.6403e-07	0.00037694	1.45915	0.581889	4	dCSAV	E	E	E	N	N	-		K	K	K	K	K	K	K	K	K			K	K	K	K	K	K	K	K	K	K		K	K	K	K	K	K	K	K	K	K
9561	TPCN2	114	-AK	E	1.6403e-07	0.00037694	1.45915	0	3	dCSAV	K	K	K	A	A	-		E	E	E	E	E	E	E	E	E			E	E	E	E	E	E	E	E	E	E		E	E	E	E	E	E	E	E	E	E
1525	TRAFD1	453	GPT	-ADEV	1.17555e-06	0.00225	1.52193	1.20363	4	dCSAV		G	G	T	T	P	A	-	A	-	A	A	A	A		-	A	A		A	A	A	A	A	-	A	A	A	A	A	A	A	A		A	A	A	A	A
6704	TREM2	206	DGS	-HN	9.31309e-08	6.62161e-05	1.45915	0.444839	4	dCSAV	G	G	G	S	S	D	-	N	N	N	-	N	N	N	N	N	N	N	N	N	N	N	N	N	N	N	N	N	N	N	N	N	N	N	N	N	N	N	N
8668	TSEN2	264	MS	AGIRTV	9.31309e-08	0.000136344	0.650022	1.36801	4	dCSAV	M	M	M	M	M	S	G	I	I	V	I	I	V	I	I	I	I	I	I	I	I	I	I	I	I	I	I	I	V	I	I	I	I	I	R	T	I	I	I
4356	TTC37	754	AET	-DGNS	1.03886e-06	0.00490236	1.52193	1.53961	4	dCSAV		T	T	A	A	E	D	G	G		G	D	G	G	D	G	G	G	G		G	G	S	G	G	G	G	G		G	G	D	D	-	D	G	G	-	D
10870	URB2	106	K	AEGQ	1.0676e-07	0.000503479	0	0.618996	2	iCSAV	K	K	K	K	K	K	E	E	E	E	E	E	E	E	Q	E	E	E	E	E	E	E	E	E	E	E	E	E	E	E	E	A	E	G	E		E	G	E
8239	USP4	264	ARS	-IMTV	1.22774e-07	0.000347695	1.45915	1.70335	4	dCSAV	A	A	A	S	S	R	V	-	I	I	V	I	V	I	V	-	I	I		I	M	I	-	I	I	I	I	-	V	I	V	V	V	I		I	V	V	T
467	WDR77	287	GNP	RS	1.0676e-07	0.000119144	1.45915	0.669016	4	dCSAV	G	G	G	N	N	P	S	S	S	S	S	R	S	S	S	S	S	S		S	S	S	S	S	S	S	S	S	S	S	S	S	R	S	S	S	R	S	S
3429	WDR78	226	AEF	-PS	1.90629e-07	0.000459798	1.45915	0.365099	4	dCSAV	E	E	E	F	F	A	S	S	S		S	S		S		S	S	S		S	S	S	S	S	S	S	S	-	S	S	S	S	S	P		S	S	S	S
9158	XPC	457	P	CHR	9.31309e-08	0.000241116	0	0.827586	2	iCSAV	P	P	P	P	P	P	R	R	C	R	R	R	R	R	C	R	R	R	R	H	R	R	R	R	R	R	R	R	R	R	R	R	H	R	R	R	R	H	C
12111	ZBTB49	198	G	AILMV	1.0676e-07	0.000252701	0	1.19468	2	iCSAV	G	G	G	G	G	G	A	V	V	V	M	V	V	V	V	L	V	V	V	V	V	I	V	V	V	V	V	A		V	V	V	V	V	V	A	I	V	V
9809	ZC3H6	1131	APS	-INT	1.0676e-07	0.000392983	1.25163	1.27879	4	dCSAV	P	P	P	A	P	S	T	N	N	-	I	-	T	N	-	N	N	N	-	N	N	N	N	N	N	N	N	N	T	N	N	N	T	-	N		T	N	N
676	ZDHHC1	458	FMS	-DILTV	1.6403e-07	0.000284428	1.45915	1.713	4	dCSAV	M	M	M	S	S	F	I	D	I	T			I	I	-	I	I	I		T	I	I	I	I	T	T	I	I	I	T	T	I	L	-	I	I	I	I	-
[truncated: 68 more columns]
