# Supplementary material for: Rules of amino acid convergence: Not how many, but who in avian vocal learning clades
Source: Research Square preprint supplement (doi:10.21203/rs.3.rs-100389/v1), 2020-11-09
Supplement: Supplementary file 5 [file 3bd44b2deac91541ce90043b.xlsx]

## Sheet: Supplementary_Data_3
Gene symbol	AA position in MSA	SAV type	AA of human	AA of non-human primates	Human	Chimpanzee	Bonobo	Gorilla	Orangutan	Gibbon	Sooty mangabey	Drill	Olive baboon	Crab-eating macaque	Macaque	Pig-tailed macaque	Vervet-AGM	Golden snub-nosed monkey	Black snub-nosed monkey	Angola colobus	Capuchin	Bolivian squirrel monkey	Marmoset	Ma's night monkey	Tarsier	Mouse Lemur	Coquerel's sifaka	Bushbaby	Nucleotide position in MSA	SCV type	Codon of human	Codon of non-human primates	Human	Chimpanzee	Bonobo	Gorilla	Orangutan	Gibbon	Sooty mangabey	Drill	Olive baboon	Crab-eating macaque	Macaque	Pig-tailed macaque	Vervet-AGM	Golden snub-nosed monkey	Black snub-nosed monkey	Angola colobus	Capuchin
ABCG2	57	1	A	T	A	T	T	T	T	T	T	T	T	T	T	T	T	T	T	T	T	T	T	T	T	T	T	T	169	2	GCT	ACC,ACT	GCT	ACT	ACT	ACT	ACT	ACT	ACT	ACT	ACT	ACT	ACT	ACT	ACT	ACT	ACT	ACT	ACT
ABCG2	182	1	A	P	A	P	P	P	P	P	P	P	P	P	P	P	P	P	P	P	P	P	P	P	P	P	P	P	544	1	GCA	CCA	GCA	CCA	CCA	CCA	CCA	CCA	CCA	CCA	CCA	CCA	CCA	CCA	CCA	CCA	CCA	CCA	CCA
ABCG2	442	2	V	-I	V	I	I	I	I	I	I	I	I	I	I	I	I	I	I	I	I	I	I	I	I	-	I	I	1324	2	GTA	---,ATA	GTA	ATA	ATA	ATA	ATA	ATA	ATA	ATA	ATA	ATA	ATA	ATA	ATA	ATA	ATA	ATA	ATA
ACP2	29	1	R	Q	R	Q	Q	Q	Q	Q	Q	Q	Q	Q	Q	Q	Q	Q	Q	Q	Q	Q	Q	Q	Q	Q	Q	Q	85	1	CGG	CAG	CGG	CAG	CAG	CAG	CAG	CAG	CAG	CAG	CAG	CAG	CAG	CAG	CAG	CAG	CAG	CAG	CAG
AKAP1	368	1	K	E	K	E	E	E	E	E	E	E	E	E	E	E	E	E	E		E	E	E	E	E	E	E	E	1102	1	AAG	GAG	AAG	GAG	GAG	GAG	GAG	GAG	GAG	GAG	GAG	GAG	GAG	GAG	GAG	GAG	GAG		GAG
AKAP1	439	2	V	AST	V	A	A	A	A	A	A	A	A	A	A	A	A	A	A		A	A	A	A	T	T	T	S	1315	2	GTT	ACC,ACT,GCT,TCC	GTT	GCT	GCT	GCT	GCT	GCT	GCT	GCT	GCT	GCT	GCT	GCT	GCT	GCT	GCT		GCT
ALKBH4	252	2	T	AS	T		A	A	A	A	A	A	A	A	A	A	A	A	A	A	S	S	S	S	A	A	A	A	754	2	ACA	GCA,GCC,TCA,TCG	ACA		GCA	GCA	GCA	GCA	GCA	GCA	GCA	GCA	GCA	GCA	GCA	GCA	GCA	GCA	TCG
ALPK1	384	2	L	MR	L	M	M	M	M	M	M	M	M	M	M	M	M	M	M	M	M	R	M	M	M	M	M	M	1150	2	TTG	AGG,ATG	TTG	ATG	ATG	ATG	ATG	ATG	ATG	ATG	ATG	ATG	ATG	ATG	ATG	ATG	ATG	ATG	ATG
ALPK1	388	1	H	Y	H	Y	Y	Y	Y	Y	Y	Y	Y	Y	Y	Y	Y	Y	Y	Y	Y	Y	Y	Y	Y	Y	Y	Y	1162	2	CAT	TAC,TAT	CAT	TAC	TAT	TAT	TAT	TAT	TAT	TAT	TAT	TAT	TAT	TAT	TAT	TAT	TAT	TAT	TAT
ALPK1	704	2	M	APTV	M	V	V	V	V	V	V	V	V	V	V	V	V	V	V	V	A	P	T	A	V	V	V	V	2110	2	ATG	ACG,CCG,GCA,GCT,GTA,GTG	ATG	GTG	GTG	GTG	GTG	GTG	GTG	GTG	GTG	GTG	GTG	GTG	GTG	GTG	GTG	GTG	GCT
ALPK1	748	1	I	T	I	T	T	T	T	T	T	T	T	T	T	T	T	T	T	T	T	T	T	T	T	T	T	T	2242	2	ATT	ACA,ACC,ACT	ATT	ACT	ACT	ACT	ACT	ACT	ACT	ACT	ACT	ACT	ACT	ACT	ACT	ACT	ACT	ACT	ACT
ALPK1	985	2	I	AT	I	T	T	T	T	T	T	T	T	T	T	T	T	T	T	T	T	T	T	T	A	A	A	T	2953	2	ATT	ACT,GCC,GCT	ATT	ACT	ACT	ACT	ACT	ACT	ACT	ACT	ACT	ACT	ACT	ACT	ACT	ACT	ACT	ACT	ACT
ALPK1	1405	2	F	-V	F	V	V	V	V	V	V	V	V	V	V	V	V	V	V	V	V	V	V	V	-	V	V	V	4213	2	TTC	---,GTC	TTC	GTC	GTC	GTC	GTC	GTC	GTC	GTC	GTC	GTC	GTC	GTC	GTC	GTC	GTC	GTC	GTC
ANKFN1	338	1	E	K	E	K	K	K	K	K	K	K	K	K	K	K	K	K	K	K	K	K	K	K	K	K	K	K	1012	2	GAA	AAA,AAG	GAA	AAA	AAA	AAA	AAA	AAA	AAA	AAA	AAA	AAA	AAA	AAA	AAA	AAA	AAA	AAA	AAA
ANKFN1	633	2	F	-S	F	S	S	S	S	S	S	S	S	S	S	S	S	S	-	S	S	S	S	-	S	S	S	S	1897	2	TTT	---,TCT	TTT	TCT	TCT	TCT	TCT	TCT	TCT	TCT	TCT	TCT	TCT	TCT	TCT	TCT	---	TCT	TCT
ARMC6	67	2	C	-PR	C	-	-	-	R	-	R	R	-	-	-	-	-	R	R	R	-		-	-	P	-	-	-	199	2	TGC	---,CCT,CGC	TGC	---	---	---	CGC	---	CGC	CGC	---	---	---	---	---	CGC	CGC	CGC	---
ARMC6	191	2	M	ATV	M	T	T	T	T	T	T	T	T	T	T	T	T	T	T	T	T		T	T	A	A	A	V	571	2	ATG	ACA,ACG,ACT,GCC,GTC	ATG	ACG	ACG	ACG	ACG	ACG	ACA	ACG	ACG	ACG	ACG	ACG	ACT	ACG	ACG	ACG	ACA
ASH1L	164	1	R	H	R	H	H	H	H	H	H	H	H	H	H	H	H	H	H	H	H	H	H	H	H	H	H	H	490	1	CGT	CAT	CGT	CAT	CAT	CAT	CAT	CAT	CAT	CAT	CAT	CAT	CAT	CAT	CAT	CAT	CAT	CAT	CAT
ASH1L	1774	2	T	AP	T	A	A	A	A	A	A	A	A	A	A	A	A	A	A	A	P	P	P	P	P	P	P	P	5320	2	ACA	CCA,CCG,GCA	ACA	GCA	GCA	GCA	GCA	GCA	GCA	GCA	GCA	GCA	GCA	GCA	GCA	GCA	GCA	GCA	CCA
BRCA2	262	2	A	-GRT	A	T	T	T	T	T	T	T	T	T	T	T	T	T	-	T	T		T	T	R	G	G	R	784	2	GCA	---,ACA,AGA,GGA	GCA	ACA	ACA	ACA	ACA	ACA	ACA	ACA	ACA	ACA	ACA	ACA	ACA	ACA	---	ACA	ACA
BRCA2	577	2	N	-ST	N	T	T	T	T	T	T	T	T	T	T	T	T	T	-	T	T		T	T	S	T	T	T	1729	2	AAT	---,ACT,AGT	AAT	ACT	ACT	ACT	ACT	ACT	ACT	ACT	ACT	ACT	ACT	ACT	ACT	ACT	---	ACT	ACT
BRCA2	999	2	E	-DN	E	D	D	D	D	D	D	D	D	D	D	D	D	D	-	D	N		N	N	N	N	N	N	2995	2	GAA	---,AAC,GAC	GAA	GAC	GAC	GAC	GAC	GAC	GAC	GAC	GAC	GAC	GAC	GAC	GAC	GAC	---	GAC	AAC
BRCA2	1006	2	N	-D	N	D	D	D	D	D	D	D	D	D	D	D	D	D	-	D	D		D	D	D	D	D	D	3016	2	AAC	---,GAC,GAT	AAC	GAC	GAC	GAC	GAC	GAC	GAC	GAC	GAC	GAC	GAC	GAC	GAC	GAC	---	GAC	GAC
BRCA2	1616	2	A	-T	A	T	T	T	T	T	T	T	T	T	T	T	T	T	-	T	T		T	T	T	T	T	T	4846	2	GCT	---,ACT	GCT	ACT	ACT	ACT	ACT	ACT	ACT	ACT	ACT	ACT	ACT	ACT	ACT	ACT	---	ACT	ACT
BRCA2	2024	1	A	T	A	T	T	T	T	T	T	T	T	T	T	T	T	T	T	T	T		T	T	T	T	T	T	6070	1	GCA	ACA	GCA	ACA	ACA	ACA	ACA	ACA	ACA	ACA	ACA	ACA	ACA	ACA	ACA	ACA	ACA	ACA	ACA
BRCA2	2556	1	K	E	K	E	E	E	E	E	E	E	E	E	E	E	E	E	E	E	E		E	E	E	E	E	E	7666	1	AAA	GAA	AAA	GAA	GAA	GAA	GAA	GAA	GAA	GAA	GAA	GAA	GAA	GAA	GAA	GAA	GAA	GAA	GAA
BRCA2	2779	2	V	-AC	V	A	A	A	A	A	A	A	A	A	A	A	A	A	-	A	A		A	A	A	A	A	C	8335	2	GTA	---,GCA,GCG,TGT	GTA	GCA	GCA	GCA	GCA	GCA	GCA	GCA	GCA	GCA	GCA	GCA	GCA	GCA	---	GCA	GCA
BRCA2	2975	2	T	-LM	T	M	M	M	M	M	M	M	M	M	M	M	M	M	-	M	M		M	M	M	L	L	L	8923	2	ACG	---,ATG,TTA,TTG	ACG	ATG	ATG	ATG	ATG	ATG	ATG	ATG	ATG	ATG	ATG	ATG	ATG	ATG	---	ATG	ATG
BRCA2	3432	2	I	-V	I	V	V	V	V	V	V	V	V	V	V	V	V	V	-	V	V		V	V	V	-	V	V	10294	2	ATT	---,GTT	ATT	GTT	GTT	GTT	GTT	GTT	GTT	GTT	GTT	GTT	GTT	GTT	GTT	GTT	---	GTT	GTT
BRIP1	929	2	S	-PV	S	P	P	P	P	P	P	P	P	P	P	P	P	P	P	P	P	P	-	P	P	V		P	2785	2	TCA	---,CCA,GTG	TCA	CCA	CCA	CCA	CCA	CCA	CCA	CCA	CCA	CCA	CCA	CCA	CCA	CCA	CCA	CCA	CCA
C3orf67	437	2	I	DNS	I	N	N	N	N	S	N	N	N	N	N	N		N	N	D	N	N	N	N	N	S	S	N	1309	2	ATT	AAT,AGT,GAT	ATT	AAT	AAT	AAT	AAT	AGT	AAT	AAT	AAT	AAT	AAT	AAT		AAT	AAT	GAT	AAT
C3orf67	739	2	W	-R	W	R	R	R	R	R	R	R	R	R	R	R		-	R	R	R	R	R	R	R	R	R	R	2215	2	TGG	---,CGG,CGT	TGG	CGG	CGG	CGG	CGG	CGG	CGG	CGG	CGG	CGG	CGG	CGG		---	CGG	CGT	CGG
C3orf67	828	2	C	-PS	C	S	S	S	S	S	S	S	S	S	S	S		-	S	S	S	S	S	S	S	P	P	-	2482	2	TGT	---,CCT,TCT	TGT	TCT	TCT	TCT	TCT	TCT	TCT	TCT	TCT	TCT	TCT	TCT		---	TCT	TCT	TCT
C8B	115	2	G	-E	G	E	E	E	E	-	E	-	E	E	E	E	E	E	E	-	E	E	E	E	E	E	E	E	343	2	GGG	---,GAG	GGG	GAG	GAG	GAG	GAG	---	GAG	---	GAG	GAG	GAG	GAG	GAG	GAG	GAG	---	GAG
C8B	229	1	G	R	G	R	R	R	R	R	R	R	R	R	R	R	R	R	R	R	R	R	R	R	R	R	R	R	685	1	GGA	AGA	GGA	AGA	AGA	AGA	AGA	AGA	AGA	AGA	AGA	AGA	AGA	AGA	AGA	AGA	AGA	AGA	AGA
C8B	654	2	T	-IMV	T	I	I	I	I	M	-	I	I	I	I	I	I	I	I	I	I	I	I	I	V	V	V	V	1960	2	ACC	---,ATC,ATG,GTC,GTT	ACC	ATC	ATC	ATC	ATC	ATG	---	ATC	ATC	ATC	ATC	ATC	ATC	ATC	ATC	ATC	ATC
CCDC13	662	2	S	AT	S	T	T	T	T	T	T	T	T	T	T	T	T	T	T	T	A	A	A	A	T		T	T	1984	2	TCA	ACA,ACG,GCA,GCG	TCA	ACA	ACA	ACA	ACA	ACA	ACA	ACA	ACA	ACA	ACA	ACA	ACA	ACA	ACA	ACA	GCA
CCDC69	199	1	R	K	R			K	K	K	K	K	K	K	K	K	K	K	K	K	K	K	K	K	K	K	K	K	595	1	AGG	AAG	AGG			AAG	AAG	AAG	AAG	AAG	AAG	AAG	AAG	AAG	AAG	AAG	AAG	AAG	AAG
CDCA7	171	2	R	LP	R	P	P	P	P	P	P	P	P	P	P	P	P		P	P			P			P	L	P	511	2	CGC	CCA,CCC,CCT,CTT	CGC	CCC	CCC	CCC	CCC	CCC	CCC	CCC	CCC	CCC	CCC	CCC	CCC		CCC	CCC
CDCA7	295	2	V	IMT	V	M	M	M	M	M	M	M	M	M	M	M	M		M	M			M			T	I	M	883	2	GTG	ACG,ATA,ATG	GTG	ATG	ATG	ATG	ATG	ATG	ATG	ATG	ATG	ATG	ATG	ATG	ATG		ATG	ATG
CFAP70	83	2	S	-L	S	L	L	L	L	L	L	L	L	L	L	L	-	L	L	L	L	L	L	L	L	L	-	L	247	2	TCA	---,TTA	TCA	TTA	TTA	TTA	TTA	TTA	TTA	TTA	TTA	TTA	TTA	TTA	---	TTA	TTA	TTA	TTA
CFAP70	811	2	-	STV	-	V	V	V	V	V	V	V	V	V	V	V	V	V	V	V	T	T	T	T	T	S	S	S	2431	2	---	ACT,AGC,AGT,GTT	---	GTT	GTT	GTT	GTT	GTT	GTT	GTT	GTT	GTT	GTT	GTT	GTT	GTT	GTT	GTT	ACT
CFAP70	1051	1	N	D	N	D	D	D	D	D	D	D	D	D	D	D	D	D	D	D	D	D	D	D	D	D	D	D	3151	1	AAC	GAC	AAC	GAC	GAC	GAC	GAC	GAC	GAC	GAC	GAC	GAC	GAC	GAC	GAC	GAC	GAC	GAC	GAC
CFLAR	275	2	A	-IT	A	T	T	T	T	T	T	T	T	T	T	T	T	T	T	T	T	T		T	-	I	-	I	823	2	GCT	---,ACT,ATT	GCT	ACT	ACT	ACT	ACT	ACT	ACT	ACT	ACT	ACT	ACT	ACT	ACT	ACT	ACT	ACT	ACT
CHGB	58	1	G	E	G	E	E	E	E	E	E	E	E	E	E	E	E	E	E	E	E	E	E	E	E	E	E	E	172	1	GGA	GAA	GGA	GAA	GAA	GAA	GAA	GAA	GAA	GAA	GAA	GAA	GAA	GAA	GAA	GAA	GAA	GAA	GAA
CHGB	234	1	K	N	K	N	N	N	N	N	N	N	N	N	N	N	N	N	N	N	N	N	N	N	N	N	N	N	700	2	AAG	AAC,AAT	AAG	AAC	AAC	AAC	AAT	AAC	AAT	AAT	AAT	AAC	AAC	AAC	AAC	AAC	AAC	AAC	AAC
CLBA1	201	2	V	-HL	V	L	L	L	L	-	L	L	L	L	L	L	L	L	L	L	L	H	L	L	L	L	L		601	2	GTT	---,CAT,CTT	GTT	CTT	CTT	CTT	CTT	---	CTT	CTT	CTT	CTT	CTT	CTT	CTT	CTT	CTT	CTT	CTT
CLBA1	203	2	R	-CPS	R	C	C	C	C	-	C	C	C	C	C	C	C	C	C	C	C	C	C	C	P	S	S		607	2	CGT	---,CCT,TCT,TGT	CGT	TGT	TGT	TGT	TGT	---	TGT	TGT	TGT	TGT	TGT	TGT	TGT	TGT	TGT	TGT	TGT
CLUL1	50	2	T	-A	T	A	A	A	-	A	-	A	A	-	-	A	-	A	A	-	-	-	-	-	-	-	-	-	148	2	ACT	---,GCT	ACT	GCT	GCT	GCT	---	GCT	---	GCT	GCT	---	---	GCT	---	GCT	GCT	---	---
CLUL1	56	2	N	-DG	N	D	D	D	-	G	-	D	D	-	-	D	-	D	D	-	-	-	-	-	-	-	-	-	166	2	AAT	---,GAT,GGT	AAT	GAT	GAT	GAT	---	GGT	---	GAT	GAT	---	---	GAT	---	GAT	GAT	---	---
CLUL1	76	2	S	-KP	S	P	P	P	-	P	-	K	K	-	-	K	-	K	K	-	-	-	-	-	-	-	-	-	226	2	TCG	---,AAG,CCG	TCG	CCG	CCG	CCG	---	CCG	---	AAG	AAG	---	---	AAG	---	AAG	AAG	---	---
CLUL1	182	2	C	-Y	C	Y	Y	Y	Y	Y	Y	-	Y	Y	Y	Y	Y	Y	Y	Y	Y	Y	Y	Y	Y	Y	Y	Y	544	2	TGT	---,TAT	TGT	TAT	TAT	TAT	TAT	TAT	TAT	---	TAT	TAT	TAT	TAT	TAT	TAT	TAT	TAT	TAT
CLUL1	313	2	E	-LV	E	V	V	V	V	V	V	V	V	V	-	V	V	V	V	V	V	V	V	V	V	L	V	V	937	2	GAG	---,CTG,GTG	GAG	GTG	GTG	GTG	GTG	GTG	GTG	GTG	GTG	GTG	---	GTG	GTG	GTG	GTG	GTG	GTG
CLUL1	527	2	M	AT	M	T	T	T	T	T	T	T	T	T	T	T	T	T	T	T	T	T	T	T	T	T	T	A	1579	2	ATG	ACA,ACG,GCA	ATG	ACG	ACG	ACA	ACG	ACA	ACA	ACA	ACA	ACA	ACA	ACA	ACA	ACA	ACA	ACA	ACA
CLUL1	646	2	A	ITV	A	T	T	T	T	T	T	T	T	T	T	T	T	T	T	T	T	T	T	T	T	V	V	I	1936	2	GCC	ACC,ACT,ATC,GTT	GCC	ACC	ACC	ACC	ACC	ACC	ACC	ACC	ACC	ACC	ACC	ACC	ACC	ACC	ACC	ACC	ACT
COL6A3	1046	1	H	Q	H	Q	Q	Q	Q	Q	Q	Q	Q	Q	Q	Q	Q	Q	Q	Q	Q	Q	Q	Q	Q	Q	Q	Q	3136	2	CAT	CAA,CAG	CAT	CAA	CAA	CAA	CAA	CAA	CAA	CAA	CAA	CAA	CAA	CAA	CAA	CAA	CAA	CAA	CAA
COL6A3	1128	1	K	Q	K	Q	Q	Q	Q	Q	Q	Q	Q	Q	Q	Q	Q	Q	Q	Q	Q	Q	Q	Q	Q	Q	Q	Q	3382	1	AAG	CAG	AAG	CAG	CAG	CAG	CAG	CAG	CAG	CAG	CAG	CAG	CAG	CAG	CAG	CAG	CAG	CAG	CAG
COL6A3	1291	1	V	I	V	I	I	I	I	I	I	I	I	I	I	I	I	I	I	I	I	I	I	I	I	I	I	I	3871	2	GTT	ATC,ATT	GTT	ATT	ATT	ATT	ATT	ATC	ATC	ATC	ATC	ATC	ATC	ATC	ATC	ATT	ATT	ATC	ATC
COL6A3	1354	1	N	S	N	S	S	S	S	S	S	S	S	S	S	S	S	S	S	S	S	S	S	S	S	S	S	S	4060	2	AAT	AGC,AGT	AAT	AGC	AGT	AGT	AGT	AGT	AGT	AGT	AGT	AGT	AGT	AGT	AGT	AGT	AGT	AGT	AGT
COL6A3	2056	2	V	-A	V	A	A	A	A	A	A	A	A	A	A	-	A	A	A	A	A	A	A	A	A	-	A	A	6166	2	GTC	---,GCC	GTC	GCC	GCC	GCC	GCC	GCC	GCC	GCC	GCC	GCC	GCC	---	GCC	GCC	GCC	GCC	GCC
COL6A3	3119	2	M	-AT	M	T	T	T	T	T	T	T	T	T	T	T	T	T	T	T	A	-	A	A	T	-	-	T	9355	2	ATG	---,ACA,ACG,GCA	ATG	ACG	ACG	ACG	ACG	ACG	ACG	ACG	ACG	ACG	ACG	ACG	ACG	ACG	ACG	ACG	GCA
COL6A3	3193	2	M	-V	M	V	V	V	V	V	V	V	V	V	V	V	V	V	V	V	V	V	V	V	V	-	V	V	9577	2	ATG	---,GTG	ATG	GTG	GTG	GTG	GTG	GTG	GTG	GTG	GTG	GTG	GTG	GTG	GTG	GTG	GTG	GTG	GTG
COL6A3	3260	2	A	-P	A	P	P	P	P	P	P	P	P	P	P	P	P	P	P	P	P	P	P	P	P	-	P	P	9778	2	GCT	---,CCC,CCG,CCT	GCT	CCT	CCT	CCT	CCT	CCT	CCT	CCT	CCT	CCT	CCT	CCT	CCT	CCT	CCT	CCT	CCT
DERA	175	2	A	-T	A	T	T	T	T	T	T	T	T	T	T	T	T	-	T	T	T	T	T	T	T	T	T	T	523	2	GCT	---,ACT	GCT	ACT	ACT	ACT	ACT	ACT	ACT	ACT	ACT	ACT	ACT	ACT	ACT	---	ACT	ACT	ACT
DERA	246	2	T	-S	T	S	S	S	S	S	S	S	S	S	S	S	S	-	S	S	S	S	S	S	S	S	S	S	736	2	ACT	---,TCT	ACT	TCT	TCT	TCT	TCT	TCT	TCT	TCT	TCT	TCT	TCT	TCT	TCT	---	TCT	TCT	TCT
DLGAP5	102	2	G	-E	G	E	E	E	E	E	E	E	E	E	E	E	E	E	E	E	E	-	E	E	E	E	E		304	2	GGG	---,GAA,GAG	GGG	GAG	GAG	GAG	GAG	GAG	GAG	GAG	GAG	GAG	GAG	GAG	GAG	GAA	GAA	GAA	GAG
DLGAP5	273	2	G	-RT	G	R	R	R	R	R	R	R	R	R	R	R	R	R	R	-	R	T	R	R	R	R	-		817	2	GGA	---,ACA,AGA	GGA	AGA	AGA	AGA	AGA	AGA	AGA	AGA	AGA	AGA	AGA	AGA	AGA	AGA	AGA	---	AGA
DLGAP5	345	2	N	-D	N	D	D	D	D	-	D	D	D	D	D	D	D	D	D	-	D	D	D	D	D	D	-		1033	2	AAT	---,GAT	AAT	GAT	GAT	GAT	GAT	---	GAT	GAT	GAT	GAT	GAT	GAT	GAT	GAT	GAT	---	GAT
DLGAP5	513	2	F	-HL	F	L	L	L	L	L	L	L	L	L	L	L	L	H	H	-	L	L	L	L	L	L	-		1537	2	TTC	---,CAT,CTC,CTG,CTT	TTC	CTC	CTC	CTC	CTC	CTC	CTC	CTC	CTC	CTC	CTC	CTC	CTC	CAT	CAT	---	CTC
DLGAP5	686	2	L	-AS	L	S	S	S	S	S	A	A	A	S	S	S	S	S	S	-	S	S	S	S	S	S	-		2056	2	TTA	---,GCA,TCA,TCG	TTA	TCA	TCA	TCA	TCA	TCG	GCA	GCA	GCA	TCA	TCA	TCA	TCA	TCA	TCA	---	TCA
DLGAP5	708	2	N	-S	N	S	S	S	S	S	S	S	S	S	S	S	S	S	S	-	S	S	S	S	S	S	-		2122	2	AAC	---,AGC	AAC	AGC	AGC	AGC	AGC	AGC	AGC	AGC	AGC	AGC	AGC	AGC	AGC	AGC	AGC	---	AGC
DNAH10	478	2	V	-FG	V	G	G	G	-	G	G	G	G	G	G	-	G	G	G	-	G	G	-	G	F	F	F	-	1432	2	GTC	---,GGC,TTC	GTC	GGC	GGC	GGC	---	GGC	GGC	GGC	GGC	GGC	GGC	---	GGC	GGC	GGC	---	GGC
DNAH10	566	2	I	-ST	I	T	T	T	-	T	T	T	T	T	T	T	T	T	T	T	T	T	T	T	S	S	S	-	1696	2	ATC	---,ACC,ACT,AGC	ATC	ACC	ACC	ACC	---	ACC	ACC	ACC	ACC	ACC	ACC	ACC	ACC	ACC	ACC	ACC	ACT
DNAH10	831	2	D	-A	D	A	A	A	-	A	A	A	-	A	A	A	A	A	A	A	A	A	A	A	A	A	A	-	2491	2	GAT	---,GCC,GCG,GCT	GAT	GCT	GCT	GCT	---	GCT	GCT	GCT	---	GCT	GCT	GCT	GCT	GCT	GCT	GCT	GCG
DNAH10	943	2	I	-V	I	V	V	V	-	V	V	V	V	-	-	V	V	V	V	V	V	V	V	V	V	V	V	-	2827	2	ATT	---,GTA,GTC,GTT	ATT	GTT	GTT	GTT	---	GTT	GTT	GTT	GTT	---	---	GTT	GTT	GTT	GTT	GTT	GTT
DNAH10	1256	2	A	-DE	A	D	D	D	-	E	D	D	D	D	D	D	D	D	D	D	D	D	D	D	E	D	D	-	3766	2	GCT	---,GAA,GAC,GAG,GAT	GCT	GAT	GAT	GAT	---	GAG	GAT	GAT	GAT	GAT	GAT	GAT	GAT	GAT	GAT	GAT	GAT
DNAH10	1281	2	K	-DENS	K	N	N	N	-	N	N	N	N	N	N	N	N	N	N	N	N	N	S	N	D	E	D	-	3841	2	AAA	---,AAC,AAT,AGT,GAA,GAC,GAT	AAA	AAC	AAC	AAC	---	AAT	AAC	AAC	AAC	AAC	AAC	AAC	AAC	AAC	AAC	AAC	AAC
DNAH10	1630	2	R	-G	R	G	G	G	-	G	G	G	G	G	G	G	G	G	G	G	G	G	G	G	G	G	G	-	4888	2	AGG	---,GGG,GGT	AGG	GGG	GGG	GGG	---	GGG	GGG	GGG	GGG	GGG	GGG	GGG	GGG	GGG	GGG	GGG	GGG
DNAH10	1735	2	I	-KMT	I	M	M	M	-	M	T	T	T	T	T	T	T	T	T	T	T	T	T	T	K	M	M	M	5203	2	ATA	---,AAG,ACG,ATG	ATA	ATG	ATG	ATG	---	ATG	ACG	ACG	ACG	ACG	ACG	ACG	ACG	ACG	ACG	ACG	ACG
DNAH10	2297	2	L	IV	L	V	V	V	V	V	V	V	V	V	V	V	V	V	V	V	V	V	V	V	I	I	I	I	6889	2	TTG	ATC,GTG	TTG	GTG	GTG	GTG	GTG	GTG	GTG	GTG	GTG	GTG	GTG	GTG	GTG	GTG	GTG	GTG	GTG
DNAH10	2434	1	D	E	D	E	E	E	E	E	E	E	E	E	E	E	E	E	E	E	E	E	E	E	E	E	E	E	7300	2	GAC	GAA,GAG	GAC	GAA	GAA	GAA	GAA	GAA	GAA	GAA	GAA	GAA	GAA	GAA	GAA	GAA	GAA	GAA	GAA
DNAH10	2532	1	R	K	R	K	K	K	K	K	K	K	K	K	K	K	K	K	K	K	K	K	K	K	K	K	K	K	7594	2	AGG	AAA,AAG	AGG	AAG	AAG	AAG	AAG	AAG	AAG	AAG	AAG	AAG	AAG	AAG	AAG	AAG	AAG	AAG	AAG
DNAH10	3897	2	S	DN	S	N	N	D	N	N	N	N	N	N	N	N	N	N	N	N	N	N	N	N	N	N	N	N	11689	2	AGT	AAT,GAT	AGT	AAT	AAT	GAT	AAT	AAT	AAT	AAT	AAT	AAT	AAT	AAT	AAT	AAT	AAT	AAT	AAT
DNAH10	4128	2	D	EG	D	G	G	G	G	G	G	G	G	G	G	G	G	G	G	G	G	G	G	E	G	G	G	G	12382	2	GAC	GAG,GGC,GGG,GGT	GAC	GGC	GGC	GGC	GGC	GGC	GGT	GGT	GGT	GGT	GGT	GGT	GGT	GGC	GGC	GGC	GGG
DNAH10	4166	1	C	Y	C	Y	Y	Y	Y	Y	Y	Y	Y	Y	Y	Y	Y	Y	Y	Y	Y	Y	Y	Y	Y	Y	Y	Y	12496	1	TGT	TAT	TGT	TAT	TAT	TAT	TAT	TAT	TAT	TAT	TAT	TAT	TAT	TAT	TAT	TAT	TAT	TAT	TAT
DNAH10	4986	1	H	Y	H	Y	Y	Y	Y	Y	Y	Y	Y	Y	Y	Y	Y	Y	Y	Y	Y	Y	Y	Y	Y	Y	Y	Y	14956	2	CAC	TAC,TAT	CAC	TAC	TAC	TAC	TAT	TAC	TAC	TAC	TAC	TAC	TAC	TAC	TAC	TAC	TAC	TAC	TAC
DNAH10	5088	2	V	FL	V	F	F	L	F	F	F	F	F	F	F	F	F	F	F	F	F	F	F	F	F	F	F	F	15262	2	GTC	CTC,TTC	GTC	TTC	TTC	CTC	TTC	TTC	TTC	TTC	TTC	TTC	TTC	TTC	TTC	TTC	TTC	TTC	TTC
DNAH3	1136	2	V	-DN	V	D	D	D	D	D	D	D			D	D	D		N	N		D	D	-		D	D	D	3406	2	GTT	---,AAT,GAC,GAT	GTT	GAT	GAT	GAT	GAT	GAT	GAT	GAT			GAT	GAT	GAT		AAT	AAT
DNAH3	1695	2	I	-V	I	V	V	V	-	V	V	V			V	V	V		V	V		V	V	V		V	V	V	5083	2	ATT	---,GTT	ATT	GTT	GTT	GTT	---	GTT	GTT	GTT			GTT	GTT	GTT		GTT	GTT
DNAH3	2813	2	V	-I	V	I	I	I	I	I	I	-			I	-	I		I	I		I	I	I		I	I	I	8437	2	GTT	---,ATC,ATT	GTT	ATT	ATT	ATT	ATT	ATT	ATT	---			ATT	---	ATT		ATT	ATT
DNAH3	3230	1	A	T	A	T	T	T	T	T	T	T			T	T	T		T	T		T	T	T		T	T	T	9688	2	GCC	ACC,ACT	GCC	ACC	ACC	ACC	ACC	ACC	ACC	ACC			ACC	ACC	ACC		ACT	ACC
DNAH3	3251	1	A	T	A	T	T	T	T	T	T	T			T	T	T		T	T		T	T	T		T	T	T	9751	2	GCA	ACA,ACG,ACT	GCA	ACA	ACA	ACA	ACA	ACG	ACA	ACA			ACA	ACA	ACA		ACA	ACA
DNAH3	3263	2	I	LM	I	M	M	M	M	M	M	M			M	M	M		M	M		L	L	L		M	M	M	9787	2	ATA	ATG,TTG	ATA	ATG	ATG	ATG	ATG	ATG	ATG	ATG			ATG	ATG	ATG		ATG	ATG
DNAH3	3759	2	I	-V	I	V	V	V	V	V	V	V			V	V	V		V	V		V	V	-		V	V	V	11275	2	ATC	---,GTC	ATC	GTC	GTC	GTC	GTC	GTC	GTC	GTC			GTC	GTC	GTC		GTC	GTC
DNAH3	3991	1	F	S	F	S	S	S	S	S	S	S			S	S	S		S	S		S	S	S		S	S	S	11971	2	TTC	TCC,TCT	TTC	TCC	TCC	TCC	TCC	TCC	TCT	TCT			TCT	TCT	TCT		TCT	TCT
DNAH3	4040	1	H	Q	H	Q	Q	Q	Q	Q	Q	Q			Q	Q	Q		Q	Q		Q	Q	Q		Q	Q	Q	12118	1	CAC	CAG	CAC	CAG	CAG	CAG	CAG	CAG	CAG	CAG			CAG	CAG	CAG		CAG	CAG
DRC7	22	2	W	-RS	W	R	R	R	-	R	R	R	R	R	R	R	R	R	R	R	R	R	R	R	S	R	R	R	64	2	TGG	---,AGC,CGA,CGG	TGG	CGG	CGG	CGG	---	CGG	CGG	CGG	CGG	CGG	CGG	CGG	CGG	CGG	CGG	CGG	CGG
DRC7	809	2	C	HR	C	R	R	R	R	R	R	R	R	R	R	R	R	R	R	R	R	R	R	R	R	R	H	R	2425	2	TGC	CAC,CGC	TGC	CGC	CGC	CGC	CGC	CGC	CGC	CGC	CGC	CGC	CGC	CGC	CGC	CGC	CGC	CGC	CGC
DRD5	39	2	S	AV	S	A	A	A	A			A		A	A	A	A						A				A	V	115	2	TCA	GCA,GCG,GTA	TCA	GCA	GCA	GCA	GCA			GCA		GCA	GCA	GCA	GCA
DRD5	74	1	N	K	N	K	K	K	K			K		K	K	K	K						K				K	K	220	1	AAC	AAG	AAC	AAG	AAG	AAG	AAG			AAG		AAG	AAG	AAG	AAG
DRD5	149	2	K	EV	K	V	E	E	E			E		E	E	E	E						E				E	E	445	2	AAG	GAG,GTG	AAG	GTG	GAG	GAG	GAG			GAG		GAG	GAG	GAG	GAG
DRD5	441	2	F	CRS	F	S	S	S	S			S		S	S	S	S						S				R	C	1321	2	TTC	CGC,TCC,TGC	TTC	TCC	TCC	TCC	TCC			TCC		TCC	TCC	TCC	TCC
E2F8	196	1	I	V	I	V	V	V	V	V	V	V	V	V	V	V	V	V	V	V	V	V	V	V	V	V	V	V	586	2	ATC	GTC,GTT	ATC	GTC	GTC	GTC	GTC	GTC	GTC	GTC	GTC	GTC	GTC	GTC	GTC	GTC	GTC	GTC	GTC
E2F8	662	2	S	CG	S	G	G	G	G	G	G	G	G	G	G	G	G	G	G	G	G	G	G	G	C	G	G	G	1984	2	AGT	GGT,TGC	AGT	GGT	GGT	GGT	GGT	GGT	GGT	GGT	GGT	GGT	GGT	GGT	GGT	GGT	GGT	GGT	GGT
E2F8	757	2	S	AP	S	P	P	P	P	P	P	P	P	P	P	P	P	P	P	P	P	P	P	P	P	A	A	A	2269	2	TCT	CCT,GCC	TCT	CCT	CCT	CCT	CCT	CCT	CCT	CCT	CCT	CCT	CCT	CCT	CCT	CCT	CCT	CCT	CCT
E2F8	772	2	A	ILV	A	V	V	V	V	I	V	V	V	V	V	V	V	V	V	V	V	V	I	V	V	L	L	I	2314	2	GCA	ATA,CTA,GTA,GTC	GCA	GTA	GTA	GTA	GTA	ATA	GTA	GTA	GTA	GTA	GTA	GTA	GTA	GTA	GTA	GTA	GTA
EFHB	132	2	P	-S	P	S	S	S	S	S	S	S	S	S	S	S	S	-	-	S	S	S	S	S	S		S	S	394	2	CCA	---,TCA,TCG	CCA	TCA	TCA	TCA	TCA	TCA	TCA	TCA	TCA	TCA	TCA	TCA	TCA	---	---	TCA	TCA
EFHB	407	2	V	-IL	V	I	I	I	I	I	I	I	I	I	I	I	I	I	-	I	I	I	I	I	I		L	L	1219	2	GTA	---,ATA,TTA	GTA	ATA	ATA	ATA	ATA	ATA	ATA	ATA	ATA	ATA	ATA	ATA	ATA	ATA	---	ATA	ATA
EFHB	408	2	L	-PS	L	P	P	P	P	P	P	P	P	P	P	P	P	P	-	P	P	P	P	P	P		S	S	1222	2	CTG	---,CCG,TCG	CTG	CCG	CCG	CCG	CCG	CCG	CCG	CCG	CCG	CCG	CCG	CCG	CCG	CCG	---	CCG	CCG
EFHB	458	2	T	-IM	T	I	I	I	I	I	I	I	I	I	I	I	I	I	-	I	M	M	M	M	I		I	I	1372	2	ACC	---,ATC,ATG	ACC	ATC	ATC	ATC	ATC	ATC	ATC	ATC	ATC	ATC	ATC	ATC	ATC	ATC	---	ATC	ATG
EFHB	740	1	Q	P	Q	P	P	P	P	P	P	P	P	P	P	P	P	P	P	P	P	P	P	P	P		P	P	2218	2	CAA	CCA,CCG	CAA	CCA	CCA	CCA	CCA	CCA	CCA	CCA	CCA	CCA	CCA	CCA	CCA	CCA	CCA	CCA	CCA
EFHB	909	2	L	-PS	L	P	P	P	P	P	P	P	P	P	P	S	P	P	P	P	P	P	P	P	P		-	S	2725	2	CTC	---,CCC,CCT,TCC,TCT	CTC	CCC	CCC	CCC	CCC	CCC	CCC	CCC	CCC	CCC	CCC	TCC	CCC	CCC	CCC	CCC	CCC
EFHC1	47	1	S	G	S	G	G	G	G	G	G	G	G	G	G	G	G	G	G	G	G	G	G	G	G	G	G	G	139	1	AGC	GGC	AGC	GGC	GGC	GGC	GGC	GGC	GGC	GGC	GGC	GGC	GGC	GGC	GGC	GGC	GGC	GGC	GGC
EFHC1	312	2	V	IM	V	M	M	M	M	M	M	M	M	M	M	M	M	M	M	M	I	M	M	I	M	M	M	M	934	2	GTG	ATA,ATG	GTG	ATG	ATG	ATG	ATG	ATG	ATG	ATG	ATG	ATG	ATG	ATG	ATG	ATG	ATG	ATG	ATA
ENPP1	289	2	K	QR	K	Q	Q	Q	Q	Q	Q	Q	Q	Q	Q	Q	Q	Q	Q	Q	Q	Q	Q	Q	R	Q	Q	Q	865	2	AAG	CAA,CAG,CGG	AAG	CAG	CAG	CAG	CAG	CAG	CAG	CAG	CAG	CAG	CAG	CAG	CAG	CAG	CAG	CAG	CAA
ENPP1	784	2	E	GKR	E	K	K	K	K	K	K	K	K	K	K	K	K	K	K	K	K	K	K	K	K	R	K	G	2350	2	GAA	AAA,AGA,GGA	GAA	AAA	AAA	AAA	AAA	AAA	AAA	AAA	AAA	AAA	AAA	AAA	AAA	AAA	AAA	AAA	AAA
ENPP1	923	2	C	-Y	C	Y	Y	Y	Y	Y	Y	Y	Y	Y	Y	Y	-	Y	Y	Y	Y	Y	Y	Y	Y	Y	Y	Y	2767	2	TGT	---,TAT	TGT	TAT	TAT	TAT	TAT	TAT	TAT	TAT	TAT	TAT	TAT	TAT	---	TAT	TAT	TAT	TAT
FANCI	921	2	S	-HN	S	N	N	N	N	N	N	N	N	N	N	N	N	N	-	N	N	N	N	N	H	N	N	N	2761	2	AGT	---,AAT,CAT	AGT	AAT	AAT	AAT	AAT	AAT	AAT	AAT	AAT	AAT	AAT	AAT	AAT	AAT	---	AAT	AAT
FANCI	988	2	E	DN	E	D	D	D	D	D	D	D	D	D	D	D	D	D	D	D	D	D	D	D	D	D	N	D	2962	2	GAA	AAC,GAC	GAA	GAC	GAC	GAC	GAC	GAC	GAC	GAC	GAC	GAC	GAC	GAC	GAC	GAC	GAC	GAC	GAC
FBXO48	11	2	L	PS	L	S	S	S		S	S	S	S	S	S	S	S	P	P	S	S	S	S	S	S	S	S		31	2	TTA	CCA,TCA	TTA	TCA	TCA	TCA		TCA	TCA	TCA	TCA	TCA	TCA	TCA	TCA	CCA	CCA	TCA	TCA
FGFBP1	2	1	K	R	K	R	R	R	R						R		R		R				R					R	4	1	AAG	AGG	AAG	AGG	AGG	AGG	AGG						AGG		AGG		AGG
FGFBP1	4	2	C	HR	C	R	R	R	R						R		H		H				H					H	10	2	TGT	CAC,CAT,CGT	TGT	CGT	CGT	CGT	CGT						CGT		CAT		CAT
FNDC1	185	2	A	-G	A	G	-	G	G	-	-	-	G	G	G	G	-	-	-	-	G	-	G	-	-	-	-	-	553	2	GCG	---,GGG	GCG	GGG	---	GGG	GGG	---	---	---	GGG	GGG	GGG	GGG	---	---	---	---	GGG
FNDC1	658	2	T	AS	T	A	A	A	A	A	A	A	A	A	A	A	A	A	A	A	A	A	A	A	A	A	A	S	1972	2	ACA	GCA,GCC,TCA	ACA	GCA	GCA	GCA	GCA	GCA	GCA	GCA	GCA	GCA	GCA	GCA	GCA	GCA	GCA	GCA	GCA
FNDC1	689	2	E	QR	E	Q	Q	Q	Q	Q	Q	Q	Q	Q	Q	Q	Q	Q	Q	Q	Q	Q	Q	Q	R	Q	Q	Q	2065	2	GAG	CAG,CGG	GAG	CAG	CAG	CAG	CAG	CAG	CAG	CAG	CAG	CAG	CAG	CAG	CAG	CAG	CAG	CAG	CAG
FNDC1	982	2	S	AG	S	G	G	G	G	G	G	G	A	G	G	G	G	G	G	G	G	G	G	G	G	G	G	G	2944	2	AGC	GCC,GGC,GGG,GGT	AGC	GGC	GGC	GGC	GGC	GGC	GGC	GGC	GCC	GGC	GGC	GGC	GGT	GGC	GGC	GGC	GGC
FNDC1	987	1	K	R	K	R	R	R	R	R	R	R	R	R	R	R	R	R	R	R	R	R	R	R	R	R	R	R	2959	1	AAG	AGG	AAG	AGG	AGG	AGG	AGG	AGG	AGG	AGG	AGG	AGG	AGG	AGG	AGG	AGG	AGG	AGG	AGG
FNDC1	1155	2	D	APS	D	A	A	A	A	A	A	A	A	A	A	A	A	A	A	A	A	A	A	A	S	P	P	P	3463	2	GAC	CCC,GCC,TCC	GAC	GCC	GCC	GCC	GCC	GCC	GCC	GCC	GCC	GCC	GCC	GCC	GCC	GCC	GCC	GCC	GCC
FNDC1	1252	1	Q	E	Q	E	E	E	E	E	E	E	E	E	E	E	E	E	E	E	E	E	E	E	E	E	E	E	3754	1	CAA	GAA	CAA	GAA	GAA	GAA	GAA	GAA	GAA	GAA	GAA	GAA	GAA	GAA	GAA	GAA	GAA	GAA	GAA
FNDC1	1385	2	A	-GS	A	G	G	G	G	G	G	G	G	G	G	G	G	G	G	G	S	S	S	S	-	G	G	G	4153	2	GCC	---,AGC,GGC	GCC	GGC	GGC	GGC	GGC	GGC	GGC	GGC	GGC	GGC	GGC	GGC	GGC	GGC	GGC	GGC	AGC
FNDC1	1563	2	F	-SY	F	S	S	S	S	S	-	-	-	-	-	-	-	-	-	-	S	S	S	S	S	Y	Y	S	4687	2	TTC	---,TAC,TCC	TTC	TCC	TCC	TCC	TCC	TCC	---	---	---	---	---	---	---	---	---	---	TCC
FNDC1	1724	2	M	-T	M	T	T	T	-	T	T	T	T	T	T	T	T	T	T	T	T	T	T	T	-	T	T	T	5170	2	ATG	---,ACA,ACG	ATG	ACG	ACG	ACG	---	ACG	ACG	ACG	ACG	ACG	ACA	ACG	ACG	ACA	ACA	ACG	ACG
FNDC1	1794	2	T	-EKN	T	K	K	K	N	K	K	K	K	K	K	K	K	K	K	K	K	K	K	K	-	-	E	E	5380	2	ACA	---,AAA,AAT,GAA	ACA	AAA	AAA	AAA	AAT	AAA	AAA	AAA	AAA	AAA	AAA	AAA	AAA	AAA	AAA	AAA	AAA
GDPD4	240	2	C	-HQRY	C	R	R	R	H	R	R	R	R	R	R	R	R	R	R	R	R	R	H	-	Q	Y	H	H	718	2	TGT	---,CAG,CAT,CGT,TAT	TGT	CGT	CGT	CGT	CAT	CGT	CGT	CGT	CGT	CGT	CGT	CGT	CGT	CGT	CGT	CGT	CGT
GDPD4	271	2	Q	KR	Q	K	K	K	K	K	K	K	K	K	K	K	K	K	K	K	K	K	K	K	K	R	R	R	811	2	CAA	AAA,AGA,CGA	CAA	AAA	AAA	AAA	AAA	AAA	AAA	AAA	AAA	AAA	AAA	AAA	AAA	AAA	AAA	AAA	AAA
GDPD4	295	2	G	-CS	G	S	S	S	S	S	S	S	S	S	S	S	S	S	S	S	C	C	S	S	-	C	C	C	883	2	GGT	---,AGC,AGT,TGT	GGT	AGT	AGT	AGT	AGT	AGT	AGT	AGT	AGT	AGT	AGT	AGT	AGT	AGT	AGT	AGT	TGT
GDPD4	401	1	C	F	C	F	F	F	F	F	F	F	F	F	F	F	F	F	F	F	F	F	F	F	F	F	F	F	1201	2	TGC	TTC,TTT	TGC	TTC	TTC	TTT	TTC	TTC	TTC	TTC	TTC	TTC	TTC	TTC	TTC	TTC	TTC	TTC	TTC
GDPD4	668	1	T	-	T	-	-	-	-	-	-	-	-	-	-	-	-	-	-	-	-	-	-	-	-	-	-	-	2002	1	ACT	---	ACT	---	---	---	---	---	---	---	---	---	---	---	---	---	---	---	---
GDPD4	669	1	Q	-	Q	-	-	-	-	-	-	-	-	-	-	-	-	-	-	-	-	-	-	-	-	-	-	-	2005	1	CAG	---	CAG	---	---	---	---	---	---	---	---	---	---	---	---	---	---	---	---
GDPD4	670	1	S	-	S	-	-	-	-	-	-	-	-	-	-	-	-	-	-	-	-	-	-	-	-	-	-	-	2008	1	AGT	---	AGT	---	---	---	---	---	---	---	---	---	---	---	---	---	---	---	---
GDPD4	671	1	G	-	G	-	-	-	-	-	-	-	-	-	-	-	-	-	-	-	-	-	-	-	-	-	-	-	2011	1	GGA	---	GGA	---	---	---	---	---	---	---	---	---	---	---	---	---	---	---	---
GDPD4	672	1	S	-	S	-	-	-	-	-	-	-	-	-	-	-	-	-	-	-	-	-	-	-	-	-	-	-	2014	1	AGT	---	AGT	---	---	---	---	---	---	---	---	---	---	---	---	---	---	---	---
GDPD4	673	1	K	-	K	-	-	-	-	-	-	-	-	-	-	-	-	-	-	-	-	-	-	-	-	-	-	-	2017	1	AAG	---	AAG	---	---	---	---	---	---	---	---	---	---	---	---	---	---	---	---
GDPD4	674	1	N	-	N	-	-	-	-	-	-	-	-	-	-	-	-	-	-	-	-	-	-	-	-	-	-	-	2020	1	AAT	---	AAT	---	---	---	---	---	---	---	---	---	---	---	---	---	---	---	---
GDPD4	675	1	E	-	E	-	-	-	-	-	-	-	-	-	-	-	-	-	-	-	-	-	-	-	-	-	-	-	2023	1	GAG	---	GAG	---	---	---	---	---	---	---	---	---	---	---	---	---	---	---	---
GDPD4	676	1	E	-	E	-	-	-	-	-	-	-	-	-	-	-	-	-	-	-	-	-	-	-	-	-	-	-	2026	1	GAA	---	GAA	---	---	---	---	---	---	---	---	---	---	---	---	---	---	---	---
GDPD4	677	1	D	-	D	-	-	-	-	-	-	-	-	-	-	-	-	-	-	-	-	-	-	-	-	-	-	-	2029	1	GAT	---	GAT	---	---	---	---	---	---	---	---	---	---	---	---	---	---	---	---
GDPD4	678	1	R	-	R	-	-	-	-	-	-	-	-	-	-	-	-	-	-	-	-	-	-	-	-	-	-	-	2032	1	AGA	---	AGA	---	---	---	---	---	---	---	---	---	---	---	---	---	---	---	---
GPATCH1	602	2	L	-P	L	P	P	P	P	P	P	P	P	P	P	P	P	P	P	-	P	P	P	P		P	P	P	1804	2	CTC	---,CCC,CCT	CTC	CCC	CCC	CCC	CCC	CCC	CCC	CCC	CCC	CCC	CCC	CCC	CCC	CCC	CCC	---	CCC
GPATCH1	838	1	E	G	E	G	G	G	G	G	G	G	G	G	G	G	G	G	G	G	G	G	G	G		G	G	G	2512	2	GAG	GGC,GGG,GGT	GAG	GGG	GGG	GGG	GGG	GGG	GGG	GGG	GGG	GGG	GGG	GGG	GGG	GGG	GGG	GGG	GGG
GPATCH1	858	1	L	S	L	S	S	S	S	S	S	S	S	S	S	S	S	S	S	S	S	S	S	S		S	S	S	2572	1	TTA	TCA	TTA	TCA	TCA	TCA	TCA	TCA	TCA	TCA	TCA	TCA	TCA	TCA	TCA	TCA	TCA	TCA	TCA
GPATCH1	867	1	D	G	D	G	G	G	G	G	G	G	G	G	G	G	G	G	G	G	G	G	G	G		G	G	G	2599	2	GAT	GGC,GGT	GAT	GGT	GGT	GGT	GGT	GGT	GGT	GGT	GGT	GGT	GGT	GGT	GGT	GGT	GGT	GGT	GGT
GPLD1	190	2	I	-AT	I	T	T	T	T	T	T	T	T	T	T	T	-	T	T	T	T	T	T	T	T	A	-	T	568	2	ATC	---,ACC,ACT,GCC	ATC	ACC	ACC	ACC	ACC	ACC	ACC	ACC	ACC	ACC	ACC	ACC	---	ACC	ACC	ACC	ACC
GPLD1	263	1	L	I	L	I	I	I	I	I	I	I	I	I	I	I	I	I	I	I	I	I	I	I	I	I	I	I	787	2	CTT	ATA,ATT	CTT	ATT	ATT	ATT	ATT	ATT	ATT	ATT	ATT	ATT	ATT	ATT	ATA	ATT	ATT	ATT	ATT
GPLD1	801	2	K	AT	K	T	T	T	T	T	T	T	T	T	T	T	T	T	T	T	T	T	T	T	T	A	T	T	2401	2	AAA	ACA,ACC,ACG,GCG	AAA	ACA	ACA	ACA	ACA	ACA	ACC	ACC	ACC	ACC	ACC	ACC	ACC	ACC	ACC	ACC	ACG
GPR35	339	2	I	MT	I	M	M	M	M		M	M	M	M	M	M	M	M		M	M	T	M	M					1015	2	ATT	ACG,ATG	ATT	ATG	ATG	ATG	ATG		ATG	ATG	ATG	ATG	ATG	ATG	ATG	ATG		ATG	ATG
GPR35	407	1	L	V	L	V	V	V	V		V	V	V	V	V	V	V	V		V	V	V	V	V					1219	2	CTG	GTA,GTG	CTG	GTG	GTG	GTG	GTG		GTG	GTG	GTG	GTG	GTG	GTG	GTG	GTG		GTA	GTG
HAUS8	103	1	A	-	A	-	-	-	-	-	-	-	-	-	-	-	-	-	-	-	-		-		-	-	-	-	307	1	GCA	---	GCA	---	---	---	---	---	---	---	---	---	---	---	---	---	---	---	---
HAUS8	466	2	L	-AIV	L	V	V	V	V	V	V	V	V	V	-	-	-	-	V	V	A		A		-	-	-	I	1396	2	CTC	---,ATC,GCC,GTC	CTC	GTC	GTC	GTC	GTC	GTC	GTC	GTC	GTC	GTC	---	---	---	---	GTC	GTC	GCC
HEATR6	49	2	W	-LV	W		L	L	L		L	L	L	-	L	L	L	L	L	L	V	V	V	V	L	L	V	L	145	2	TGG	---,CTC,CTG,GTC,GTG,TTG	TGG		TTG	TTG	TTG		TTG	TTG	TTG	---	TTG	TTG	TTG	TTG	TTG	TTG	GTG
HEATR6	52	2	V	-EGR	V		G	G	G		G	G	G	-	E	E	E	G	G	G	R	R	R	R	G	G	G	G	154	2	GTG	---,AGG,CGG,GAG,GGA,GGG	GTG		GGG	GGA	GGG		GGG	GGG	GGG	---	GAG	GAG	GAG	GGG	GGG	GGG	AGG
HEPH	49	2	V	-A	V	A	-	A	-	A	A	A	A	A	A	A	A	-	-	-	-	-	-	A	-	A	A	-	145	2	GTG	---,GCA	GTG	GCA	---	GCA	---	GCA	GCA	GCA	GCA	GCA	GCA	GCA	GCA	---	---	---	---
HEPH	960	2	V	GS	V	G	G	G	G	S	G	G	G	G	G	G	G	G	G	G	G	G	S	G	G	G	G	G	2878	2	GTC	AGC,AGT,GGC,GGT	GTC	GGC	GGC	GGC	GGC	AGC	GGC	GGC	GGC	GGC	GGC	GGC	GGC	GGC	GGC	GGC	GGT
HEPH	971	2	V	-L	V	L	L	L	L	-	L	L	L	L	L	L	L	-	-	L	L	L	L	L	L	L	L	L	2911	2	GTC	---,CTC	GTC	CTC	CTC	CTC	CTC	---	CTC	CTC	CTC	CTC	CTC	CTC	CTC	---	---	CTC	CTC
HEPH	1224	2	V	-IT	V	I	I	I	I	I	T	T	T	T	T	T	T	-	-	T	T	T	T	T	T	T	-	T	3670	2	GTC	---,ACA,ACC,ATC	GTC	ATC	ATC	ATC	ATC	ATC	ACC	ACC	ACC	ACC	ACC	ACC	ACC	---	---	ACC	ACC
HMGXB3	887	2	A	LV	A	V	V	V	V	V	L	V	V	V	V	V	V	V	V	V	V	V	V	V	V	V	V	V	2659	2	GCT	CTC,GTT	GCT	GTT	GTT	GTT	GTT	GTT	CTC	GTT	GTT	GTT	GTT	GTT	GTT	GTT	GTT	GTT	GTT
HMGXB3	1640	2	L	-IT	L	I	I	I	I	I	T	T	T	T	T	T	T	T	T	T	T	T	T	T	T	-	-	-	4918	2	CTA	---,ACA,ATA	CTA	ATA	ATA	ATA	ATA	ATA	ACA	ACA	ACA	ACA	ACA	ACA	ACA	ACA	ACA	ACA	ACA
HMGXB3	1677	2	G	NS	G	S	S	S	S	S	S	S	S	S	S	S	S	S	S	S	S	S	S	S	S	S	S	N	5029	2	GGT	AAT,AGC,AGT	GGT	AGT	AGT	AGT	AGT	AGT	AGT	AGT	AGT	AGT	AGT	AGT	AGT	AGT	AGT	AGT	AGT
HMGXB3	1752	2	A	MTV	A	T	T	T	T	T	T	T	T	T	T	T	T	T	T	T	T	T	T	T	V	M	V	V	5254	2	GCA	ACA,ATG,GTG	GCA	ACA	ACA	ACA	ACA	ACA	ACA	ACA	ACA	ACA	ACA	ACA	ACA	ACA	ACA	ACA	ACA
IBA57	18	2	V	-AX	V	A	-	A	A	A	A	-	A	X		A	A	-	A	-	A	A	A	A	A	A	A	-	52	2	GTC	---,GCC,GCT,NNN	GTC	GCC	---	GCC	GCC	GCT	GCC	---	GCC	NNN		GCC	GCC	---	GCC	---	GCC
IBSP	268	2	D	-AG	D	G	G	G	G	G	G	G	G	G	G	G	G	G	G	G	A	A	G	G	G	-	G	G	802	2	GAC	---,GCC,GGA,GGC	GAC	GGC	GGC	GGC	GGC	GGC	GGC	GGC	GGC	GGC	GGC	GGC	GGC	GGC	GGC	GGC	GCC
IBSP	274	2	R	-G	R	G	G	G	G	G	G	G	G	G	G	G	G	G	G	G	G	G	G	G	G	-	-	-	820	2	AGG	---,GGG	AGG	GGG	GGG	GGG	GGG	GGG	GGG	GGG	GGG	GGG	GGG	GGG	GGG	GGG	GGG	GGG	GGG
INPP5E	215	2	P	-L	P	L	-	L	L	L	L	-	L	L	L	L	L	L	-	-	L	L	L	L	-	-	-	-	643	2	CCG	---,CTG	CCG	CTG	---	CTG	CTG	CTG	CTG	---	CTG	CTG	CTG	CTG	CTG	CTG	---	---	CTG
INPP5E	692	2	V	AT	V	A	A	A	A	A	A	A	A	A	A	A	A	A	A	A	A	A	A	A	A	A	A	T	2074	2	GTC	ACC,GCC,GCG	GTC	GCC	GCC	GCC	GCC	GCC	GCC	GCC	GCC	GCC	GCC	GCC	GCC	GCC	GCC	GCC	GCC
KCNS3	450	1	T	A	T	A	A	A	A	A	A	A	A	A	A	A	A	A	A	A	A	A	A	A	A		A	A	1348	1	ACC	GCC	ACC	GCC	GCC	GCC	GCC	GCC	GCC	GCC	GCC	GCC	GCC	GCC	GCC	GCC	GCC	GCC	GCC
KIAA1841	227	1	I	V	I	V	V	V	V	V	V	V	V	V	V	V	V	V	V	V	V	V	V	V	V	V	V	V	679	1	ATT	GTT	ATT	GTT	GTT	GTT	GTT	GTT	GTT	GTT	GTT	GTT	GTT	GTT	GTT	GTT	GTT	GTT	GTT
KIAA1841	316	1	S	T	S	T	T	T	T	T	T	T	T	T	T	T	T	T	T	T	T	T	T	T	T	T	T	T	946	1	TCA	ACA	TCA	ACA	ACA	ACA	ACA	ACA	ACA	ACA	ACA	ACA	ACA	ACA	ACA	ACA	ACA	ACA	ACA
KIAA1841	389	2	R	-H	R	H	H	H	H	H	H	-	H	H	H	H	H	H	H	H	H	H	H	H	H	H	H	H	1165	2	CGT	---,CAT	CGT	CAT	CAT	CAT	CAT	CAT	CAT	---	CAT	CAT	CAT	CAT	CAT	CAT	CAT	CAT	CAT
KIAA1841	717	2	M	-V	M	V	V	V	V	V	V	V	V	V	V	V	V	V	V	V	V	V	V	V	-	V	V	V	2149	2	ATG	---,GTG	ATG	GTG	GTG	GTG	GTG	GTG	GTG	GTG	GTG	GTG	GTG	GTG	GTG	GTG	GTG	GTG	GTG
KIF27	20	1	A	V	A				V	V	V	V	V	V	V	V	V	V	V	V	V	V	V	V	V	V	V	V	58	1	GCT	GTT	GCT				GTT	GTT	GTT	GTT	GTT	GTT	GTT	GTT	GTT	GTT	GTT	GTT	GTT
KIF27	190	1	G	D	G				D	D	D	D	D	D	D	D	D	D	D	D	D	D	D	D	D	D	D	D	568	1	GGT	GAT	GGT				GAT	GAT	GAT	GAT	GAT	GAT	GAT	GAT	GAT	GAT	GAT	GAT	GAT
KIF27	956	2	I	-L	I				-	L	L	L	L	L	L	L	L	L	-	L	L	L	L	L	L	L	L	L	2866	2	ATA	---,CTA,TTA	ATA				---	CTA	TTA	TTA	TTA	TTA	TTA	TTA	CTA	CTA	---	CTA	CTA
KIF27	1026	1	A	E	A				E	E	E	E	E	E	E	E	E	E	E	E	E	E	E	E	E	E	E	E	3076	1	GCA	GAA	GCA				GAA	GAA	GAA	GAA	GAA	GAA	GAA	GAA	GAA	GAA	GAA	GAA	GAA
KIF27	1115	2	N	ST	N				S	S	S	S	S	S	S	S	S	S	S	S	T	S	S	S	S	S	S	S	3343	2	AAT	ACT,AGC,AGT	AAT				AGT	AGT	AGT	AGT	AGT	AGT	AGT	AGT	AGT	AGT	AGT	AGT	ACT
KIF27	1151	1	R	K	R				K	K	K	K	K	K	K	K	K	K	K	K	K	K	K	K	K	K	K	K	3451	1	AGG	AAG	AGG				AAG	AAG	AAG	AAG	AAG	AAG	AAG	AAG	AAG	AAG	AAG	AAG	AAG
KIF27	1190	1	T	A	T				A	A	A	A	A	A	A	A	A	A	A	A	A	A	A	A	A	A	A	A	3568	2	ACT	GCC,GCT	ACT				GCT	GCT	GCT	GCT	GCT	GCT	GCT	GCT	GCT	GCT	GCT	GCT	GCT
KIF27	1321	2	Q	-H	Q				-	H	H	H	H	H	H	H	H	H	H	H	H	H	H	H	H	H	H	H	3961	2	CAA	---,CAT	CAA				---	CAT	CAT	CAT	CAT	CAT	CAT	CAT	CAT	CAT	CAT	CAT	CAT
KIF27	1429	2	R	-HQ	R				Q	Q	Q	Q	Q	Q	Q	Q	Q	H	H	Q	Q	Q	Q	-	Q	Q	Q	Q	4285	2	CGA	---,CAA,CAG,CAT	CGA				CAA	CAA	CAA	CAA	CAA	CAA	CAA	CAA	CAG	CAT	CAT	CAG	CAG
KMT5B	582	2	N	-D	N	D	D	D	D	D	D	D	D	D	D	D	D	D	D	D	D	D	D	D	-	D	D	D	1744	2	AAT	---,GAC,GAT	AAT	GAT	GAT	GAT	GAT	GAT	GAT	GAT	GAT	GAT	GAT	GAT	GAT	GAT	GAT	GAT	GAT
KMT5B	599	2	L	-P	L	P	P	P	P	P	P	P	P	P	P	P	P	P	P	P	-	-	-	-	-	-	-	-	1795	2	CTG	---,CCA,CCG	CTG	CCG	CCG	CCG	CCG	CCA	CCA	CCA	CCA	CCA	CCA	CCA	CCA	CCA	CCA	CCA	---
LARP1B	848	2	R	-H	R	H	H	H	H	H	H	H	H	H	H	H	H	H		H	H	H	H	H	-	H	H	H	2542	2	CGT	---,CAT	CGT	CAT	CAT	CAT	CAT	CAT	CAT	CAT	CAT	CAT	CAT	CAT	CAT	CAT		CAT	CAT
LARP1B	851	2	G	-RT	G	R	R	R	R	T	R	R	R	R	R	R	R	R		R	R	R	R	R	-	R	R	R	2551	2	GGA	---,ACA,AGA	GGA	AGA	AGA	AGA	AGA	ACA	AGA	AGA	AGA	AGA	AGA	AGA	AGA	AGA		AGA	AGA
LARP1B	1147	2	I	-T	I	T	T	T	T	T	T	T	T	T	T	T	T	T		T	T	T	T	T	-	T	T	-	3439	2	ATT	---,ACT	ATT	ACT	ACT	ACT	ACT	ACT	ACT	ACT	ACT	ACT	ACT	ACT	ACT	ACT		ACT	ACT
LRRN4	172	2	T	-AP	T	A	A	A	A	-	A	-	A	A		A	A	A	A	-	A	A	A	A	-	A	A	P	514	2	ACC	---,CCC,GCA,GCC	ACC	GCC	GCC	GCC	GCC	---	GCC	---	GCC	GCC		GCC	GCC	GCC	GCC	---	GCC
LRRN4	483	1	T	P	T	P	P	P	P	P	P	P	P	P		P	P	P	P	P	P	P	P	P	P	P	P	P	1447	2	ACC	CCC,CCT	ACC	CCC	CCC	CCC	CCC	CCC	CCC	CCC	CCC	CCC		CCC	CCC	CCC	CCC	CCC	CCC
LRRN4	562	2	E	GRS	E	G	G	G	G	G	G	G	G	G		G	G	G	G	G	G	G	S	G	G	R	R	R	1684	2	GAG	AGC,AGG,GGC,GGG	GAG	GGG	GGG	GGG	GGG	GGG	GGG	GGG	GGG	GGG		GGG	GGG	GGG	GGG	GGG	GGC
LRRN4	612	2	L	HPS	L	P	P	P	P	P	P	P	P	P		P	P	P	P	P	P	P	P	P	S	P	P	H	1834	2	CTT	CAT,CCC,CCT,TCT	CTT	CCT	CCT	CCT	CCT	CCT	CCT	CCT	CCT	CCT		CCT	CCT	CCT	CCT	CCT	CCT
LRRN4	813	2	G	HR	G	R	R	R	R	R	R	R	R	R		R	R	R	R	R	R	H	R	R	R	R	H	H	2437	2	GGC	CAC,CGC	GGC	CGC	CGC	CGC	CGC	CGC	CGC	CGC	CGC	CGC		CGC	CGC	CGC	CGC	CGC	CGC
LYVE1	315	2	S	-P	S	P	P	P	-	P	P	P	P	P	P	P	P	P	P	P	P	P	P	P	P	P	P	P	943	2	TCC	---,CCC	TCC	CCC	CCC	CCC	---	CCC	CCC	CCC	CCC	CCC	CCC	CCC	CCC	CCC	CCC	CCC	CCC
LZTFL1	125	1	D	E	D	E	E	E	E	E	E	E	E	E	E	E	E	E	E	E	E	E	E	E		E	E	E	373	1	GAC	GAG	GAC	GAG	GAG	GAG	GAG	GAG	GAG	GAG	GAG	GAG	GAG	GAG	GAG	GAG	GAG	GAG	GAG
MEI4	432	2	R	-KT	R	K	K	K	K	K	K	-	K	K	K	K	K	-	-	K	K	K	K	K	-	K	T		1294	2	AGA	---,AAA,ACT	AGA	AAA	AAA	AAA	AAA	AAA	AAA	---	AAA	AAA	AAA	AAA	AAA	---	---	AAA	AAA
MFSD4B	617	2	V	-DILT	V	I	I	I		I	-	T	T	T	-	-	-	T	T	T	-	I	-	-	L	-	D		1849	2	GTT	---,ACT,ATT,CTT,GAT	GTT	ATT	ATT	ATT		ATT	---	ACT	ACT	ACT	---	---	---	ACT	ACT	ACT	---
MTFR1	239	2	T	IKLV	T	I	I	I	I	I	V	V	V	V	V	V	V	V		V	I		I	I	K	V	L	V	715	2	ACA	AAA,ATA,CTA,GTA	ACA	ATA	ATA	ATA	ATA	ATA	GTA	GTA	GTA	GTA	GTA	GTA	GTA	GTA		GTA	ATA
MUM1	243	2	L	-PQR	L	P	P	P	P	P	R	R	Q	R	R	R	R	R	R	R	P		P	P	-	Q	Q	Q	727	2	CTG	---,CAA,CAG,CCC,CCG,CGG	CTG	CCG	CCG	CCG	CCG	CCG	CGG	CGG	CAG	CGG	CGG	CGG	CGG	CGG	CGG	CGG	CCC
MUM1	353	2	P	-L	P	L	L	L	L	L	L	L	L	L	L	L	L	L	L	L	L		L	L	-	L	L	L	1057	2	CCG	---,CTG,TTG	CCG	CTG	CTG	CTG	CTG	CTG	CTG	CTG	CTG	CTG	CTG	CTG	TTG	CTG	CTG	CTG	CTG
MUM1	523	1	D	A	D	A	A	A	A	A	A	A	A	A	A	A	A	A	A	A	A		A	A	A	A	A	A	1567	1	GAC	GCC	GAC	GCC	GCC	GCC	GCC	GCC	GCC	GCC	GCC	GCC	GCC	GCC	GCC	GCC	GCC	GCC	GCC
MUM1	586	1	L	F	L	F	F	F	F	F	F	F	F	F	F	F	F	F	F	F	F		F	F	F	F	F	F	1756	2	CTT	TTC,TTT	CTT	TTT	TTT	TTT	TTT	TTT	TTT	TTT	TTT	TTT	TTT	TTT	TTT	TTT	TTT	TTT	TTT
NBN	185	1	E	Q	E	Q	Q	Q	Q	Q	Q	Q	Q	Q	Q	Q	Q	Q	Q	Q	Q	Q		Q	Q	Q			553	1	GAG	CAG	GAG	CAG	CAG	CAG	CAG	CAG	CAG	CAG	CAG	CAG	CAG	CAG	CAG	CAG	CAG	CAG	CAG
NBN	346	1	V	L	V	L	L	L	L	L	L	L	L	L	L	L	L	L	L	L	L	L		L	L	L			1036	1	GTG	TTG	GTG	TTG	TTG	TTG	TTG	TTG	TTG	TTG	TTG	TTG	TTG	TTG	TTG	TTG	TTG	TTG	TTG
NDC1	128	2	R	-G	R	G	G	G	G	G	G	G	G	G	G	G	G	G	G	G	G	-	G	G	G	G	-	-	382	2	CGG	---,GGG	CGG	GGG	GGG	GGG	GGG	GGG	GGG	GGG	GGG	GGG	GGG	GGG	GGG	GGG	GGG	GGG	GGG
NDC1	359	1	T	A	T	A	A	A	A	A	A	A	A	A	A	A	A	A	A	A	A	A	A	A	A	A	A	A	1075	1	ACT	GCT	ACT	GCT	GCT	GCT	GCT	GCT	GCT	GCT	GCT	GCT	GCT	GCT	GCT	GCT	GCT	GCT	GCT
NOLC1	342	2	I	-V	I	V	V	V	V	V	V	V	V	V	V	-	V		V	V	V	V	V	V	V	V		V	1024	2	ATA	---,GTA,GTC	ATA	GTA	GTA	GTA	GTA	GTA	GTA	GTA	GTA	GTA	GTA	---	GTA		GTA	GTA	GTA
NOLC1	405	2	T	-A	T	-	-	A	-	A	-	-	-	-	-	-	-		-	-	-	-	-	-	-	-		-	1213	2	ACC	---,GCC	ACC	---	---	GCC	---	GCC	---	---	---	---	---	---	---		---	---	---
NOLC1	411	2	A	-E	A	-	-	E	-	E	-	-	-	-	-	-	-		-	-	-	-	-	-	-	-		-	1231	2	GCA	---,GAA	GCA	---	---	GAA	---	GAA	---	---	---	---	---	---	---		---	---	---
NOLC1	439	2	T	-AV	T	A	A	A	A	A	A	A	A	A	A	-	A		A	A	A	A	A	-	A	A		V	1315	2	ACC	---,GCC,GTC	ACC	GCC	GCC	GCC	GCC	GCC	GCC	GCC	GCC	GCC	GCC	---	GCC		GCC	GCC	GCC
NOLC1	658	2	L	PS	L	P	P	P	P	P	P	P	P	P	P	P	P		P	P	P	P	P	P	S	P		P	1972	2	CTA	CCA,CCG,TCC	CTA	CCA	CCA	CCA	CCA	CCA	CCG	CCG	CCG	CCG	CCG	CCG	CCA		CCA	CCA	CCA
NOLC1	733	2	N	ST	N	S	S	S	S	S	S	S	S	S	S	S	S		S	S	S	S	S	S	S	T		T	2197	2	AAC	ACC,AGC	AAC	AGC	AGC	AGC	AGC	AGC	AGC	AGC	AGC	AGC	AGC	AGC	AGC		AGC	AGC	AGC
NOLC1	752	1	L	P	L	P	P	P	P	P	P	P	P	P	P	P	P		P	P	P	P	P	P	P	P		P	2254	2	CTC	CCC,CCT	CTC	CCC	CCC	CCC	CCC	CCC	CCC	CCC	CCC	CCT	CCC	CCC	CCC		CCC	CCC	CCC
NPHP1	571	2	W	-PQR	W	R	R	R	Q	Q	Q	P	P	P	P	P	Q	Q	Q	Q	Q	-	-	-	Q	Q	Q	Q	1711	2	TGG	---,CAA,CAG,CCA,CGG	TGG	CGG	CGG	CGG	CAG	CAG	CAA	CCA	CCA	CCA	CCA	CCA	CAA	CAG	CAG	CAG	CAG
NPHP1	668	2	P	-S	P	S	S	S	S	S	-	S	S	S	S	S	S	S	S	S	S	-	-	-	S	S	S	S	2002	2	CCC	---,TCC,TCT	CCC	TCC	TCC	TCC	TCC	TCC	---	TCC	TCC	TCC	TCC	TCC	TCC	TCC	TCC	TCC	TCC
NPHP1	680	2	A	-V	A	V	V	-	V	V	-	V	V	-	-	V	-	V	V	V	V	-	-	-	-	V	-	-	2038	2	GCG	---,GTG,GTT	GCG	GTG	GTG	---	GTG	GTG	---	GTG	GTG	---	---	GTG	---	GTG	GTG	GTG	GTG
NPHP1	686	2	V	-IST	V	I	I	-	I	I	-	S	S	-	-	I	-	I	I	I	I	-	-	-	-	T	-	-	2056	2	GTT	---,ACC,AGT,ATT	GTT	ATT	ATT	---	ATT	ATT	---	AGT	AGT	---	---	ATT	---	ATT	ATT	ATT	ATT
NPHP1	688	2	H	-DGY	H	D	D	-	D	D	-	G	G	-	-	D	-	D	D	D	D	-	-	-	-	Y	-	-	2062	2	CAT	---,GAT,GGT,TAT	CAT	GAT	GAT	---	GAT	GAT	---	GGT	GGT	---	---	GAT	---	GAT	GAT	GAT	GAT
NPHP1	690	2	S	-L	S	L	L	-	L	-	-	L	L	-	-	L	-	L	L	L	L	-	-	-	-	L	-	-	2068	2	TCG	---,TTG	TCG	TTG	TTG	---	TTG	---	---	TTG	TTG	---	---	TTG	---	TTG	TTG	TTG	TTG
NPHP1	708	2	T	-S	T	S	S	-	S	S	-	S	S	-	-	S	-	S	S	S	S	-	-	-	-	-	-	-	2122	2	ACC	---,AGC	ACC	AGC	AGC	---	AGC	AGC	---	AGC	AGC	---	---	AGC	---	AGC	AGC	AGC	AGC
NPHP1	1273	2	G	-E	G	E	E	-	E	E	E	E	E	E	E	E	E	E	-	E	E	E	-	-	E	E	-	E	3817	2	GGA	---,GAA	GGA	GAA	GAA	---	GAA	GAA	GAA	GAA	GAA	GAA	GAA	GAA	GAA	GAA	---	GAA	GAA
OTOA	881	1	T	P	T		P	P	P	P	P	P	P	P	P	P	P	P	P	P	P	P	P	P	P	P	P	P	2641	1	ACT	CCT	ACT		CCT	CCT	CCT	CCT	CCT	CCT	CCT	CCT	CCT	CCT	CCT	CCT	CCT	CCT	CCT
OTOA	902	1	Y	S	Y		S	S	S	S	S	S	S	S	S	S	S	S	S	S	S	S	S	S	S	S	S	S	2704	1	TAT	TCT	TAT		TCT	TCT	TCT	TCT	TCT	TCT	TCT	TCT	TCT	TCT	TCT	TCT	TCT	TCT	TCT
OTUD3	565	1	V	M	V	M	M	M	M	M	M	M	M	M	M	M	M	M	M	M	M	M	M	M	M	M	M	M	1693	1	GTG	ATG	GTG	ATG	ATG	ATG	ATG	ATG	ATG	ATG	ATG	ATG	ATG	ATG	ATG	ATG	ATG	ATG	ATG
PDZD8	600	2	A	-IMV	A	V	V	V	V		V	V	V	V	-	V	V	V	V	V	V	V	V	V	M	V	V	I	1798	2	GCG	---,ATA,ATG,GTG	GCG	GTG	GTG	GTG	GTG		GTG	GTG	GTG	GTG	---	GTG	GTG	GTG	GTG	GTG	GTG
PDZD8	630	2	V	-ALP	V	A	A	A	P		P	P	P	P	-	P	P	P	P	P	P	P	L	P	L	P	P	P	1888	2	GTG	---,CCA,CCG,CCT,CTG,GCG	GTG	GCG	GCG	GCG	CCA		CCG	CCG	CCG	CCG	---	CCG	CCG	CCG	CCG	CCG	CCG
PDZD8	648	2	A	-HP	A	P	P	P	P		P	P	P	P	-	P	P	P	P	P	P	P	P	P	H	H	H	H	1942	2	GCC	---,CAC,CCC	GCC	CCC	CCC	CCC	CCC		CCC	CCC	CCC	CCC	---	CCC	CCC	CCC	CCC	CCC	CCC
PHACTR2	423	2	A	-T	A	T	T	T	-	T	T	T	T	T	T	T	-	T	-	T	-	T	T	T	T	T	T	-	1267	2	GCA	---,ACA	GCA	ACA	ACA	ACA	---	ACA	ACA	ACA	ACA	ACA	ACA	ACA	---	ACA	---	ACA	---
PHACTR2	479	2	R	-K	R	K	K	K	K	K	K	K	K	K	K	K	K	K	K	K	-	K	K	K	K	K	K	K	1435	2	AGA	---,AAA	AGA	AAA	AAA	AAA	AAA	AAA	AAA	AAA	AAA	AAA	AAA	AAA	AAA	AAA	AAA	AAA	---
PHACTR2	482	2	D	-G	D	G	G	G	G	G	G	G	G	G	G	G	G	G	G	G	-	G	G	G	G	G	G	G	1444	2	GAC	---,GGC	GAC	GGC	GGC	GGC	GGC	GGC	GGC	GGC	GGC	GGC	GGC	GGC	GGC	GGC	GGC	GGC	---
PHACTR2	486	2	I	-AMT	I	M	M	M	M	T	T	T	T	T	T	T	T	T	T	T	-	T	A	T	T	T	T	A	1456	2	ATA	---,ACA,ACG,ATG,GCA	ATA	ATG	ATG	ATG	ATG	ACG	ACG	ACG	ACG	ACG	ACG	ACG	ACG	ACG	ACG	ACG	---
PHACTR2	507	2	A	-PS	A	S	S	S	S	S	S	S	S	S	S	S	S	S	S	S	-	S	S	S	S	P	S	S	1519	2	GCA	---,CCG,TCA,TCG	GCA	TCA	TCA	TCA	TCA	TCA	TCA	TCA	TCA	TCA	TCA	TCA	TCA	TCA	TCA	TCA	---
PHACTR2	531	2	F	-S	F	S	S	S	S	S	S	S	S	S	S	S	S	S	S	S	-	S	S	S	S	S	S	S	1591	2	TTC	---,TCC	TTC	TCC	TCC	TCC	TCC	TCC	TCC	TCC	TCC	TCC	TCC	TCC	TCC	TCC	TCC	TCC	---
PHACTR2	547	2	L	-P	L	P	P	P	P	P	P	P	P	P	P	P	P	P	P	P	-	P	P	P	P	P	P	P	1639	2	CTG	---,CCC,CCG	CTG	CCG	CCG	CCG	CCG	CCG	CCG	CCG	CCG	CCG	CCG	CCG	CCG	CCG	CCG	CCG	---
PLEKHO1	322	1	E	K	E	K	K	K	K	K	K	K	K	K	K	K	K	K	K	K	K	K	K	K	K	K	K	K	964	1	GAG	AAG	GAG	AAG	AAG	AAG	AAG	AAG	AAG	AAG	AAG	AAG	AAG	AAG	AAG	AAG	AAG	AAG	AAG
PNPLA7	130	2	R	-GNS	R	S	S	S	S	S	S	S	S	S	S	S	-	S	S	S	S	S	S	S	G	N	N		388	2	AGA	---,AAC,AGC,AGT,GGC	AGA	AGC	AGC	AGC	AGC	AGC	AGC	AGC	AGC	AGC	AGC	AGC	---	AGC	AGC	AGC	AGC
PNPLA7	583	2	Q	-E	Q	-	E	E	-	-	-	-	-	-	-	-	-	-	-	-	-	-	-	-	-	-	-		1747	2	CAG	---,GAG	CAG	---	GAG	GAG	---	---	---	---	---	---	---	---	---	---	---	---	---
PNPLA7	586	2	E	-D	E	-	D	D	-	-	-	-	-	-	-	-	-	-	-	-	-	-	-	-	-	-	-		1756	2	GAG	---,GAC	GAG	---	GAC	GAC	---	---	---	---	---	---	---	---	---	---	---	---	---
PNPLA7	802	2	Q	-CH	Q	H	H	H	H	H	H	H	H	H	-	H	-	H	H	H	H	H	H	H	C	H	H		2404	2	CAG	---,CAC,TGC	CAG	CAC	CAC	CAC	CAC	CAC	CAC	CAC	CAC	CAC	---	CAC	---	CAC	CAC	CAC	CAC
PNPLA7	1288	1	H	R	H	R	R	R	R	R	R	R	R	R	R	R	R	R	R	R	R	R	R	R	R	R	R		3862	2	CAT	CGC,CGT	CAT	CGT	CGT	CGT	CGT	CGT	CGC	CGC	CGC	CGC	CGC	CGC	CGT	CGC	CGC	CGC	CGC
PNPLA7	1414	2	L	-M	L	M	M	M	M	M	M	M	M	M	M	M	M	M	M	M	M	M	-	M	M	M	M		4240	2	TTG	---,ATG	TTG	ATG	ATG	ATG	ATG	ATG	ATG	ATG	ATG	ATG	ATG	ATG	ATG	ATG	ATG	ATG	ATG
PNPLA7	1476	2	W	-R	W	R	R	R	R	R	R	R	R	R	R	R	R	R	R	R	R	R	-	R	R	R	R		4426	2	TGG	---,CGC,CGG	TGG	CGG	CGG	CGG	CGG	CGG	CGG	CGG	CGG	CGG	CGG	CGG	CGG	CGG	CGG	CGG	CGG
PRKAR2B	121	2	Q	-H	Q	H	H	H	H	-	H	H	H	H	H	H	H	H	H	H	H	H	H	H	-	H	H	H	361	2	CAG	---,CAC	CAG	CAC	CAC	CAC	CAC	---	CAC	CAC	CAC	CAC	CAC	CAC	CAC	CAC	CAC	CAC	CAC
PTPRB	168	2	Q	-K	Q	K	K	K	-	K	K	K	K	K	K	K	K	K	K	K	K	K	K	K	K	K	K	-	502	2	CAA	---,AAA,AAG	CAA	AAA	AAA	AAA	---	AAA	AAG	AAG	AAG	AAG	AAG	AAG	AAA	AAA	AAA	AAA	AAA
PTPRB	484	2	F	-AS	F	S	S	S	S	S	S	S	S	S	S	-	S	S	S	S	S	S	S	S	S	S	S	A	1450	2	TTT	---,GCT,TCT	TTT	TCT	TCT	TCT	TCT	TCT	TCT	TCT	TCT	TCT	TCT	---	TCT	TCT	TCT	TCT	TCT
PTPRB	1432	1	L	Q	L	Q	Q	Q	Q	Q	Q	Q	Q	Q	Q	Q	Q	Q	Q	Q	Q	Q	Q	Q	Q	Q	Q	Q	4294	1	CTA	CAA	CTA	CAA	CAA	CAA	CAA	CAA	CAA	CAA	CAA	CAA	CAA	CAA	CAA	CAA	CAA	CAA	CAA
PTPRB	2149	2	G	ST	G	S	S	S	S	S	S	S	S	S	S	S	S	S	S	S	T	T	T	T	S	S	S	S	6445	2	GGT	ACT,AGC,AGT	GGT	AGT	AGT	AGT	AGT	AGT	AGT	AGT	AGT	AGT	AGT	AGT	AGT	AGT	AGT	AGT	ACT
REST	251	1	D	E	D	E	E	E	E	E	E	E	E	E	E	E	E	E	E	E	E	E	E	E	E	E			751	2	GAT	GAA,GAG	GAT	GAA	GAA	GAA	GAA	GAA	GAA	GAA	GAA	GAA	GAA	GAA	GAA	GAA	GAA	GAA	GAA
REST	285	1	D	E	D	E	E	E	E	E	E	E	E	E	E	E	E	E	E	E	E	E	E	E	E	E			853	2	GAT	GAA,GAG	GAT	GAG	GAG	GAG	GAG	GAG	GAG	GAG	GAG	GAG	GAG	GAG	GAG	GAG	GAG	GAG	GAG
REST	659	2	V	-MT	V	M	M	M	M	M	T	T	T	T	T	T	T	T	T	T	-	-	-	-	-	-			1975	2	GTG	---,ACA,ACG,ATG	GTG	ATG	ATG	ATG	ATG	ATG	ACG	ACG	ACG	ACG	ACG	ACG	ACG	ACA	ACG	ACG	---
REST	687	2	S	-AT	S	T	T	T	T	T	T	T	T	T	T	T	T	T	T	T	T	T	T	T	-	A			2059	2	AGC	---,ACC,GCC	AGC	ACC	ACC	ACC	ACC	ACC	ACC	ACC	ACC	ACC	ACC	ACC	ACC	ACC	ACC	ACC	ACC
REST	802	2	H	-P	H	P	P	P	P	P	P	P	P	P	P	P	P	P	P	P	P	P	P	P	-	-			2404	2	CAT	---,CCT	CAT	CCT	CCT	CCT	CCT	CCT	CCT	CCT	CCT	CCT	CCT	CCT	CCT	CCT	CCT	CCT	CCT
REST	814	2	P	-HQ	P	H	H	H	Q	H	H	H	H	H	H	H	H	H	H	H	H	H	H	H	-	-			2440	2	CCT	---,CAG,CAT	CCT	CAT	CAT	CAT	CAG	CAT	CAT	CAT	CAT	CAT	CAT	CAT	CAT	CAT	CAT	CAT	CAT
REST	846	2	I	-M	I	M	M	M	M	M	M	M	M	M	M	M	M	M	M	M	M	M	M	M	-	-			2536	2	ATT	---,ATG	ATT	ATG	ATG	ATG	ATG	ATG	ATG	ATG	ATG	ATG	ATG	ATG	ATG	ATG	ATG	ATG	ATG
REST	848	2	L	-P	L	P	P	P	P	P	P	P	P	P	P	P	P	P	P	P	P	P	P	P	-	-			2542	2	CTT	---,CCT	CTT	CCT	CCT	CCT	CCT	CCT	CCT	CCT	CCT	CCT	CCT	CCT	CCT	CCT	CCT	CCT	CCT
REST	951	2	K	-DHQ	K	Q	Q	Q	Q	Q	Q	Q	Q	Q	Q	Q	Q	Q	-	Q	-	H	D	D	-	Q			2851	2	AAG	---,CAC,CAG,GAC	AAG	CAG	CAG	CAG	CAG	CAG	CAG	CAG	CAG	CAG	CAG	CAG	CAG	CAG	---	CAG	---
REXO1	183	2	S	-P	S	P	-	-	P	P	P	-	P	-	-	P	P	P	-	-	P	-	P	P		P	P	P	547	2	TCC	---,CCA,CCC	TCC	CCC	---	---	CCC	CCC	CCC	---	CCC	---	---	CCC	CCC	CCC	---	---	CCC
REXO1	389	2	P	-L	P	L	L	L	L	L	L	-	L	L	L	L	L	L	L	-	L	L	L	L		L	L	L	1165	2	CCG	---,CTG,TTG	CCG	CTG	CTG	CTG	CTG	CTG	CTG	---	CTG	CTG	CTG	CTG	CTG	CTG	CTG	---	CTG
REXO1	1265	2	S	-P	S	P	P	P	P	P	P	-	P	P	P	P	P	P	P	P	P	P	P	P		P	P	P	3793	2	TCC	---,CCC,CCT	TCC	CCC	CCC	CCC	CCC	CCC	CCC	---	CCC	CCC	CCC	CCC	CCC	CCC	CCC	CCC	CCC
REXO1	1293	2	I	-T	I	T	T	T	T	T	T	-	T	T	T	T	T	T	T	T	T	T	T	T		T	T	T	3877	2	ATC	---,ACC	ATC	ACC	ACC	ACC	ACC	ACC	ACC	---	ACC	ACC	ACC	ACC	ACC	ACC	ACC	ACC	ACC
RIOK1	226	2	A	-T	A	T	T	T	T	T	T	T	T	T	T	T	T	T	T	T	T	T	T	T	-	T		T	676	2	GCC	---,ACC,ACT	GCC	ACC	ACC	ACC	ACC	ACC	ACT	ACT	ACT	ACT	ACT	ACT	ACT	ACT	ACT	ACT	ACC
RIOK1	575	2	R	-K	R	K	K	K	K	K	K	K	K	K	K	K	K	K	K	K	K	K	K	-	K	K		-	1723	2	AGG	---,AAG	AGG	AAG	AAG	AAG	AAG	AAG	AAG	AAG	AAG	AAG	AAG	AAG	AAG	AAG	AAG	AAG	AAG
RPAP1	320	2	R	EG	R	G	G	G	G	G	G	G	G	G	G	G	G	E	E	G	G	G	G	G	G	G	G	E	958	2	AGA	GAA,GGA	AGA	GGA	GGA	GGA	GGA	GGA	GGA	GGA	GGA	GGA	GGA	GGA	GGA	GAA	GAA	GGA	GGA
RPAP1	666	1	I	F	I	F	F	F	F	F	F	F	F	F	F	F	F	F	F	F	F	F	F	F	F	F	F	F	1996	1	ATC	TTC	ATC	TTC	TTC	TTC	TTC	TTC	TTC	TTC	TTC	TTC	TTC	TTC	TTC	TTC	TTC	TTC	TTC
RPAP1	840	1	Q	E	Q	E	E	E	E	E	E	E	E	E	E	E	E	E	E	E	E	E	E	E	E	E	E	E	2518	2	CAG	GAA,GAG	CAG	GAG	GAG	GAG	GAG	GAG	GAG	GAG	GAG	GAG	GAG	GAG	GAG	GAG	GAG	GAG	GAG
RPAP1	1215	1	R	P	R	P	P	P	P	P	P	P	P	P	P	P	P	P	P	P	P	P	P	P	P	P	P	P	3643	1	CGA	CCA	CGA	CCA	CCA	CCA	CCA	CCA	CCA	CCA	CCA	CCA	CCA	CCA	CCA	CCA	CCA	CCA	CCA
SACS	2323	1	V	A	V	A	A	A	A	A	A	A	A	A	A	A	A	A	A	A	A	A	A	A	A	A	A	A	6967	2	GTA	GCA,GCG	GTA	GCA	GCA	GCA	GCA	GCA	GCA	GCA	GCA	GCA	GCA	GCA	GCA	GCA	GCA	GCA	GCA
SACS	2490	1	V	I	V	I	I	I	I	I	I	I	I	I	I	I	I	I	I	I	I	I	I	I	I	I	I	I	7468	1	GTT	ATT	GTT	ATT	ATT	ATT	ATT	ATT	ATT	ATT	ATT	ATT	ATT	ATT	ATT	ATT	ATT	ATT	ATT
SACS	2613	2	R	-P	R	P	P	P	P	P	P	P	P	P	P	P	P	P	-	P	P	P	P	P	P	P	P	P	7837	2	CGC	---,CCC	CGC	CCC	CCC	CCC	CCC	CCC	CCC	CCC	CCC	CCC	CCC	CCC	CCC	CCC	---	CCC	CCC
SACS	2794	1	C	F	C	F	F	F	F	F	F	F	F	F	F	F	F	F	F	F	F	F	F	F	F	F	F	F	8380	2	TGC	TTC,TTT	TGC	TTC	TTC	TTC	TTC	TTC	TTC	TTC	TTC	TTC	TTC	TTC	TTC	TTC	TTC	TTC	TTC
SACS	4975	1	M	I	M	I	I	I	I	I	I	I	I	I	I	I	I	I	I	I	I	I	I	I	I	I	I	I	14923	1	ATG	ATA	ATG	ATA	ATA	ATA	ATA	ATA	ATA	ATA	ATA	ATA	ATA	ATA	ATA	ATA	ATA	ATA	ATA
SETD4	102	2	G	-R	G	R	R	R	R	R	R	R	-	R	-	R	R	R	R	R	R	R	R	-	R	R	R	R	304	2	GGA	---,AGA,AGG,CGG	GGA	AGA	AGA	AGA	AGA	AGA	AGA	AGA	---	AGA	---	AGA	AGA	AGA	AGA	AGA	AGG
SH3BP2	258	2	I	-ATVX	I	T	-	T	-	-	-	-	-	-	-	-	-	-	-	-	A	-	A	V	X	A	A	-	772	2	ATC	---,ACC,GCC,GTC,NNN	ATC	ACC	---	ACC	---	---	---	---	---	---	---	---	---	---	---	---	GCC
SMCR8	557	2	R	HQ	R	H	H	H		H	H	H	H	H		H	H	H	H	H	H	H	H	H	Q	H	H	H	1669	2	CGC	CAC,CAG	CGC	CAC	CAC	CAC		CAC	CAC	CAC	CAC	CAC		CAC	CAC	CAC	CAC	CAC	CAC
SMPD3	264	2	V	AT	V	A	A	A	A	A	A	A	A	A	A	A	A	A	A	A	A	A	A	A	A	A	A	T	790	2	GTG	ACC,GCC,GCG	GTG	GCG	GCG	GCG	GCG	GCG	GCG	GCG	GCG	GCG	GCG	GCG	GCG	GCG	GCG	GCG	GCC
SPAG16	273	2	G	AV	G	A	A	A	A	A	A	A	A	A	A	A	A		A	A	V	V	V	V	V	V	V		817	2	GGT	GCT,GTT	GGT	GCT	GCT	GCT	GCT	GCT	GCT	GCT	GCT	GCT	GCT	GCT	GCT		GCT	GCT	GTT
SPAG16	361	2	Q	-H	Q	H	H	H	-	H	H	H	H	H	H	H	-		-	H	H	H	H	H	-	H	-		1081	2	CAA	---,CAC	CAA	CAC	CAC	CAC	---	CAC	CAC	CAC	CAC	CAC	CAC	CAC	---		---	CAC	CAC
SPART	448	1	I	F	I	F	F	F	F	F	F	F	F	F	F	F	F	F	F	F	F	F	F	F	F	F	F	F	1342	2	ATT	TTC,TTT	ATT	TTT	TTT	TTT	TTT	TTT	TTT	TTT	TTT	TTT	TTT	TTT	TTT	TTT	TTT	TTT	TTT
SPG11	133	2	L	-IMV	L	I	I	I	I	I	I	I	I	I	I	I	-	I	I	I	M	I	V	I	V	V	V	M	397	2	CTA	---,ATA,ATG,GTA,GTG	CTA	ATA	ATA	ATA	ATA	ATA	ATA	ATA	ATA	ATA	ATA	ATA	---	ATA	ATA	ATA	ATG
SPG11	337	2	A	-LV	A	V	V	V	V	V	V	V	V	V	V	V	-	V	V	V	V	V	L	V	V	V	V	V	1009	2	GCA	---,GTA,GTG,TTA	GCA	GTA	GTA	GTA	GTA	GTA	GTA	GTA	GTA	GTA	GTA	GTA	---	GTA	GTA	GTA	GTA
SPG11	379	2	V	-IM	V	I	I	I	I	I	I	I	I	I	I	I	-	I	I	I	I	I	M	I	I	I	I	I	1135	2	GTA	---,ATA,ATG	GTA	ATA	ATA	ATA	ATA	ATA	ATA	ATA	ATA	ATA	ATA	ATA	---	ATA	ATA	ATA	ATA
SPG11	394	2	A	-T	A	T	T	T	T	T	T	T	T	T	T	T	-	T	T	T	T	T	T	T	T	T	T	T	1180	2	GCC	---,ACC,ACT	GCC	ACC	ACC	ACC	ACC	ACC	ACC	ACC	ACC	ACC	ACC	ACC	---	ACC	ACC	ACC	ACC
SPG11	1268	2	I	-L	I	L	L	L	L	L	L	L	L	L	L	L	-	L	L	L	L	L	L	L	L	L	-	L	3802	2	ATC	---,CTC	ATC	CTC	CTC	CTC	CTC	CTC	CTC	CTC	CTC	CTC	CTC	CTC	---	CTC	CTC	CTC	CTC
SPG11	1644	2	N	-GRST	N	S	S	S	S	S	T	S	S	S	S	-	-	S	S	R	G	S	S	S	G	S	S	S	4930	2	AAT	---,ACT,AGT,CGT,GGT	AAT	AGT	AGT	AGT	AGT	AGT	ACT	AGT	AGT	AGT	AGT	---	---	AGT	AGT	CGT	GGT
SPG11	1843	2	I	-ALV	I	V	V	V	V	V	V	V	V	V	V	V	-	V	V	V	V	V	V	V	A	L	L	L	5527	2	ATC	---,CTC,CTT,GCC,GTC,GTT	ATC	GTC	GTC	GTC	GTC	GTC	GTC	GTC	GTC	GTC	GTC	GTC	---	GTC	GTC	GTC	GTC
SPG11	2171	2	N	-D	N	D	D	D	D	D	D	-	D	D	D	D	-	D	D	D	D	D	D	D	D	D	D	D	6511	2	AAT	---,GAT	AAT	GAT	GAT	GAT	GAT	GAT	GAT	---	GAT	GAT	GAT	GAT	---	GAT	GAT	GAT	GAT
SPG11	2354	2	H	-QR	H	Q	Q	Q	Q	Q	R	R	R	R	R	R	-	R	R	R	R	R	R	R	R	R	R	R	7060	2	CAC	---,CAG,CGG	CAC	CAG	CAG	CAG	CAG	CAG	CGG	CGG	CGG	CGG	CGG	CGG	---	CGG	CGG	CGG	CGG
SYCP2L	9	2	A	-PS	A	P	-	P	P	P	P	P	P	P	P	P	P	P	P	P	P	P	P	P	P	S		P	25	2	GCT	---,CCT,TCT	GCT	CCT	---	CCT	CCT	CCT	CCT	CCT	CCT	CCT	CCT	CCT	CCT	CCT	CCT	CCT	CCT
SYCP2L	96	2	V	-IR	V	I	-	I	I	I	I	I	I	I	I	I	I	I	I	I	I	I	R	I	I	I		I	286	2	GTA	---,AGA,ATA	GTA	ATA	---	ATA	ATA	ATA	ATA	ATA	ATA	ATA	ATA	ATA	ATA	ATA	ATA	ATA	ATA
SYCP2L	854	2	F	-L	F	L	L	L	L	L	L	L	L	L	L	L	-	L	L	L	L	L	L	L	-	L		L	2560	2	TTT	---,CTG,CTT	TTT	CTT	CTT	CTT	CTG	CTT	CTT	CTT	CTT	CTT	CTT	CTT	---	CTT	CTT	CTT	CTT
SYNJ2	79	2	D	-GSX	D	G	G	G	G	G	G	G	G	G	-	G	G	S	S	-	G	G	G	G	X	-	G	-	235	2	GAC	---,AGC,GGC,NNN	GAC	GGC	GGC	GGC	GGC	GGC	GGC	GGC	GGC	GGC	---	GGC	GGC	AGC	AGC	---	GGC
SYNJ2	1102	1	S	N	S	N	N	N	N	N	N	N	N	N	N	N	N	N	N	N	N	N	N	N	N	N	N	N	3304	2	AGT	AAC,AAT	AGT	AAT	AAT	AAT	AAT	AAT	AAT	AAT	AAT	AAT	AAT	AAT	AAT	AAT	AAT	AAT	AAT
SYNJ2	1311	1	Q	H	Q	H	H	H	H	H	H	H	H	H	H	H	H	H	H	H	H	H	H	H	H	H	H	H	3931	1	CAA	CAC	CAA	CAC	CAC	CAC	CAC	CAC	CAC	CAC	CAC	CAC	CAC	CAC	CAC	CAC	CAC	CAC	CAC
SYNJ2	1747	2	E	-D	E	D	D	D	D	D	D	D	D	D	-	D	D	D	D	D	D	D	D	D	D	D	D	-	5239	2	GAA	---,GAC	GAA	GAC	GAC	GAC	GAC	GAC	GAC	GAC	GAC	GAC	---	GAC	GAC	GAC	GAC	GAC	GAC
TANC1	182	2	H	-PS	H	P	P	P	P	P	P	P	P	P	P	P	P	P	P	P	P	S	P	P	P	P	P	-	544	2	CAC	---,CCC,TCC	CAC	CCC	CCC	CCC	CCC	CCC	CCC	CCC	CCC	CCC	CCC	CCC	CCC	CCC	CCC	CCC	CCC
TANC1	196	2	T	-AV	T	A	A	A	A	A	A	A	A	A	A	A	A	A	A	A	A	A	A	A	V	A	V	-	586	2	ACA	---,GCA,GTA	ACA	GCA	GCA	GCA	GCA	GCA	GCA	GCA	GCA	GCA	GCA	GCA	GCA	GCA	GCA	GCA	GCA
TANC1	262	2	A	PS	A	S	S	S	S	P	S	S	S	S	S	S	S	S	S	S	S	S	S	S	S	S	S	S	784	2	GCC	CCC,TCC	GCC	TCC	TCC	TCC	TCC	CCC	TCC	TCC	TCC	TCC	TCC	TCC	TCC	TCC	TCC	TCC	TCC
TANC1	400	1	N	S	N	S	S	S	S	S	S	S	S	S	S	S	S	S	S	S	S	S	S	S	S	S	S	S	1198	1	AAC	AGC	AAC	AGC	AGC	AGC	AGC	AGC	AGC	AGC	AGC	AGC	AGC	AGC	AGC	AGC	AGC	AGC	AGC
TANC1	1147	2	V	-A	V	A	A	A	A	A	A	A	-	A	A	A	A	A	A	A	A	A	A	A	A	A	A	A	3439	2	GTG	---,GCA,GCC,GCG	GTG	GCG	GCG	GCG	GCG	GCG	GCG	GCG	---	GCG	GCG	GCG	GCG	GCA	GCA	GCG	GCG
TANC1	1587	1	V	I	V	I	I	I	I	I	I	I	I	I	I	I	I	I	I	I	I	I	I	I	I	I	I	I	4759	2	GTC	ATC,ATT	GTC	ATC	ATC	ATC	ATC	ATC	ATC	ATC	ATC	ATC	ATC	ATC	ATC	ATC	ATC	ATC	ATC
TANC1	1617	2	L	AP	L	P	P	P	P	P	P	P	P	P	P	P	P	P	P	P	P	P	P	P	P	P	P	A	4849	2	CTC	CCC,GCC	CTC	CCC	CCC	CCC	CCC	CCC	CCC	CCC	CCC	CCC	CCC	CCC	CCC	CCC	CCC	CCC	CCC
TANC1	1926	2	S	AT	S	T	T	T	T	T	A	A	A	A	A	A	A	A	A	A	A	A	T	T	T	A	T	T	5776	2	AGC	ACC,ACG,GCA,GCC	AGC	ACC	ACC	ACC	ACC	ACC	GCC	GCC	GCC	GCC	GCC	GCC	GCC	GCC	GCC	GCC	GCA
TCOF1	620	2	R	-G	R	G	G	G	G	G	G	G	G	G	G	G	G	G	G	G	G	G	G	G	-	-	-	-	1858	2	AGA	---,GGA,GGG	AGA	GGA	GGA	GGA	GGA	GGA	GGG	GGG	GGG	GGG	GGG	GGG	GGG	GGG	GGG	GGG	GGG
TCOF1	1348	2	H	LPS	H	P	P	P	P	P	P	P	P	P	P	P	P	P	P	P	P	P	P	P	S	L	L	P	4042	2	CAC	CCC,CCT,CTC,TCC	CAC	CCC	CCC	CCC	CCC	CCC	CCC	CCC	CCC	CCC	CCC	CCC	CCC	CCT	CCT	CCC	CCC
TCOF1	1981	2	G	AT	G	A	A	A	A	A	A	A	A	A	A	A	A	A	A	A	A	A	A	A	T	A	A	A	5941	2	GGT	ACT,GCT	GGT	GCT	GCT	GCT	GCT	GCT	GCT	GCT	GCT	GCT	GCT	GCT	GCT	GCT	GCT	GCT	GCT
TCOF1	2253	1	T	K	T	K	K	K	K	K	K	K	K	K	K	K	K	K	K	K	K	K	K	K	K	K	K	K	6757	1	ACG	AAG	ACG	AAG	AAG	AAG	AAG	AAG	AAG	AAG	AAG	AAG	AAG	AAG	AAG	AAG	AAG	AAG	AAG
TCTE3	55	1	N	D	N	D	D	D	D	D	D	D	D	D	D	D	D	D	D	D	D	D	D	D	D	D	D	D	163	2	AAT	GAC,GAT	AAT	GAT	GAT	GAT	GAT	GAT	GAT	GAT	GAT	GAT	GAT	GAT	GAT	GAT	GAT	GAT	GAT
TDRD9	322	2	S	HN	S	N	N	N	N	N	N	N	N	N	N	N	N	N	N	N	N	N	H	N	N	N	N	N	964	2	AGC	AAC,CAC	AGC	AAC	AAC	AAC	AAC	AAC	AAC	AAC	AAC	AAC	AAC	AAC	AAC	AAC	AAC	AAC	AAC
TDRD9	961	1	N	K	N	K	K	K	K	K	K	K	K	K	K	K	K	K	K	K	K	K	K	K	K	K	K	K	2881	1	AAC	AAA	AAC	AAA	AAA	AAA	AAA	AAA	AAA	AAA	AAA	AAA	AAA	AAA	AAA	AAA	AAA	AAA	AAA
TDRD9	1194	2	T	-S	T	S	S	S	-	S	S	S	S	S	S	S	S	S	S	S	S	S	S	S	S	S	S	S	3580	2	ACC	---,TCC,TCT	ACC	TCC	TCC	TCC	---	TCC	TCC	TCC	TCC	TCC	TCC	TCC	TCC	TCC	TCC	TCT	TCC
TICRR	200	2	R	-Q	R	Q	Q	Q	Q	Q	Q	Q	-	Q	-	Q	Q	Q	Q	Q	Q	Q	Q	Q	-	Q	Q	Q	598	2	CGG	---,CAG	CGG	CAG	CAG	CAG	CAG	CAG	CAG	CAG	---	CAG	---	CAG	CAG	CAG	CAG	CAG	CAG
TICRR	472	2	R	-LW	R	W	W	W	-	W	W	W	W	W	L	W	W	W	W	W	W	W	W	W	-	W	W	W	1414	2	CGG	---,CTG,TGG	CGG	TGG	TGG	TGG	---	TGG	TGG	TGG	TGG	TGG	CTG	TGG	TGG	TGG	TGG	TGG	TGG
TICRR	516	2	C	-F	C	F	F	F	-	F	F	F	F	F	-	F	F	F	F	F	F	F	F	F	-	F	F	F	1546	2	TGC	---,TTC,TTT	TGC	TTC	TTC	TTC	---	TTC	TTC	TTC	TTC	TTC	---	TTC	TTC	TTC	TTC	TTC	TTT
TICRR	1624	2	Q	-GRW	Q	R	R	R	W	W	W	W	W	W	W	W	W	W	W	W	G	G	G	G	-	W	W	G	4870	2	CAG	---,CGG,GGG,TGG	CAG	CGG	CGG	CGG	TGG	TGG	TGG	TGG	TGG	TGG	TGG	TGG	TGG	TGG	TGG	TGG	GGG
TICRR	1647	2	E	-KQRT	E	K	K	K	K	K	K	K	K	K	K	K	K	K	K	K	R	T	R	R	-	T	T	Q	4939	2	GAA	---,AAA,ACA,AGA,CAG	GAA	AAA	AAA	AAA	AAA	AAA	AAA	AAA	AAA	AAA	AAA	AAA	AAA	AAA	AAA	AAA	AGA
TICRR	1761	2	D	-N	D	N	N	N	N	N	N	N	N	N	N	N	N	N	N	N	N	N	N	N	-	N	N	N	5281	2	GAC	---,AAC	GAC	AAC	AAC	AAC	AAC	AAC	AAC	AAC	AAC	AAC	AAC	AAC	AAC	AAC	AAC	AAC	AAC
TICRR	1808	2	R	-CDY	R	C	C	C	C	C	C	C	C	C	C	C	C	C	C	C	C	C	C	C	-	D	Y	Y	5422	2	CGT	---,GAT,TAC,TAT,TGC,TGT	CGT	TGT	TGT	TGT	TGT	TGT	TGT	TGT	TGT	TGT	TGT	TGT	TGT	TGT	TGT	TGT	TGC
TICRR	2113	2	E	-DN	E	D	D	D	D	D	D	D	D	D	D	D	D	D	D	D	D	D	D	D	-	D	D	N	6337	2	GAA	---,AAT,GAC,GAT	GAA	GAT	GAT	GAT	GAT	GAT	GAT	GAT	GAT	GAT	GAT	GAT	GAT	GAT	GAT	GAT	GAC
TNFRSF1A	296	2	N	-TV	N	T	T	T	T	T	T	T	T	T	T	T	T	T	T	T	T	T	T	T	-	T	-	V	886	2	AAC	---,ACC,GTT	AAC	ACC	ACC	ACC	ACC	ACC	ACC	ACC	ACC	ACC	ACC	ACC	ACC	ACC	ACC	ACC	ACC
TNS3	454	1	L	P	L	P	P	P	P	P	P	P	P	P	P	P	P	P	P	P	P	P	P	P	P	P	P	P	1360	1	CTC	CCC	CTC	CCC	CCC	CCC	CCC	CCC	CCC	CCC	CCC	CCC	CCC	CCC	CCC	CCC	CCC	CCC	CCC
TNS3	1354	2	M	-AT	M	T	T	T	T	-	T	T	T	T	T	T	T	T	T	T	A	A	A	A	T	T	T	T	4060	2	ATG	---,ACA,ACC,ACG,ACT,GCA,GCG	ATG	ACG	ACG	ACG	ACG	---	ACA	ACG	ACG	ACG	ACG	ACG	ACG	ACG	ACG	ACG	GCA
TP53I3	466	2	K	-E	K	E	E	E	E	E	E	-	E	E	E	E	E	E	E	E	E	E	E	E	E	E	-	E	1396	2	AAA	---,GAA	AAA	GAA	GAA	GAA	GAA	GAA	GAA	---	GAA	GAA	GAA	GAA	GAA	GAA	GAA	GAA	GAA
TPCN2	841	2	V	-ALQ	V	L	L	L	L	L	L	L	L	L	L	L	L	L	L	L	L	L	L	L	-	A	Q	Q	2521	2	GTG	---,CAG,CTG,GCT	GTG	CTG	CTG	CTG	CTG	CTG	CTG	CTG	CTG	CTG	CTG	CTG	CTG	CTG	CTG	CTG	CTG
TPCN2	880	2	L	-P	L	P	P	P	P	P	P	P	P	P	P	P	P	P	P	P	P	P	P	P	-	P	P	P	2638	2	CTG	---,CCC,CCG,CCT	CTG	CCG	CCG	CCG	CCC	CCT	CCG	CCG	CCG	CCG	CCG	CCG	CCG	CCG	CCG	CCG	CCG
TPCN2	924	2	L	-PS	L	S	S	P	P	P	P	P	P	P	P	P	P	P	P	P	P	P	P	P	-	P	P	P	2770	2	CTT	---,CCC,CCT,TCT	CTT	TCT	TCT	CCT	CCT	CCT	CCC	CCC	CCC	CCC	CCC	CCC	CCC	CCC	CCC	CCC	CCT
TRAFD1	605	1	T	I	T	I	I	I	I	I	I	I	I	I	I	I	I	I	I	I	I	I	I	I	I	I	I	I	1813	2	ACT	ATC,ATT	ACT	ATT	ATT	ATT	ATT	ATT	ATT	ATT	ATT	ATT	ATT	ATT	ATT	ATT	ATT	ATT	ATT
TRAFD1	648	1	S	P	S	P	P	P	P	P	P	P	P	P	P	P	P	P	P	P	P	P	P	P	P	P	P	P	1942	1	TCT	CCT	TCT	CCT	CCT	CCT	CCT	CCT	CCT	CCT	CCT	CCT	CCT	CCT	CCT	CCT	CCT	CCT	CCT
TRAFD1	669	1	D	N	D	N	N	N	N	N	N	N	N	N	N	N	N	N	N	N	N	N	N	N	N	N	N	N	2005	1	GAC	AAC	GAC	AAC	AAC	AAC	AAC	AAC	AAC	AAC	AAC	AAC	AAC	AAC	AAC	AAC	AAC	AAC	AAC
TRAFD1	703	2	S	AT	S	A	A	A	A	T	A	A	A	A	A	A	A	A	A	A	A	A	A	A	A	A	A	A	2107	2	TCA	ACA,GCA	TCA	GCA	GCA	GCA	GCA	ACA	GCA	GCA	GCA	GCA	GCA	GCA	GCA	GCA	GCA	GCA	GCA
TREM2	108	2	W	QR	W	R	R	R	R	R	R	R	R	R	R	R	R	R	R	R	R	R	Q	R	R	R	R	R	322	2	TGG	CAG,CGA,CGG	TGG	CGG	CGG	CGG	CGG	CGG	CGG	CGG	CGG	CGG	CGG	CGG	CGG	CGG	CGG	CGG	CGG
TTC37	721	1	K	T	K	T	T	T	T	T	T	T	T	T	T	T	T	T	T	T	T	T	T	T	T	T	T		2161	1	AAA	ACA	AAA	ACA	ACA	ACA	ACA	ACA	ACA	ACA	ACA	ACA	ACA	ACA	ACA	ACA	ACA	ACA	ACA
TTC37	796	1	A	S	A	S	S	S	S	S	S	S	S	S	S	S	S	S	S	S	S	S	S	S	S	S	S		2386	1	GCA	TCA	GCA	TCA	TCA	TCA	TCA	TCA	TCA	TCA	TCA	TCA	TCA	TCA	TCA	TCA	TCA	TCA	TCA
TTC37	1140	2	T	-I	T	I	I	-	-	-	-	-	-	-	-	-	-	-	-	-	-	-	-	-	-	-	-		3418	2	ACT	---,ATT	ACT	ATT	ATT	---	---	---	---	---	---	---	---	---	---	---	---	---	---
TTC37	1157	2	V	-E	V	E	E	-	-	-	-	-	-	-	-	-	-	-	-	-	-	-	-	-	-	-	-		3469	2	GTG	---,GAG	GTG	GAG	GAG	---	---	---	---	---	---	---	---	---	---	---	---	---	---
TTC37	1320	2	T	-LM	T	M	M	M	M	-	M	M	M	M	M	M	M	M	M	M	M	L	M	M	M	M	M		3958	2	ACG	---,ATG,TTG	ACG	ATG	ATG	ATG	ATG	---	ATG	ATG	ATG	ATG	ATG	ATG	ATG	ATG	ATG	ATG	ATG
TTC37	1398	2	I	ATV	I	V	V	V	V	V	V	V	V	V	V	V	V	V	V	V	A	A	A	A	T	T	T		4192	2	ATA	ACA,ACC,GCA,GTA,GTT	ATA	GTT	GTA	GTA	GTA	GTA	GTA	GTA	GTA	GTA	GTA	GTA	GTA	GTA	GTA	GTA	GCA
TTC37	1530	1	E	K	E	K	K	K	K	K	K	K	K	K	K	K	K	K	K	K	K	K	K	K	K	K	K		4588	1	GAA	AAA	GAA	AAA	AAA	AAA	AAA	AAA	AAA	AAA	AAA	AAA	AAA	AAA	AAA	AAA	AAA	AAA	AAA
TTC37	1645	1	L	V	L	V	V	V	V	V	V	V	V	V	V	V	V	V	V	V	V	V	V	V	V	V	V		4933	2	TTG	GTA,GTG	TTG	GTG	GTG	GTG	GTG	GTG	GTG	GTG	GTG	GTG	GTG	GTG	GTG	GTG	GTG	GTG	GTG
TTC37	1649	1	R	Q	R	Q	Q	Q	Q	Q	Q	Q	Q	Q	Q	Q	Q	Q	Q	Q	Q	Q	Q	Q	Q	Q	Q		4945	1	CGG	CAG	CGG	CAG	CAG	CAG	CAG	CAG	CAG	CAG	CAG	CAG	CAG	CAG	CAG	CAG	CAG	CAG	CAG
URB2	328	1	G	E	G	E	E	E	E	E	E	E	E	E	E	E	E	E	E	E	E	E	E	E	E	E	E	E	982	2	GGG	GAA,GAG	GGG	GAG	GAG	GAG	GAA	GAG	GAG	GAG	GAG	GAG	GAG	GAG	GAG	GAG	GAG	GAG	GAG
URB2	354	2	N	AST	N	T	T	T	T	T	T	T	T	T	T	T	T	T	T	T	T	T	T	T	T	S	S	A	1060	2	AAC	ACC,ACT,AGC,GCC	AAC	ACC	ACC	ACC	ACC	ACC	ACT	ACC	ACC	ACC	ACC	ACC	ACC	ACC	ACC	ACC	ACC
URB2	525	2	R	HQ	R	H	H	H	H	H	H	H	H	H	H	H	H	Q	Q	H	H	H	H	H	H	H	H	H	1573	2	CGT	CAC,CAG,CAT	CGT	CAT	CAT	CAT	CAT	CAT	CAT	CAT	CAT	CAT	CAT	CAT	CAT	CAG	CAG	CAT	CAT
URB2	615	2	L	ST	L	S	S	S	S	S	S	S	S	S	S	S	S	S	S	S	S	S	S	S	S	S	T	S	1843	2	TTG	ACA,TCA,TCG	TTG	TCG	TCG	TCA	TCG	TCG	TCG	TCG	TCG	TCG	TCG	TCG	TCG	TCA	TCA	TCA	TCG
URB2	647	1	M	L	M	L	L	L	L	L	L	L	L	L	L	L	L	L	L	L	L	L	L	L	L	L	L	L	1939	2	ATG	CTA,CTG	ATG	CTG	CTG	CTG	CTG	CTG	CTG	CTG	CTG	CTG	CTG	CTG	CTG	CTG	CTG	CTG	CTG
URB2	659	1	P	L	P	L	L	L	L	L	L	L	L	L	L	L	L	L	L	L	L	L	L	L	L	L	L	L	1975	2	CCG	CTA,CTG	CCG	CTG	CTG	CTG	CTG	CTG	CTG	CTG	CTG	CTG	CTG	CTG	CTG	CTG	CTG	CTG	CTA
URB2	849	2	V	AG	V	G	G	G	G	G	G	G	G	G	G	G	G	G	G	A	G	G	G	G	G	G	G	G	2545	2	GTC	GCC,GGC	GTC	GGC	GGC	GGC	GGC	GGC	GGC	GGC	GGC	GGC	GGC	GGC	GGC	GGC	GGC	GCC	GGC
URB2	991	2	V	LM	V	L	L	L	L	L	L	L	L	L	L	L	L	L	L	L	L	L	L	L	L	L	M	L	2971	2	GTG	ATG,CTG	GTG	CTG	CTG	CTG	CTG	CTG	CTG	CTG	CTG	CTG	CTG	CTG	CTG	CTG	CTG	CTG	CTG
URB2	1223	2	V	AT	V	A	A	A	A	A	A	A	A	A	A	A	A	A	A	A	A	A	A	A	A	T	A	A	3667	2	GTT	ACT,GCG,GCT	GTT	GCT	GCT	GCT	GCT	GCT	GCT	GCT	GCT	GCT	GCT	GCT	GCT	GCT	GCT	GCT	GCT
URB2	1381	2	S	-C	S	C	C	C	C	C	C	C	C	C	C	C	C	C	C	-	C	C	C	C	C	C	C	C	4141	2	TCT	---,TGT	TCT	TGT	TGT	TGT	TGT	TGT	TGT	TGT	TGT	TGT	TGT	TGT	TGT	TGT	TGT	---	TGT
USP4	26	2	P	-A	P	A	A	A	-	A	A	A	A	A	A	A	-	A	A	A	-	-	A	A	A	A	A	A	76	2	CCC	---,GCC	CCC	GCC	GCC	GCC	---	GCC	GCC	GCC	GCC	GCC	GCC	GCC	---	GCC	GCC	GCC	---
USP4	1181	2	F	LM	F	L	L	L	L	L	M	M	L	M	M	M	M	M	M	M	L	L	L	L	L	L	L	L	3541	2	TTT	ATG,TTA,TTG	TTT	TTG	TTG	TTG	TTG	TTG	ATG	ATG	TTG	ATG	ATG	ATG	ATG	ATG	ATG	ATG	TTG
WDR77	379	1	V	I	V	I	I	I	I	I	I	I	I	I	I	I	I	I	I	I	I		I	I	I	I	I	I	1135	2	GTT	ATC,ATT	GTT	ATT	ATT	ATT	ATT	ATT	ATC	ATC	ATC	ATC	ATC	ATC	ATC	ATT	ATT	ATT	ATT
WDR78	22	2	G	-A	G	A	A	-	A	A	A	A	A	A	A	A	A	A	A	A	A	A	-	A	-	-	A	-	64	2	GGA	---,GCA,GCC	GGA	GCA	GCA	---	GCA	GCA	GCA	GCA	GCA	GCA	GCA	GCA	GCA	GCA	GCA	GCA	GCC
WDR78	40	1	Q	-	Q	-	-	-	-	-	-	-	-	-	-	-	-	-	-	-	-	-	-	-	-	-	-	-	118	1	CAA	---	CAA	---	---	---	---	---	---	---	---	---	---	---	---	---	---	---	---
WDR78	45	2	C	-RW	C	W	W	-	W	W	W	W	R	W	W	W	W	-	W	W	W	R	-	W	-	-	W	-	133	2	TGC	---,AGG,CGG,TGG	TGC	TGG	TGG	---	TGG	TGG	TGG	TGG	AGG	TGG	TGG	TGG	TGG	---	TGG	TGG	TGG
WDR78	119	2	P	-IMT	P	T	T	-	T	T	T	T	T	T	T	T	T	T	T	T	T	T	T	T	I	-	M	-	355	2	CCA	---,ACA,ATG,ATT	CCA	ACA	ACA	---	ACA	ACA	ACA	ACA	ACA	ACA	ACA	ACA	ACA	ACA	ACA	ACA	ACA
WDR78	714	2	G	-D	G	D	D	D	D	D	D	D	D	D	D	D	D	D	D	D	D	D	D	D	D	-	-	D	2140	2	GGC	---,GAC,GAT	GGC	GAC	GAC	GAC	GAC	GAC	GAC	GAC	GAC	GAC	GAC	GAC	GAT	GAC	GAC	GAC	GAC
WDR78	897	2	A	-T	A	T	T	T	T	T	T	T	T	T	T	T	T	T	T	T	T	T	T	T	T	T	-	T	2689	2	GCT	---,ACT	GCT	ACT	ACT	ACT	ACT	ACT	ACT	ACT	ACT	ACT	ACT	ACT	ACT	ACT	ACT	ACT	ACT
XPC	264	1	G	E	G	E	E	E	E	E	E	E	E	E	E	E	E	E	E	E	E	E	E	E	E		E	E	790	2	GGG	GAA,GAG	GGG	GAG	GAG	GAG	GAG	GAG	GAG	GAG	GAG	GAG	GAG	GAG	GAG	GAG	GAG	GAG	GAG
XPC	504	2	R	KNT	R	K	K	K	K	K	K	K	K	K	K	K	K	K	K	K	K	K	K	K	N		N	T	1510	2	AGG	AAC,AAG,AAT,ACT	AGG	AAG	AAG	AAG	AAG	AAG	AAG	AAG	AAG	AAG	AAG	AAG	AAG	AAG	AAG	AAG	AAG
XPC	615	2	H	-Q	H	Q	Q	Q	Q	Q	Q	Q	Q	Q	Q	Q	Q	Q	Q	Q	Q	Q	Q	Q	Q		-	Q	1843	2	CAT	---,CAA,CAG	CAT	CAA	CAA	CAA	CAA	CAA	CAA	CAA	CAA	CAA	CAA	CAA	CAA	CAA	CAA	CAA	CAA
XPC	1131	2	Q	-K	Q	K	-	K	K	K	K	K	K	K	K	K	-	K	K	K	K	K	K	K	K		K	K	3391	2	CAG	---,AAG	CAG	AAG	---	AAG	AAG	AAG	AAG	AAG	AAG	AAG	AAG	AAG	---	AAG	AAG	AAG	AAG
ZBTB49	321	2	Y	-S	Y	S	S	S	S	S	S	S	S	S	S	S	S	S	S	S	-	S	S	S	S	S	S	S	961	2	TAC	---,TCA,TCC,TCG,TCT	TAC	TCT	TCC	TCC	TCC	TCT	TCC	TCC	TCC	TCC	TCC	TCC	TCC	TCC	TCC	TCC	---
ZC3H6	487	2	T	-N	T	N	N	N	-	N	N	N	N	N	N	N	N	N	N	N	-	N	N	N	N	N	N	N	1459	2	ACC	---,AAC	ACC	AAC	AAC	AAC	---	AAC	AAC	AAC	AAC	AAC	AAC	AAC	AAC	AAC	AAC	AAC	---
ZC3H6	1026	2	A	-T	A	T	T	T	-	T	T	T	T	T	T	T	T	T	T	T	-	T	T	T	T	T	T	T	3076	2	GCA	---,ACA	GCA	ACA	ACA	ACA	---	ACA	ACA	ACA	ACA	ACA	ACA	ACA	ACA	ACA	ACA	ACA	---
ZC3H6	1034	2	P	-AS	P	S	S	S	-	A	A	A	A	A	A	A	A	A	A	A	-	A	A	A	A	A	A	A	3100	2	CCC	---,GCC,TCC	CCC	TCC	TCC	TCC	---	GCC	GCC	GCC	GCC	GCC	GCC	GCC	GCC	GCC	GCC	GCC	---
ZC3H6	1121	2	T	-NS	T	N	N	N	-	N	N	N	N	N	N	N	N	S	S	N	-	N	N	N	N	N	N	N	3361	2	ACT	---,AAC,AAT,AGT	ACT	AAT	AAT	AAT	---	AAT	AAT	AAT	AAT	AAT	AAT	AAT	AAT	AGT	AGT	AAT	---
ZC3H6	1134	2	P	-AT	P	T	A	T	-	T	T	T	T	T	T	T	T	T	T	T	-	T	T	T	T	T	T	T	3400	2	CCC	---,ACA,ACC,GCC	CCC	ACC	GCC	ACC	---	ACC	ACC	ACC	ACC	ACC	ACC	ACC	ACC	ACC	ACC	ACC	---
ZC3H6	1139	2	G	-E	G	E	E	E	-	E	E	E	E	E	E	E	E	E	E	E	-	E	E	E	E	E	E	E	3415	2	GGA	---,GAA,GAG	GGA	GAA	GAA	GAA	---	GAA	GAA	GAA	GAA	GAA	GAA	GAA	GAA	GAA	GAA	GAA	---
ZC3H6	1143	2	E	-AD	E	D	D	D	-	D	D	D	D	D	D	D	D	D	D	D	-	D	A	D	D	D	D	D	3427	2	GAG	---,GAC,GAT,GCC	GAG	GAC	GAC	GAT	---	GAT	GAC	GAT	GAT	GAT	GAT	GAT	GAT	GAT	GAT	GAT	---
ZDHHC1	141	1	N	D	N	D	D	D	D	D	D	D	D	D	D	D	D	D	D	D	D	D	D	D	D	D	D	D	421	2	AAC	GAC,GAT	AAC	GAC	GAC	GAC	GAC	GAC	GAC	GAC	GAC	GAC	GAC	GAC	GAC	GAC	GAC	GAC	GAC
[truncated: 7 more columns]
