# Supplementary material for: Rules of amino acid convergence: Not how many, but who in avian vocal learning clades
Source: Research Square preprint supplement (doi:10.21203/rs.3.rs-100389/v1), 2020-11-09
Supplement: Supplementary file 8 [file ab008aa2a48b21c0fe1ca33e.xlsx]

## Sheet: Supplementary_Data_2
			1849		2065	1942	1388	1108	141	59	28	25	10	3	116	49	25	129	72	41	26	12	6	106	60	35
OrthologID	GeneSymbol(2019)	TAEGU_ENSEMBL_gID_rel67	DEG2014 (NUC vs other NUCS)	DEG2019 (NUC vs SUR)	DEG2020 (NUC vs SUR)	DEG2020 (NUC vs other NUCs	DEG2020 (SUR vs other SURs)	Singing 2014	AVL_CSAV	AVL_CSAV_morelikely_PS (lnLH1>lnLH0)	AVL_CSAV_significantly_PS (FDR<0.05)	AVL_iCSAV	AVL_iCSAV_morelikely_PS (lnLH1>lnLH0)	AVL_iCSAV_significantly_PS (FDR<0.05)	AVL_dCSAV	AVL_dCSAV_morelikely_PS (lnLH1>lnLH0)	AVL_dCSAV_significantly_PS (FDR<0.05)	Swift_CSAV	Swift_CSAV_morelikely_PS (lnLH1>lnLH0)	Swift_CSAV_significantly_PS (FDR<0.05)	Swift_iCSAV	Swift_iCSAV_morelikely_PS (lnLH1>lnLH0)	Swift_iCSAV_significantly_PS (FDR<0.05)	Swift_dCSAV	Swift_dCSAV_morelikely_PS (lnLH1>lnLH0)	Swift_dCSAV_significantly_PS (FDR<0.05)
8227	A1CF	ENSTGUG00000005090
2082	A4GNT	ENSTGUG00000006846
7955	AACS	ENSTGUG00000004908	Ax Down		LMAN Down	AreaX Down	AreaX Down
3029	AADAT	ENSTGUG00000006219
2505	AAGAB
5	AAK1	ENSTGUG00000003831	Ra Up				AreaX Down
10523	AARS2	ENSTGUG00000007880		LMAN Up				1
11734	AASDH	ENSTGUG00000007433	Ax Up			AreaX Up	AreaX Up
5048	AASDHPPT	ENSTGUG00000012671
10059	AASS	ENSTGUG00000004496			LMAN Down
6536	AATF
9496	ABAT	ENSTGUG00000004611	LMAN Up	LMAN Up	LMAN Up
8436	ABCA10	ENSTGUG00000003994																1	1	1				1	1	1
1141	ABCA12	ENSTGUG00000002904
7643	ABCA3	ENSTGUG00000003346						1
10867	ABCB10	ENSTGUG00000010005
14128	ABCB11	ENSTGUG00000007617
2462	ABCB7	ENSTGUG00000005819
8217	ABCB9	ENSTGUG00000005532		HVC Up	LMAN Up
9266	ABCC1	ENSTGUG00000005548	Ax Up
10619	ABCC10	ENSTGUG00000009082
9514	ABCC2	ENSTGUG00000009186
2383	ABCC3	ENSTGUG00000009151			HVC Down
9849	ABCC5	ENSTGUG00000010048		HVC Up,LMAN Up	LMAN Up			1
2112	ABCC6	ENSTGUG00000005678
1786	ABCD3	ENSTGUG00000005659
10550	ABCD4	ENSTGUG00000012116		HVC Down
14150	ABCE1	ENSTGUG00000002697
11629	ABCF2	ENSTGUG00000000046
2701	ABCF3	ENSTGUG00000010142
12605	ABCG1	ENSTGUG00000005541				AreaX Up,RA Down	AreaX Up
14431	ABCG2	ENSTGUG00000007742							1						1
2146	ABCG4	ENSTGUG00000000361			LMAN Up
3098	ABCG5	ENSTGUG00000003676
10449	ABCG8	ENSTGUG00000003716			HVC Up,RA Down													1	1					1	1
339	ABHD11
2714	ABHD12	ENSTGUG00000004985	Ra Up	HVC Up,LMAN Up,RA Up	LMAN Up,RA Up	RA Up	RA Up
12890	ABHD13	ENSTGUG00000010793
12170	ABHD17B	ENSTGUG00000000836
9180	ABHD17C	ENSTGUG00000008006	Ax Up			AreaX Up
10540	ABHD18	ENSTGUG00000002090
9283	ABHD2	ENSTGUG00000008271				AreaX Up
4425	ABHD3	ENSTGUG00000010308	Ax Down		AreaX Up,LMAN Up		RA Up
5309	ABHD5	ENSTGUG00000003814	Ax Down
8916	ABHD6	ENSTGUG00000007463	Ax Up
2390	ABI1	ENSTGUG00000001133	Ax Down	AreaX Down	LMAN Down			1
9977	ABI2	ENSTGUG00000009728						1
8268	ABL1	ENSTGUG00000004720	LMAN Up
8390	ABL2	ENSTGUG00000017391	Ax Up
11750	ABRACL	ENSTGUG00000010932					RA Up
3045	ABRAXAS2	ENSTGUG00000011455	Ax Up
9033	ABTB1	ENSTGUG00000008002	Ax Ra Up
11061	ABTB2	ENSTGUG00000005690			LMAN Up		RA Up	1
947	AC004475.1
7554	AC006254.1	ENSTGUG00000005545		HVC Up
1096	AC007950.1	ENSTGUG00000003160
8311	AC010761.1	ENSTGUG00000006190
2948	AC026316.4	ENSTGUG00000010952		AreaX Up,HVC Up,LMAN Up
9382	AC092338.1	ENSTGUG00000008969
4769	AC100868.1	ENSTGUG00000012542
13593	ACAD10	ENSTGUG00000006542			LMAN Up
13973	ACAD11	ENSTGUG00000004398
505	ACAD8	ENSTGUG00000000648
5943	ACAD9	ENSTGUG00000003909
6766	ACADL	ENSTGUG00000011392			LMAN Up		RA Up
2238	ACADS	ENSTGUG00000009634
3030	ACADSB	ENSTGUG00000011363
14146	ACAN	ENSTGUG00000008302		LMAN Up			RA Down
2224	ACAP2	ENSTGUG00000009012
581	ACAP3	ENSTGUG00000003217		HVC Down	LMAN Down		RA Down
5040	ACAT1	ENSTGUG00000012643		HVC Up
11076	ACAT2	ENSTGUG00000011404			LMAN Up	AreaX Down
2382	ACBD5	ENSTGUG00000001127
13265	ACBD7	ENSTGUG00000001367	Ax Down		HVC Up,LMAN Up		RA Up
13609	ACD	ENSTGUG00000005680																1	1					1	1
4843	ACE2	ENSTGUG00000007990
7515	ACER1	ENSTGUG00000000358
8132	ACLY	ENSTGUG00000002447	Ax Up				AreaX Up
11267	ACMSD	ENSTGUG00000011711			LMAN Up	AreaX Down	AreaX Down
10364	ACN9	ENSTGUG00000001650	Ax Up
3663	ACO2	ENSTGUG00000009907		HVC Up,LMAN Up	LMAN Up
4966	ACOD1	ENSTGUG00000012551				AreaX Up
12371	ACOT12	ENSTGUG00000006990					RA Up
11688	ACOT13	ENSTGUG00000009034				AreaX Down	RA Up
7253	ACOT7	ENSTGUG00000002611	Ax Down		LMAN Up	AreaX Down	AreaX Down,RA Up
12678	ACOT9	ENSTGUG00000007308						1
7715	ACOX1	ENSTGUG00000008167			LMAN Up
9421	ACOX2	ENSTGUG00000009192	Ra Up
12686	ACP1	ENSTGUG00000012949
9788	ACP2	ENSTGUG00000010486							1						1
4563	ACP6	ENSTGUG00000013525				AreaX Down
14464	ACRC	ENSTGUG00000006937
1045	ACSBG1
7566	ACSBG2	ENSTGUG00000000363	Ax Down	HVC Up		AreaX Down	AreaX Down	1
9341	ACSF2	ENSTGUG00000008946			LMAN Down
9110	ACSF3	ENSTGUG00000007811			LMAN Up
10691	ACSL1	ENSTGUG00000006718		HVC Up
1656	ACSL3	ENSTGUG00000007845
9741	ACSL4	ENSTGUG00000004291		HVC Down	LMAN Down			1
10024	ACSL5	ENSTGUG00000010742
9264	ACSL6	ENSTGUG00000001326			AreaX Up,HVC Up,LMAN Up		RA Up
702	ACSM3
1077	ACSS2	ENSTGUG00000004272		HVC Up,LMAN Up	LMAN Up
6730	ACTA2
6632	ACTL6A	ENSTGUG00000010657
2982	ACTN1	ENSTGUG00000011477	Ax Up	AreaX Down	RA Up	AreaX Up	AreaX Up,RA Down
11934	ACTN2	ENSTGUG00000010436		AreaX Up
2576	ACTR1A	ENSTGUG00000010114		HVC Up	LMAN Up	AreaX Down
14320	ACTR2	ENSTGUG00000002335
3729	ACTR3	ENSTGUG00000011659	Ax Up			AreaX Up	AreaX Up	1
9135	ACTR3B	ENSTGUG00000000635	Ax Down	LMAN Up	LMAN Up	AreaX Down	RA Up	1
1144	ACTR5	ENSTGUG00000004563
1711	ACTR8	ENSTGUG00000006945
11354	ACVR2A	ENSTGUG00000011916	Ra Down		LMAN Up
13269	ACVR2B	ENSTGUG00000000545
1320	ADA	ENSTGUG00000005206			LMAN Up
3964	ADA2	ENSTGUG00000012520		LMAN Up
3637	ADAD1	ENSTGUG00000001990																1	1	1				1	1	1
14301	ADAL	ENSTGUG00000005796				AreaX Up		1
8389	ADAM10	ENSTGUG00000006081				AreaX Up		1
11453	ADAM12	ENSTGUG00000011498																1						1
5365	ADAM17	ENSTGUG00000013028	Ax Up			AreaX Up		1
10067	ADAM22	ENSTGUG00000001399	Ax Up	AreaX Up	AreaX Up	AreaX Up
9918	ADAM23	ENSTGUG00000009963	Ax Down	HVC Up,LMAN Up,RA Up	HVC Up,LMAN Up,RA Up	AreaX Down
8119	ADAM8	ENSTGUG00000004723	Ax Down	LMAN Down	LMAN Down	AreaX Down,RA Up	AreaX Down	1
1087	ADAM9	ENSTGUG00000004989			LMAN Up
4636	ADAMTS1	ENSTGUG00000013483		AreaX Up,HVC Up	HVC Up
958	ADAMTS13
9034	ADAMTS2	ENSTGUG00000001108	Ra Up	RA Up
10311	ADAMTS20	ENSTGUG00000005861			RA Down
3571	ADAMTS3	ENSTGUG00000001593			LMAN Up	LMAN Up
12453	ADAMTS5	ENSTGUG00000013485	Ax Up		HVC Down	AreaX Up
2343	ADAMTS9	ENSTGUG00000009483			HVC Up
9071	ADAMTSL3	ENSTGUG00000007800
13578	ADAP1	ENSTGUG00000008402	Ax Down		LMAN Up	AreaX Down	AreaX Down
8078	ADAP2	ENSTGUG00000004917
7320	ADAT1	ENSTGUG00000008449			LMAN Down
10644	ADCK1	ENSTGUG00000012350						1
11489	ADCK2	ENSTGUG00000011650	Ax Up					1
8252	ADCY7	ENSTGUG00000008504
9644	ADCY9	ENSTGUG00000003956			LMAN Down	AreaX Down	AreaX Down
12395	ADD1	ENSTGUG00000010471
13472	ADD3	ENSTGUG00000010566	Ax Down	HVC Up	HVC Up	HVC Up
7371	ADGRD2	ENSTGUG00000007153
12834	ADGRF2	ENSTGUG00000013212
4827	ADGRG2	ENSTGUG00000007677		AreaX Down
6155	ADGRG6	ENSTGUG00000010957			LMAN Down	HVC Up
2808	ADGRL4	ENSTGUG00000006751
5410	ADH5	ENSTGUG00000003340
4222	ADHFE1	ENSTGUG00000011285
13308	ADI1	ENSTGUG00000012979						1
8872	ADIPOQ	ENSTGUG00000005467
6156	ADIPOR2	ENSTGUG00000012591		AreaX Up				1
9705	ADNP	ENSTGUG00000008662				AreaX Up		1
11416	ADNP2	ENSTGUG00000006688	Ax Up			AreaX Up
13548	ADORA2A	ENSTGUG00000010043				AreaX Up	AreaX Up
13067	ADORA2B	ENSTGUG00000006669			LMAN Up
475	ADORA3
587	ADPGK	ENSTGUG00000004179				AreaX Down	AreaX Down
12311	ADPRH	ENSTGUG00000013519			LMAN Up	AreaX Down
12878	ADPRHL1	ENSTGUG00000009227
730	ADPRHL2	ENSTGUG00000001622	Ax Up
7464	ADRA1B	ENSTGUG00000000206
6088	ADRA1D	ENSTGUG00000010933	Ax Down		LMAN Up	AreaX Down	AreaX Down	1
12369	ADRA2C	ENSTGUG00000010321	Ax Up			AreaX Up	AreaX Up	1
6680	ADRM1
6259	ADSL	ENSTGUG00000010111			LMAN Up	AreaX Down	RA Up
14020	ADSS	ENSTGUG00000008252	Ax Down
11065	ADSSL1	ENSTGUG00000012901	Ax Down	HVC Up,LMAN Up,RA Up
9298	AEN	ENSTGUG00000008335				AreaX Down
13908	AFAP1	ENSTGUG00000010189	Ra Up		LMAN Down	LMAN Down
10073	AFAP1L2	ENSTGUG00000010923
3488	AFDN	ENSTGUG00000009578
9417	AFF4	ENSTGUG00000000187
12238	AFG1L	ENSTGUG00000012136
4151	AFG3L2	ENSTGUG00000009632
2788	AFTPH	ENSTGUG00000002302	Ax Up			AreaX Up	AreaX Up
3325	AGA	ENSTGUG00000006468
9324	AGBL1	ENSTGUG00000008390
8428	AGGF1	ENSTGUG00000004021						1
11494	AGK	ENSTGUG00000011620	Ax Down	AreaX Up	LMAN Up
8815	AGL	ENSTGUG00000005336					RA Up
717	AGO3
12625	AGPAT3	ENSTGUG00000005961		LMAN Up	LMAN Up		RA Up
11045	AGPAT4	ENSTGUG00000009344			LMAN Down
2912	AGPS	ENSTGUG00000009031
10767	AGR2	ENSTGUG00000002578	Ax Down			HVC Up
10766	AGR3	ENSTGUG00000002580
10876	AGT	ENSTGUG00000009957	Ax Down					1
14502	AGTR1	ENSTGUG00000008842
8550	AGTRAP	ENSTGUG00000002347				AreaX Down
8117	AGXT2	ENSTGUG00000001974
7668	AHCY	ENSTGUG00000003666	Ax Down	HVC Up		AreaX Down
4178	AHI1	ENSTGUG00000011488				AreaX Up	AreaX Up
10770	AHR	ENSTGUG00000002585
4044	AHRR	ENSTGUG00000008731			LMAN Up	LMAN Up
10636	AHSA1	ENSTGUG00000012320			LMAN Up	AreaX Down	RA Up	1
8496	AHSA2P	ENSTGUG00000006674	Ax Up		LMAN Up		RA Up	1
9924	AHSG	ENSTGUG00000010437					RA Up
2970	AIDA	ENSTGUG00000002668
8255	AIF1L	ENSTGUG00000004809	Ra Up	AreaX Up,HVC Up,LMAN Up	HVC Up,LMAN Up		RA Up
8606	AIFM2	ENSTGUG00000004116
3282	AIMP1	ENSTGUG00000003915
8106	AIMP2	ENSTGUG00000008804			LMAN Up	AreaX Down	AreaX Down,RA Up
1604	AIPL1	ENSTGUG00000006620
11926	AK3	ENSTGUG00000005155	Ax Up		LMAN Up
10845	AK4	ENSTGUG00000010010
5481	AK6	ENSTGUG00000017529
3424	AK7	ENSTGUG00000012686			AreaX Up		RA Up
4045	AK8	ENSTGUG00000005193
1760	AKAP1	ENSTGUG00000008464							1						1			1	1	1				1	1	1
13969	AKAP12	ENSTGUG00000011284		HVC Up,LMAN Up	HVC Up,LMAN Up	AreaX Down,LMAN Up	RA Up
9336	AKAP13	ENSTGUG00000008410			HVC Up,LMAN Up
4892	AKAP17A	ENSTGUG00000010729				AreaX Up		1
3603	AKAP5	ENSTGUG00000012935	Ax Up	AreaX Down,HVC Down	HVC Down,LMAN Down	AreaX Up	RA Down
4635	AKIRIN2	ENSTGUG00000012437	Ax Up	AreaX Down				1
13473	AKR1A1	ENSTGUG00000007993
11559	AKR1B10L2	ENSTGUG00000012430
1277	AKR7A2	ENSTGUG00000016951
13338	AKT3	ENSTGUG00000008212	Ax Down			AreaX Down	AreaX Down
8183	AKTIP	ENSTGUG00000007406	Ax Down				AreaX Down
12459	AL049697.1	ENSTGUG00000012461
13976	AL162171.1	ENSTGUG00000012408
6140	AL590327.1
2800	ALAD	ENSTGUG00000002610
13763	ALAS1	ENSTGUG00000006069
3583	ALB	ENSTGUG00000001572
4532	ALCAM	ENSTGUG00000013613	Ax Up	AreaX Up	AreaX Up	AreaX Up
10649	ALDH18A1	ENSTGUG00000011707
4480	ALDH1A1	ENSTGUG00000000800
5675	ALDH1A2	ENSTGUG00000006178	HVC LMAN Up	HVC Up,LMAN Up	HVC Up,LMAN Up	AreaX Down	LMAN Up	1
9419	ALDH1A3	ENSTGUG00000008854			LMAN Up,RA Down		RA Up
11432	ALDH1L2	ENSTGUG00000011095				AreaX Down	AreaX Down
1499	ALDH2	ENSTGUG00000006552			LMAN Up
11424	ALDH5A1	ENSTGUG00000006463			LMAN Up
3178	ALDH6A1					AreaX Down
9796	ALDH7A1	ENSTGUG00000001320		AreaX Down	AreaX Down
11791	ALDH8A1	ENSTGUG00000011520
1123	ALDH9A1	ENSTGUG00000017326					RA Up
12344	ALDOB	ENSTGUG00000000650
12949	ALG11	ENSTGUG00000012066				AreaX Up	AreaX Up
9902	ALG12	ENSTGUG00000003862	Ax Down					1
1764	ALG14	ENSTGUG00000005611
4087	ALG2	ENSTGUG00000008879
5008	ALG5	ENSTGUG00000011903
14041	ALG6	ENSTGUG00000009888
5219	ALG8	ENSTGUG00000013014
10088	ALK	ENSTGUG00000005416		HVC Down
12687	ALKAL2	ENSTGUG00000012951
10640	ALKBH1	ENSTGUG00000012335				AreaX Down
1597	ALKBH2	ENSTGUG00000007068
2544	ALKBH3	ENSTGUG00000010222
7598	ALKBH4	ENSTGUG00000004477							1						1			1						1
12548	ALMS1	ENSTGUG00000015416			HVC Down,LMAN Down		RA Down
1852	ALOX5
5016	ALOX5AP	ENSTGUG00000011710
3703	ALPK1	ENSTGUG00000001800							1						1			1						1
7954	ALPK2	ENSTGUG00000017489
2675	ALS2	ENSTGUG00000010168
8825	ALS2CL	ENSTGUG00000000211
10889	ALX1	ENSTGUG00000007899
10066	AMBP	ENSTGUG00000002486
2655	AMBRA1	ENSTGUG00000010628	Ax Up			AreaX Up
12130	AMD1	ENSTGUG00000012045						1
3520	AMDHD1	ENSTGUG00000008491
10169	AMDHD2	ENSTGUG00000003247
5027	AMER2	ENSTGUG00000011464			LMAN Down	AreaX Up
8013	AMFR	ENSTGUG00000006634	Ax Up		LMAN Up		AreaX Up	1
3048	AMIGO2	ENSTGUG00000006197	Ax Up		LMAN Down	AreaX Up,RA Down	AreaX Up,RA Down
2569	AMMECR1	ENSTGUG00000004360	Ax Up		AreaX Up	AreaX Up		1
7677	AMMECR1L	ENSTGUG00000005761
11517	AMN1	ENSTGUG00000011480
2527	AMOT	ENSTGUG00000006087
674	AMPD1	ENSTGUG00000000993
8904	AMPD3	ENSTGUG00000008001		LMAN Up	LMAN Up	AreaX Down,LMAN Up	AreaX Down
1383	AMZ1	ENSTGUG00000008055		HVC Down,LMAN Down	LMAN Down		AreaX Down
2624	ANAPC1	ENSTGUG00000007360
10445	ANAPC10	ENSTGUG00000002709
8466	ANAPC16	ENSTGUG00000004474				AreaX Down
9940	ANAPC2	ENSTGUG00000002756
11911	ANAPC4	ENSTGUG00000009328
8376	ANAPC5	ENSTGUG00000005947	Ax Up		HVC Down,LMAN Down	AreaX Up	RA Down
8250	ANAPC7	ENSTGUG00000005711
10601	ANGEL1	ENSTGUG00000012264				AreaX Up
10383	ANGEL2	ENSTGUG00000002995
12569	ANGPT1	ENSTGUG00000012208			RA Down		RA Up
8424	ANGPTL1	ENSTGUG00000017400
7323	ANGPTL2	ENSTGUG00000007478
10823	ANGPTL3	ENSTGUG00000009863
7247	ANGPTL4	ENSTGUG00000000086				AreaX Down		1
13778	ANGPTL5	ENSTGUG00000012765
9467	ANKDD1A	ENSTGUG00000009014	Ax Up			AreaX Up	AreaX Up	1
12090	ANKDD1B	ENSTGUG00000006217
2851	ANKEF1	ENSTGUG00000006163
6455	ANKFN1				HVC Down,LMAN Down	AreaX Up,LMAN Down	RA Down		1						1
7482	ANKFY1	ENSTGUG00000003986
11525	ANKH	ENSTGUG00000007404
10228	ANKIB1	ENSTGUG00000001471						1
692	ANKLE2	ENSTGUG00000008251
13726	ANKRA2	ENSTGUG00000005875	Ax Up					1
2059	ANKRD1	ENSTGUG00000008417
4941	ANKRD10	ENSTGUG00000008852	Ax Up	LMAN Down	LMAN Down	AreaX Up	RA Down
8738	ANKRD13A	ENSTGUG00000007473	Ax Down		LMAN Up			1
3482	ANKRD13C	ENSTGUG00000010275	Ax Up					1
2601	ANKRD16	ENSTGUG00000001936							1						1
11070	ANKRD17	ENSTGUG00000001580						1
1997	ANKRD22	ENSTGUG00000008300					AreaX Down
8566	ANKRD27	ENSTGUG00000009084			LMAN Up
10922	ANKRD28	ENSTGUG00000003060	Ax Up			AreaX Up	AreaX Up
13842	ANKRD29	ENSTGUG00000010477			RA Up
4429	ANKRD31	ENSTGUG00000006074
11538	ANKRD33B	ENSTGUG00000007573			LMAN Down
2342	ANKRD40	ENSTGUG00000009204
13283	ANKRD40CL	ENSTGUG00000009233	Ax Down
13035	ANKRD42	ENSTGUG00000012948
13092	ANKRD46	ENSTGUG00000012064						1
13777	ANKRD49	ENSTGUG00000012823
11130	ANKRD50	ENSTGUG00000002041	Ra Up
3770	ANKRD54	ENSTGUG00000010502
11995	ANKRD55	ENSTGUG00000002579		AreaX Down	LMAN Down	RA Down	RA Down
12439	ANKRD6	ENSTGUG00000012407				AreaX Up	AreaX Up
10092	ANKRD9	ENSTGUG00000005415	Ra Up		LMAN Up	AreaX Down
7251	ANKS3	ENSTGUG00000003801
7815	ANKS4B	ENSTGUG00000009109
3490	ANKZF1	ENSTGUG00000005834
11232	ANLN	ENSTGUG00000005487	Ax Down	AreaX Up,HVC Up	AreaX Up,HVC Up,LMAN Up	HVC Down	RA Up	1
9580	ANO1	ENSTGUG00000005385
11623	ANO3	ENSTGUG00000004669	Ax Up		AreaX Up	AreaX Up	AreaX Up
1204	ANO5	ENSTGUG00000004532				AreaX Down	AreaX Down
10333	ANO6	ENSTGUG00000006024
8421	ANO9	ENSTGUG00000006753																1	1		1	1
2563	ANP32A	ENSTGUG00000009670	Ax Up
11657	ANP32E	ENSTGUG00000004542			LMAN Down	AreaX Up	RA Down
13436	ANXA1	ENSTGUG00000000793
3009	ANXA10	ENSTGUG00000006030
14586	ANXA11	ENSTGUG00000006343	Ax Up			AreaX Up	AreaX Up
12683	ANXA13	ENSTGUG00000012446
8229	ANXA2	ENSTGUG00000005370	HVC LMAN Up	HVC Up	LMAN Up
13996	ANXA5	ENSTGUG00000001930		HVC Up,LMAN Up	HVC Up,LMAN Up		RA Up
8782	ANXA7	ENSTGUG00000007092	Ax Down			AreaX Down	AreaX Down
11230	AOAH	ENSTGUG00000005506		HVC Up	HVC Up,LMAN Up	AreaX Down	RA Up
9783	AOX1	ENSTGUG00000010409	Ra Up
11224	AP1AR	ENSTGUG00000001796						1
7300	AP1G1	ENSTGUG00000008285
8303	AP1M1	ENSTGUG00000000701						1
12772	AP1S2	ENSTGUG00000007944	Ax Down		LMAN Up		RA Up
1648	AP1S3	ENSTGUG00000007904
6521	AP2A2	ENSTGUG00000009676	Ax Down			AreaX Down	AreaX Down
7707	AP2B1	ENSTGUG00000004771	Ax Down	AreaX Down		AreaX Down
7052	AP3D1	ENSTGUG00000000284	LMAN Up, Ra Down
8696	AP3M1	ENSTGUG00000006678
8196	AP3M2	ENSTGUG00000005434	Ax Down			AreaX Down	AreaX Down
13960	AP3S1	ENSTGUG00000017542			LMAN Down
7519	AP4B1	ENSTGUG00000001565
8605	AP4E1	ENSTGUG00000006963				AreaX Up												1	1	1				1	1	1
3093	AP4S1	ENSTGUG00000011859
3712	AP5M1	ENSTGUG00000013050
1414	AP5Z1	ENSTGUG00000007760			RA Up
12157	APBA1	ENSTGUG00000001066	Ax Down		HVC Up,LMAN Up
9570	APBB1IP	ENSTGUG00000001140		AreaX Down			AreaX Up
54	APC	ENSTGUG00000001015	Ax Down		RA Down
283	APCDD1	ENSTGUG00000009758					AreaX Down	1
2389	APCDD1L	ENSTGUG00000008173	Ra Down
2480	APIP	ENSTGUG00000010056
399	APLP2	ENSTGUG00000000549						1
2741	APMAP	ENSTGUG00000006058	Ax Down	HVC Up	LMAN Up	AreaX Down
12749	APOB	ENSTGUG00000013166
14486	APOD	ENSTGUG00000008991		AreaX Up		HVC Down	RA Up
8301	APOH	ENSTGUG00000004239	Ra Up	AreaX Up,HVC Up,LMAN Up	AreaX Up,HVC Up,LMAN Up		RA Up
3618	APOLD1	ENSTGUG00000009382			LMAN Up
12677	APOO	ENSTGUG00000007280	Ra Up		LMAN Up		RA Up
9372	APOOL	ENSTGUG00000002477	Ra Up
12167	APOV1
11425	APPL2	ENSTGUG00000011070	Ra Up				RA Up
5702	APTX	ENSTGUG00000001441
8747	AQP1	ENSTGUG00000000342		HVC Down
2039	AQP12A	ENSTGUG00000005831
10557	AQP2
7822	AQP3	ENSTGUG00000001667	Ax Up	AreaX Down,HVC Down	AreaX Down	AreaX Up	AreaX Up
12166	AQP4	ENSTGUG00000010611	Ra Up		LMAN Up			1
860	AQP5
7821	AQP7	ENSTGUG00000001658	Ax Up
8413	AQP9	ENSTGUG00000006153		LMAN Up	HVC Up,LMAN Up	AreaX Down,LMAN Up	RA Up
10399	AQR	ENSTGUG00000011770	Ax Up	AreaX Up	AreaX Up	AreaX Up
815	ARAP3	ENSTGUG00000015074
12600	ARC	ENSTGUG00000012727	Ax Down	AreaX Down	RA Down	AreaX Down	AreaX Down,RA Up	1
2353	ARCN1	ENSTGUG00000000056
3361	AREG	ENSTGUG00000001551		AreaX Up	LMAN Down	AreaX Up	AreaX Up
10560	AREL1	ENSTGUG00000012150	Ax Up			AreaX Up	AreaX Up	1
14259	ARF1	ENSTGUG00000000233						1
1778	ARF4	ENSTGUG00000007295
8948	ARFGAP1	ENSTGUG00000007518
9803	ARFGAP2	ENSTGUG00000010515
6118	ARFGAP3					AreaX Up	RA Down
11753	ARFGEF3	ENSTGUG00000010902	HVC LMAN Up			RA Down
10504	ARFIP1	ENSTGUG00000005047
9070	ARFRP1	ENSTGUG00000007096
10288	ARG2	ENSTGUG00000011509	Ax Up				RA Down	1
12891	ARGLU1	ENSTGUG00000010800		LMAN Down	LMAN Down	AreaX Up		1
9841	ARHGAP1	ENSTGUG00000010593	Ax Down			AreaX Down
10477	ARHGAP10	ENSTGUG00000002594				AreaX Up
10361	ARHGAP11A	ENSTGUG00000011736
6835	ARHGAP17	ENSTGUG00000006254
13483	ARHGAP19	ENSTGUG00000009730		HVC Up,LMAN Up	HVC Up,LMAN Up
5036	ARHGAP20					AreaX Up,RA Down	AreaX Up,RA Down
8572	ARHGAP20	ENSTGUG00000002818				AreaX Up,RA Down	AreaX Up,RA Down
14411	ARHGAP22	ENSTGUG00000008148	Ax Down			AreaX Down	AreaX Down
7141	ARHGAP25	ENSTGUG00000003999
8912	ARHGAP29	ENSTGUG00000005720
4468	ARHGAP31	ENSTGUG00000013398				RA Up	RA Up
496	ARHGAP39	ENSTGUG00000003078
1139	ARHGAP40	ENSTGUG00000004541				AreaX Up
12789	ARHGAP6	ENSTGUG00000008308	Ax Up	AreaX Down	HVC Up	AreaX Up	AreaX Up
2686	ARHGDIA	ENSTGUG00000003498	Ax Down
5268	ARHGDIB	ENSTGUG00000009210	Ax Up	AreaX Down,HVC Down	AreaX Down,HVC Down,LMAN Down
1147	ARHGEF18	ENSTGUG00000000416	HVC LMAN Up		LMAN Down	HVC Up
8849	ARHGEF3	ENSTGUG00000007136		AreaX Up,LMAN Up	LMAN Up
401	ARHGEF37
7861	ARHGEF39	ENSTGUG00000001890
7728	ARHGEF4	ENSTGUG00000005587	Ax Up		HVC Down,LMAN Down	AreaX Up	AreaX Up,RA Down
5075	ARHGEF5	ENSTGUG00000011885
9186	ARHGEF6	ENSTGUG00000002111	HVC LMAN Up
9577	ARHGEF9	ENSTGUG00000005598	Ax Up		HVC Down,LMAN Down	AreaX Up	AreaX Up,RA Down	1
13962	ARID1B	ENSTGUG00000011113	Ax Up		LMAN Down	AreaX Up	AreaX Up,RA Down	1
453	ARID3B	ENSTGUG00000004014
8967	ARID3C	ENSTGUG00000001746
3689	ARID4A				AreaX Up,LMAN Down	AreaX Up	AreaX Up,RA Down
7172	ARID4B	ENSTGUG00000010246		LMAN Down		AreaX Up		1
7985	ARID5B	ENSTGUG00000005270		AreaX Down		RA Down		1
7622	ARIH1	ENSTGUG00000004209	Ax Up
2195	ARIH2	ENSTGUG00000009080						1
13785	ARL11	ENSTGUG00000012144			LMAN Up	LMAN Up
12285	ARL13B	ENSTGUG00000013493				AreaX Up
14439	ARL14EP	ENSTGUG00000004787	Ax Up			AreaX Up	AreaX Up
14624	ARL14EPL	ENSTGUG00000017544
444	ARL2BP	ENSTGUG00000005238			RA Down
9728	ARL3	ENSTGUG00000010164
10752	ARL4A	ENSTGUG00000002488		HVC Down	LMAN Down	AreaX Up
11372	ARL5A	ENSTGUG00000012080
2720	ARL5B	ENSTGUG00000001236						1
5246	ARL6	ENSTGUG00000013497
9315	ARL6IP1	ENSTGUG00000005889						1
14314	ARL6IP4	ENSTGUG00000005510				AreaX Down
6974	ARL8A	ENSTGUG00000001202
2640	ARL8B	ENSTGUG00000010307	Ax Down		LMAN Up	AreaX Down
7124	ARMC1	ENSTGUG00000011252						1
9820	ARMC10
9519	ARMC4	ENSTGUG00000001101
956	ARMC6	ENSTGUG00000001090				AreaX Down		1	1	1	1				1	1	1
2438	ARMC9	ENSTGUG00000009761	Ax Up		LMAN Down		RA Down											1	1	1				1	1	1
9595	ARMH3	ENSTGUG00000009880
11528	ARMT1	ENSTGUG00000011263						1
5142	ARNT
9188	ARNT2	ENSTGUG00000008015			LMAN Down,RA Down
13423	ARNTL	ENSTGUG00000015954						1
4205	ARNTL2	ENSTGUG00000012163	Ra Down		LMAN Down			1
8571	ARPC1A	ENSTGUG00000007594				LMAN Up		1
10999	ARPC2	ENSTGUG00000005170	Ax Up		LMAN Up	AreaX Up	AreaX Up
1218	ARPC3	ENSTGUG00000005696
9285	ARPC4	ENSTGUG00000008708
5104	ARPP19	ENSTGUG00000006651	Ax Up	AreaX Up,HVC Down		AreaX Up	AreaX Up,RA Down	1
11208	ARPP21	ENSTGUG00000001697	Ra Down	AreaX Down,HVC Down,LMAN Down,RA Down	LMAN Down,RA Down		RA Down
8407	ARR3	ENSTGUG00000002632
2699	ARRDC1	ENSTGUG00000002813	Ax Up			AreaX Up	AreaX Up,RA Down
1131	ARRDC2	ENSTGUG00000000411
2217	ARRDC4	ENSTGUG00000008606
12807	ARSE	ENSTGUG00000010759
8886	ARSI	ENSTGUG00000000885				RA Down
11200	ARSJ	ENSTGUG00000001839
11976	ARSK	ENSTGUG00000000742				AreaX Up
11108	ART4	ENSTGUG00000009246
5386	ARV1	ENSTGUG00000009892
9759	AS3MT	ENSTGUG00000010233
11677	ASAH1	ENSTGUG00000007052		HVC Up	HVC Up,LMAN Up		RA Up
4808	ASAP2	ENSTGUG00000013006
8416	ASB1	ENSTGUG00000003188				AreaX Down
11626	ASB10	ENSTGUG00000000054
12777	ASB11	ENSTGUG00000008102
10347	ASB4	ENSTGUG00000001584
10771	ASB5	ENSTGUG00000006421
9413	ASB7	ENSTGUG00000008846				AreaX Up
12778	ASB9	ENSTGUG00000008117
1399	ASCC1	ENSTGUG00000004483					RA Up
9732	ASCC2	ENSTGUG00000010495
14364	ASCL3	ENSTGUG00000008324
13199	ASCL4	ENSTGUG00000010960
12061	ASF1A	ENSTGUG00000011876						1
11966	ASH1L	ENSTGUG00000017419						1	1	1					1	1
1030	ASH2L	ENSTGUG00000004741
10214	ASIC5	ENSTGUG00000005392
12814	ASMT	ENSTGUG00000010733					RA Up
4893	ASMTL	ENSTGUG00000010718																1	1	1				1	1	1
10369	ASNS	ENSTGUG00000001657
14476	ASNSD1	ENSTGUG00000010885				AreaX Down	AreaX Down
1482	ASPA	ENSTGUG00000007044	Ra Up
11046	ASPG	ENSTGUG00000012891	Ax Down			AreaX Down	AreaX Down,RA Up	1
4561	ASPH	ENSTGUG00000011226			AreaX Up
737	ASPM	ENSTGUG00000004249																1						1
8586	ASPN	ENSTGUG00000005362
12508	ASRGL1	ENSTGUG00000012710						1
9254	ASXL1	ENSTGUG00000006483
12195	ASXL3	ENSTGUG00000010779	Ax Down
8191	ATAD1	ENSTGUG00000005005			LMAN Up
12752	ATAD2B	ENSTGUG00000013179				AreaX Up
488	ATAD3A	ENSTGUG00000003082			LMAN Up
1049	ATAD5	ENSTGUG00000004944
10277	ATE1	ENSTGUG00000011274
13119	ATF1	ENSTGUG00000003395	Ax Up	HVC Down
13490	ATF2	ENSTGUG00000008880		RA Down
10389	ATF3	ENSTGUG00000003050
7887	ATF6	ENSTGUG00000017057
9844	ATG13	ENSTGUG00000010603			LMAN Down			1
3724	ATG14	ENSTGUG00000013072
7526	ATG16L1	ENSTGUG00000007390
3422	ATG2B	ENSTGUG00000012679				AreaX Up
12200	ATG3	ENSTGUG00000013425		HVC Up
9136	ATG4B	ENSTGUG00000005940		LMAN Up	LMAN Up
10827	ATG4C	ENSTGUG00000009870						1
12272	ATG5	ENSTGUG00000012200	Ax Down
1577	ATG7	ENSTGUG00000004145
11071	ATG9A	ENSTGUG00000005783			RA Up
1146	ATIC	ENSTGUG00000002942					RA Up
11321	ATL1	ENSTGUG00000013160			RA Up	AreaX Down	AreaX Down
9889	ATL2	ENSTGUG00000002121	Ax Up			AreaX Up		1
4066	ATMIN	ENSTGUG00000004575			LMAN Down
8292	ATOH7	ENSTGUG00000003584
13361	ATOH8	ENSTGUG00000010695
8375	ATOX1	ENSTGUG00000000767			LMAN Up
13797	ATP11A	ENSTGUG00000008975
6650	ATP11B	ENSTGUG00000010523
2090	ATP11C	ENSTGUG00000002206	Ra Down			RA Down	RA Down
14376	ATP13A2	ENSTGUG00000016681
9400	ATP13A3	ENSTGUG00000009088						1
9442	ATP13A4	ENSTGUG00000009175
13866	ATP1A1	ENSTGUG00000013386	HVC LMAN Up	HVC Down,LMAN Down,RA Down	AreaX Up,LMAN Down	AreaX Down,HVC Up	AreaX Down	1
6062	ATP1B1	ENSTGUG00000013431	Ax Down	AreaX Up,HVC Up,LMAN Up,RA Up	HVC Up,LMAN Up	AreaX Down	RA Up
870	ATP1B3	ENSTGUG00000008432				HVC Up		1
2728	ATP1B4	ENSTGUG00000003461
3052	ATP23	ENSTGUG00000006218
5699	ATP2A2	ENSTGUG00000005728	Ax Up	AreaX Up,HVC Down	AreaX Up,LMAN Down	AreaX Up	AreaX Up
3462	ATP2B1	ENSTGUG00000008087	HVC_RA Up	AreaX Down,HVC Down,LMAN Down	LMAN Down	LMAN Down	AreaX Up	1
3562	ATP2C1	ENSTGUG00000004081	Ax Up			AreaX Up	AreaX Up
8879	ATP2C2	ENSTGUG00000004269
13798	ATP4B	ENSTGUG00000009299
13671	ATP5IF1	ENSTGUG00000000899			LMAN Up	AreaX Down
435	ATP5MC1	ENSTGUG00000003449			LMAN Up
10185	ATP5MC3	ENSTGUG00000008907			LMAN Up	AreaX Down	RA Up
7479	ATP5PB	ENSTGUG00000001462
12431	ATP5PF	ENSTGUG00000013555
4690	ATP5PO	ENSTGUG00000000461	Ax Up		LMAN Up
11302	ATP5S
12373	ATP6AP1L	ENSTGUG00000006935			HVC Down	LMAN Up
13812	ATP6AP2	ENSTGUG00000006635	Ax Down
8059	ATP6V0A1	ENSTGUG00000002661	Ax Down	AreaX Down,HVC Down	LMAN Down	AreaX Down
1025	ATP6V0A2	ENSTGUG00000005182					RA Down	1
11476	ATP6V0A4	ENSTGUG00000011411
3137	ATP6V0B	ENSTGUG00000007525				AreaX Down	AreaX Down
2909	ATP6V0C	ENSTGUG00000003256				AreaX Down	AreaX Down
7740	ATP6V0D1	ENSTGUG00000005881	Ax Down			AreaX Down
12479	ATP6V0D2	ENSTGUG00000011739
13870	ATP6V1A	ENSTGUG00000013361	Ax Down	AreaX Down		AreaX Down	AreaX Down
7555	ATP6V1B2	ENSTGUG00000017296				AreaX Down		1
12561	ATP6V1C1	ENSTGUG00000012137	Ax Down				AreaX Down
12725	ATP6V1C2	ENSTGUG00000013053
10310	ATP6V1D	ENSTGUG00000011556	HVC LMAN Up
11546	ATP6V1E1	ENSTGUG00000012508	Ax Down	HVC Up		AreaX Down
7732	ATP6V1G3	ENSTGUG00000004383			HVC Up,LMAN Up
9678	ATP7A	ENSTGUG00000005981				AreaX Up
4999	ATP7B	ENSTGUG00000012069
8058	ATP8B1	ENSTGUG00000017491																1	1	1				1	1	1
7046	ATP8B3	ENSTGUG00000000215																1	1	1	1	1	1
2514	ATP9A	ENSTGUG00000008565		HVC Down
3869	ATP9B	ENSTGUG00000006549				AreaX Up		1
10629	ATPAF1	ENSTGUG00000008394			LMAN Up
1574	ATPAF2	ENSTGUG00000007278				AreaX Down
3969	ATPSCKMT	ENSTGUG00000007661
8565	ATRIP	ENSTGUG00000005323
11441	ATXN1	ENSTGUG00000005986	Ra Down		LMAN Down	AreaX Up	RA Down	1
11876	ATXN10	ENSTGUG00000011811
8551	ATXN2	ENSTGUG00000006497
9484	ATXN7	ENSTGUG00000009416				AreaX Up
9752	ATXN7L1	ENSTGUG00000002996				AreaX Up
7095	AUP1					AreaX Down
5562	AURKA	ENSTGUG00000008457
6813	AURKAIP1
369	AUTS2	ENSTGUG00000003492		HVC Down
12810	AvBD10	ENSTGUG00000013287
13297	AvBD11	ENSTGUG00000013288
13298	AvBD12	ENSTGUG00000013289
13299	AvBD13	ENSTGUG00000013290
13295	AvBD2	ENSTGUG00000013283
13824	AvBD8	ENSTGUG00000013285
13825	AvBD9	ENSTGUG00000013286
3742	AVL9	ENSTGUG00000005196
13677	AVPR1B	ENSTGUG00000017506
10274	AVPR2	ENSTGUG00000005614
2369	AXIN1	ENSTGUG00000004338	Ax Down
3522	AZI2	ENSTGUG00000003562
13806	AZIN1	ENSTGUG00000012128	Ax Down			HVC Up
8180	AZIN2	ENSTGUG00000001325
11785	B3GALNT2	ENSTGUG00000010280					AreaX Down
10805	B3GALT1	ENSTGUG00000007548		AreaX Down		AreaX Up	AreaX Up
7830	B3GALT2	ENSTGUG00000004183	LMAN Up, Ra Down	HVC Down	LMAN Up			1
7606	B3GALT6	ENSTGUG00000004073
5686	B3GAT1	ENSTGUG00000000632		AreaX Down	LMAN Down
12142	B3GAT1L	ENSTGUG00000013397		AreaX Down,HVC Down
5015	B3GLCT	ENSTGUG00000011725				RA Down	AreaX Up	1
14213	B3GNT10	ENSTGUG00000006504
10050	B3GNT2	ENSTGUG00000002218	Ax Up	RA Down		AreaX Up	AreaX Up	1	1	1		1	1
3955	B4GALNT3	ENSTGUG00000012627
13124	B4GALT1	ENSTGUG00000001463
12139	B4GALT4	ENSTGUG00000013395					AreaX Up
2564	B4GALT5	ENSTGUG00000008769		AreaX Down
12178	B4GALT6	ENSTGUG00000010735	Ax Up			AreaX Up	AreaX Up
14562	B4GALT7	ENSTGUG00000000370	Ax Down		AreaX Down,LMAN Up	AreaX Down
1628	B9D1	ENSTGUG00000007019
12591	BACE2	ENSTGUG00000005268	HVC_RA Up		HVC Up	HVC Up
12467	BACH1	ENSTGUG00000013585
12368	BACH2	ENSTGUG00000012380						1
11580	BAG1	ENSTGUG00000008182
12647	BAG2	ENSTGUG00000012795	Ax Down		LMAN Up	AreaX Down	AreaX Down,RA Up
11026	BAG5	ENSTGUG00000012866	Ra Down		HVC Up	HVC Up,RA Down	RA Down
1476	BAHD1	ENSTGUG00000007318				RA Up
8159	BAIAP2L1	ENSTGUG00000008652
11301	BAIAP2L2	ENSTGUG00000010447
8519	BAIAP3	ENSTGUG00000006611
1021	BAK1	ENSTGUG00000001826
2329	BAMBI	ENSTGUG00000001062	Ra Up				AreaX Down
3767	BANK1	ENSTGUG00000003579
8981	BANP	ENSTGUG00000007690
1386	BAP1	ENSTGUG00000006264		HVC Down	RA Up		RA Down
8136	BARD1	ENSTGUG00000002894
13345	BATF3	ENSTGUG00000003049
10476	BAZ1A	ENSTGUG00000011934			LMAN Down	AreaX Up	RA Down
11619	BBOX1	ENSTGUG00000005768
6376	BBS10	ENSTGUG00000007444	Ax Up			AreaX Up		1
14389	BBS2	ENSTGUG00000006547	Ax Up
592	BBS4
10404	BBS5	ENSTGUG00000007830
11154	BBS7	ENSTGUG00000001949				AreaX Up
4534	BBX	ENSTGUG00000013611	Ax Ra Up 2			AreaX Up	AreaX Up	1
2552	BCAP29	ENSTGUG00000003129	Ax Down
8961	BCAR3	ENSTGUG00000005886		HVC Up
2465	BCAS1	ENSTGUG00000008550	Ra Up	AreaX Up,HVC Up,LMAN Up	LMAN Up		RA Up											1	1	1				1	1	1
7654	BCAS2	ENSTGUG00000001012						1
3995	BCAT1	ENSTGUG00000011740
2088	BCCIP	ENSTGUG00000011485				HVC Up
6090	BCKDHB	ENSTGUG00000012570			LMAN Up		RA Up
2746	BCL10	ENSTGUG00000006455			LMAN Down
10881	BCL11B	ENSTGUG00000012711	Ax Up			AreaX Up
9218	BCL2A1	ENSTGUG00000008084
3966	BCL2L13	ENSTGUG00000012506
9505	BCL6	ENSTGUG00000009413		HVC Up		AreaX Down,HVC Up	AreaX Down
1391	BCL7A	ENSTGUG00000006155	Ra Down			AreaX Up
12316	BCL9	ENSTGUG00000013523	HVC_RA Up	AreaX Down,LMAN Down
9606	BCL9L	ENSTGUG00000000025			LMAN Down
4173	BCLAF1	ENSTGUG00000010835			LMAN Down	AreaX Up		1
4807	BCLAF3					AreaX Up	AreaX Up
8816	BCO1	ENSTGUG00000004509
9286	BCR					AreaX Up
3509	BCS1L	ENSTGUG00000005562
9366	BDH1	ENSTGUG00000008967						1
11320	BDH2	ENSTGUG00000003730
10863	BDKRB2	ENSTGUG00000012678
11255	BDNF	ENSTGUG00000004743		LMAN Down	LMAN Down	AreaX Down,HVC Up	AreaX Down
7814	BDP1	ENSTGUG00000001540
8768	BEAN1	ENSTGUG00000009810
6688	BECN1	ENSTGUG00000002784			LMAN Up
10930	BEGAIN	ENSTGUG00000012772		AreaX Down	LMAN Down,RA Down
12768	BEND2	ENSTGUG00000007795
12241	BEND3	ENSTGUG00000012175			LMAN Up
11878	BEND4	ENSTGUG00000008584
10645	BEND5	ENSTGUG00000008591						1
12648	BEND6	ENSTGUG00000012798		LMAN Up	HVC Up,LMAN Up		RA Up	1
2109	BEND7	ENSTGUG00000002282	Ra Up
9452	BEST1	ENSTGUG00000005934
10475	BEST3	ENSTGUG00000006968																1			1
7111	BET1	ENSTGUG00000001519
991	BFAR	ENSTGUG00000004956			AreaX Up	AreaX Up
9986	BFSP1	ENSTGUG00000002401
11097	BFSP2	ENSTGUG00000004473
1119	BHLHA15
2638	BHLHE40	ENSTGUG00000010301	Ax Down	LMAN Down	LMAN Down	AreaX Down,HVC Up	AreaX Down
7599	BICC1	ENSTGUG00000005584
11515	BICD1	ENSTGUG00000011484	Ax Down		HVC Up
8761	BICD2	ENSTGUG00000003548	Ax Up			AreaX Up
9490	BICDL1	ENSTGUG00000009346
10432	BICRAL	ENSTGUG00000003367			LMAN Down	AreaX Up		1
3967	BID	ENSTGUG00000012503
4212	BIK
11033	BIN1	ENSTGUG00000004882	Ax Down		RA Down
3278	BIRC6	ENSTGUG00000008833
8939	BIRC7	ENSTGUG00000007560			LMAN Down				1						1
4945	BIVM
1235	BLCAP
4880	BLK	ENSTGUG00000013299
2625	BLM	ENSTGUG00000009959	Ax Up
1349	BLMH	ENSTGUG00000006538
2204	BLNK
6771	BLOC1S2	ENSTGUG00000007766						1
11675	BLOC1S4	ENSTGUG00000008890	Ax Up			AreaX Up	AreaX Up	1
3901	BLOC1S5	ENSTGUG00000002370
8931	BLOC1S6	ENSTGUG00000007369
11323	BLVRA	ENSTGUG00000001814		HVC Up	LMAN Up
4497	BLZF1	ENSTGUG00000013429
11951	BMF	ENSTGUG00000011592
10017	BMP2	ENSTGUG00000006434			LMAN Down	LMAN Down
3367	BMP2K	ENSTGUG00000001513							1	1					1	1
10790	BMP3					AreaX Up
12653	BMP5	ENSTGUG00000012830
9598	BMP7	ENSTGUG00000008348	Ra Up				RA Up
7655	BMPR1A	ENSTGUG00000005714
3743	BMPR1B	ENSTGUG00000003164			LMAN Down	RA Up
9877	BMPR2	ENSTGUG00000010107	Ax Down
6481	BMT2	ENSTGUG00000005414
1912	BNC1	ENSTGUG00000007753			LMAN Down
12154	BNC2	ENSTGUG00000004482			AreaX Up
910	BNIP1	ENSTGUG00000000316
1212	BNIP2	ENSTGUG00000005412				AreaX Up
3259	BNIP3	ENSTGUG00000011638
7158	BNIP3L	ENSTGUG00000004223		AreaX Down	LMAN Down			1
919	BOD1	ENSTGUG00000000324
8943	BOK	ENSTGUG00000006098	Ax Up	HVC Down	HVC Down,LMAN Down	AreaX Up	RA Down	1
2586	BOLL	ENSTGUG00000010496
13789	BORA	ENSTGUG00000012496			LMAN Down		RA Down
13921	BORCS5	ENSTGUG00000012714			LMAN Down		RA Down
11958	BORCS8
11557	BPGM						AreaX Down
13993	BPIFC	ENSTGUG00000010945
14144	BPNT1	ENSTGUG00000002789
11490	BRAF	ENSTGUG00000011632				AreaX Up
14237	BRAP	ENSTGUG00000006520
8441	BRAT1	ENSTGUG00000008077
12969	BRCA2	ENSTGUG00000011763							1						1
6818	BRCC3
843	BRD3	ENSTGUG00000005739	Ax Up	AreaX Up	LMAN Down	AreaX Up	RA Down	1
1211	BRD7	ENSTGUG00000008471	Ax Up	HVC Up		AreaX Up
8032	BRD8	ENSTGUG00000000354
3833	BRD9	ENSTGUG00000006776
1906	BRDT	ENSTGUG00000006116
5656	BRI3	ENSTGUG00000008663				AreaX Down
921	BRI3BP	ENSTGUG00000004948	Ax Up	HVC Down	LMAN Down
9375	BRINP1	ENSTGUG00000003350		HVC Up,RA Up	LMAN Up
6562	BRIP1	ENSTGUG00000007767							1						1
8094	BRIX1	ENSTGUG00000001961
10499	BRMS1L	ENSTGUG00000012002						1
10236	BROX	ENSTGUG00000002660
242	BRPF3	ENSTGUG00000001612		HVC Down	LMAN Down	AreaX Up	AreaX Up,RA Down
9174	BRS3	ENSTGUG00000002096	Ra Down	AreaX Up	AreaX Up
9281	BRSK2	ENSTGUG00000009471						1
1089	BSDC1	ENSTGUG00000001376						1
7031	BSG	ENSTGUG00000000614						1
9362	BTAF1	ENSTGUG00000009009	Ax Up		AreaX Up	AreaX Up
9041	BTBD1	ENSTGUG00000007705	Ax Down					1
1708	BTBD10	ENSTGUG00000015919	Ax Down		LMAN Up	AreaX Down
11417	BTBD11	ENSTGUG00000010981		AreaX Down,HVC Up	LMAN Up	LMAN Up
7359	BTBD2	ENSTGUG00000000274
11096	BTBD6	ENSTGUG00000012927	Ra Down	AreaX Up,HVC Up	HVC Up,LMAN Up,RA Up	RA Down	AreaX Up,RA Down
10774	BTBD7	ENSTGUG00000012623				AreaX Up
1896	BTBD8	ENSTGUG00000006105
9020	BTBD8	ENSTGUG00000006099	Ra Down
3151	BTBD9	ENSTGUG00000007817				AreaX Up		1
10918	BTD	ENSTGUG00000003052	Ra Up
10669	BTF3L4	ENSTGUG00000008906				AreaX Up		1
10950	BTG1	ENSTGUG00000008207	Ax Up	HVC Down	LMAN Down	AreaX Up	AreaX Up
1133	BTG2
1585	BTK
13480	BTRC	ENSTGUG00000010007						1
2619	BUB1	ENSTGUG00000007339
6878	BUB1B	ENSTGUG00000007225				AreaX Up
8626	BUB1B-PAK6	ENSTGUG00000007255	HVC LMAN Up	AreaX Down,HVC Down,RA Down				1
13459	BUB3	ENSTGUG00000011382						1
4319	BUD23	ENSTGUG00000003541
8579	BUD31	ENSTGUG00000007584
14027	BZW2	ENSTGUG00000002567	Ax Up	LMAN Down,RA Down	LMAN Down	AreaX Up		1
7989	C10orf107	ENSTGUG00000005288
2415	C10orf12
6115	C10orf12	ENSTGUG00000009640
6346	C10orf140
14333	C10orf28	ENSTGUG00000009574
2114	C10orf47	ENSTGUG00000002158	Ax Down
1868	C11orf16	ENSTGUG00000008326
9804	C11orf49	ENSTGUG00000010527		LMAN Up
13024	C11orf54	ENSTGUG00000012850
1922	C11orf58	ENSTGUG00000008555						1
13001	C11orf87	ENSTGUG00000012604	Ax Up	HVC Down
14266	C11orf89	ENSTGUG00000009387
3442	C12orf29	ENSTGUG00000007945
11516	C12orf35	ENSTGUG00000011482	Ax Up						1						1			1						1
13048	C12orf4	ENSTGUG00000012261
2199	C12orf43	ENSTGUG00000009701
11434	C12orf45	ENSTGUG00000011119
9791	C12orf49	ENSTGUG00000010337
11002	C12orf55	ENSTGUG00000008665							1	1	1				1	1	1
3530	C12orf63	ENSTGUG00000008673
1092	C12orf65	ENSTGUG00000005440
10392	C12orf66	ENSTGUG00000006440
3467	C12orf74	ENSTGUG00000008208
9217	C13H5orf15	ENSTGUG00000001303						1
3710	C14orf105
3709	C14orf37	ENSTGUG00000013046	Ax Up	AreaX Up
5453	C14orf39	ENSTGUG00000012996																1	1					1	1
5643	C15orf40	ENSTGUG00000007701
10382	C15orf41	ENSTGUG00000011754
8486	C15orf62	ENSTGUG00000006683	Ax Down	AreaX Down,LMAN Down				1
9192	C16orf45	ENSTGUG00000005321		HVC Down
2903	C16orf59	ENSTGUG00000003287
8034	C16orf70	ENSTGUG00000006686						1
2310	C16orf72	ENSTGUG00000004742
5103	C16orf87	ENSTGUG00000008847
5198	C16orf88	ENSTGUG00000009313	Ax Down
8610	C17H9orf16	ENSTGUG00000003849
8917	C17orf108	ENSTGUG00000008686
14615	C17orf67	ENSTGUG00000009523
1100	C17orf75	ENSTGUG00000004819
11572	C18orf21	ENSTGUG00000008036	Ax Up					1
7571	C18orf25	ENSTGUG00000001578
4115	C18orf63
620	C19orf21	ENSTGUG00000000640
7058	C19orf35	ENSTGUG00000000321
5822	C19orf44	ENSTGUG00000000685
10000	C1D	ENSTGUG00000002367
3054	C1GALT1	ENSTGUG00000001666	Ax Up			AreaX Up
2709	C1GALT1C1
13170	C1H21ORF33	ENSTGUG00000006045	Ax Up	HVC Up,LMAN Up				1
1078	C1orf112	ENSTGUG00000017309
6839	C1orf116
13336	C1orf131	ENSTGUG00000009866	HVC LMAN Up
13666	C1orf159	ENSTGUG00000004050
10772	C1orf168	ENSTGUG00000009595																1	1		1	1
14489	C1orf222	ENSTGUG00000002980
8602	C1QA	ENSTGUG00000017238
8603	C1QB	ENSTGUG00000017237				AreaX Down		1
7538	C1QBP	ENSTGUG00000004243	Ax Down
9979	C1QL2	ENSTGUG00000011570				AreaX Down
7605	C1QTNF12	ENSTGUG00000004074
7483	C1QTNF2	ENSTGUG00000000195			LMAN Up
1068	C1QTNF3-AMACR	ENSTGUG00000001951
2572	C1QTNF4	ENSTGUG00000010341	LMAN Up, Ra Down	AreaX Down,HVC Down,RA Down	AreaX Down,HVC Down,RA Down	LMAN Up
3817	C1QTNF6				HVC Down
11947	C1QTNF7	ENSTGUG00000009819
8763	C1QTNF8	ENSTGUG00000006866
11971	C1R	ENSTGUG00000013261		HVC Up
7364	C20H20ORF24	ENSTGUG00000003394
9616	C20orf43	ENSTGUG00000008397						1
5565	C20orf85	ENSTGUG00000008244	Ax Up
8615	C21H1orf50	ENSTGUG00000017254
9536	C21orf58	ENSTGUG00000011218
4676	C21orf62
4617	C21orf91	ENSTGUG00000013549						1
3768	C22orf23	ENSTGUG00000010482
11370	C22orf33	ENSTGUG00000010692
4744	C2CD2	ENSTGUG00000005496	HVC LMAN Up			AreaX Down
4926	C2orf40	ENSTGUG00000009727	Ax Up
5561	C2orf47	ENSTGUG00000010466
4925	C2orf49	ENSTGUG00000009750
13306	C2orf50	ENSTGUG00000013066
10032	C2orf55	ENSTGUG00000003312
13694	C2orf66
13450	C2orf76	ENSTGUG00000011562						1
10395	C2orf77	ENSTGUG00000007922
9443	C3orf14	ENSTGUG00000009334	Ax Down
12280	C3orf38	ENSTGUG00000013490
2268	C3orf67								1						1
377	C4BPA
13366	C4orf19	ENSTGUG00000009142
11223	C4orf21	ENSTGUG00000001801
3140	C4orf33
6475	C5	ENSTGUG00000006567
11508	C5orf22	ENSTGUG00000001970
2021	C5orf24	ENSTGUG00000001258						1
12223	C5orf30	ENSTGUG00000000948						1
12054	C5orf34	ENSTGUG00000002291
4401	C5orf51	ENSTGUG00000002256	Ax Down					1
13991	C5orf63	ENSTGUG00000006493
4398	C6	ENSTGUG00000002207
10910	C6orf120	ENSTGUG00000009738
12041	C6orf174	ENSTGUG00000011759
12242	C6orf203	ENSTGUG00000012177
11447	C6orf52	ENSTGUG00000005908
13246	C6orf62	ENSTGUG00000009025
12045	C7	ENSTGUG00000002197
11318	C7orf25	ENSTGUG00000001831
8328	C7orf50	ENSTGUG00000008340	Ax Down
10775	C8A	ENSTGUG00000009598
3357	C8B	ENSTGUG00000009617							1	1		1	1
6490	C8H1ORF146	ENSTGUG00000006096	Ax Up
13478	C8orf33	ENSTGUG00000003243
12528	C8orf37	ENSTGUG00000011955
13229	C8orf38	ENSTGUG00000011949
11825	C8orf46
9571	C8orf48	ENSTGUG00000005556	Ax Up					1
14197	C9ORF152	ENSTGUG00000000563							1						1
6378	C9orf71	ENSTGUG00000005666
7612	C9orf72	ENSTGUG00000001401
8366	C9orf78	ENSTGUG00000004486						1
8749	C9orf89	ENSTGUG00000003624
8030	C9orf96	ENSTGUG00000005535																1						1
7986	CA10	ENSTGUG00000009427		AreaX Down,HVC Down,LMAN Down	HVC Down,LMAN Down		RA Down
12461	CA13	ENSTGUG00000011722
12477	CA2	ENSTGUG00000011728	Ra Up	AreaX Up,LMAN Up
12462	CA3	ENSTGUG00000018507
8800	CA4	ENSTGUG00000007977	Ax Down		LMAN Up
8973	CA5B	ENSTGUG00000007678	Ax Down
7799	CA6	ENSTGUG00000003847		HVC Up
8736	CA7	ENSTGUG00000009706			LMAN Up	RA Down		1
4557	CA8	ENSTGUG00000011176		HVC Down		AreaX Down	AreaX Down
8863	CAB39	ENSTGUG00000005413						1
4993	CAB39L	ENSTGUG00000012160	Ax Down			AreaX Down	AreaX Down
2018	CABIN1	ENSTGUG00000010199		AreaX Down,HVC Down	HVC Down,LMAN Down		RA Down	1
12106	CABLES1	ENSTGUG00000010373	Ax Up		LMAN Down	AreaX Up
1698	CABLES2	ENSTGUG00000007738		HVC Up	HVC Up,LMAN Up		AreaX Down
2255	CABP1	ENSTGUG00000009611	Ra Down	AreaX Up,HVC Up,RA Up	HVC Up,RA Up	AreaX Down,HVC Up		1
14260	CACFD1	ENSTGUG00000005565
10842	CACHD1	ENSTGUG00000009951		HVC Down
3962	CACNA1C	ENSTGUG00000012538	Ax Up		LMAN Down	AreaX Up	AreaX Up
13758	CACNA1D	ENSTGUG00000006839		AreaX Down,HVC Down,RA Down	LMAN Down,RA Down
3717	CACNA1I				AreaX Down		RA Down
6230	CACNB4	ENSTGUG00000012082	Ra Down		LMAN Up	RA Down	RA Down	1
8279	CACNG1	ENSTGUG00000004397					RA Down
1243	CACNG4	ENSTGUG00000004385	HVC LMAN Up	AreaX Down,HVC Down,LMAN Down	HVC Down,LMAN Down
8283	CACNG5	ENSTGUG00000004375	LMAN Up, Ra Down	HVC Down	HVC Down		RA Down
8522	CACYBP	ENSTGUG00000003273			LMAN Up	AreaX Down	RA Up	1
12700	CALB1	ENSTGUG00000011825		HVC Down	RA Down		LMAN Down	1
1919	CALCB	ENSTGUG00000008509	LMAN Up	LMAN Up	HVC Up,LMAN Up	LMAN Up
829	CALCR	ENSTGUG00000001514	Ax Down	HVC Up,LMAN Up	HVC Up,LMAN Up	AreaX Down	RA Up
7875	CALCRL	ENSTGUG00000011077			RA Up
3976	CALD1	ENSTGUG00000012449	Ax Ra Up
9811	CALHM1	ENSTGUG00000010322
9810	CALHM2	ENSTGUG00000010317
2631	CALHM3	ENSTGUG00000010326
12087	CALHM4	ENSTGUG00000011935
13974	CALM1	ENSTGUG00000012465		AreaX Up	AreaX Up
3076	CAMK1D	ENSTGUG00000002216	HVC LMAN Up	AreaX Down	AreaX Down,HVC Up,LMAN Up	RA Down	AreaX Up,RA Down
432	CAMK1G	ENSTGUG00000001506		HVC Down,LMAN Down	AreaX Down,LMAN Down,RA Down
526	CAMKK1	ENSTGUG00000004191	Ra Down		LMAN Down,RA Up		RA Down
1280	CAMKK2	ENSTGUG00000005920	Ax Up	AreaX Up	LMAN Down	AreaX Up	AreaX Up,RA Down
6339	CAMKMT	ENSTGUG00000003843
6773	CAMLG	ENSTGUG00000001268						1
7548	CAMSAP1	ENSTGUG00000006408	Ax Up	RA Down	LMAN Down	AreaX Up
7710	CAMSAP2	ENSTGUG00000004476						1
10424	CAND1	ENSTGUG00000006691
11128	CANT1	ENSTGUG00000003205				AreaX Down
14480	CANX	ENSTGUG00000001054			LMAN Up			1
1247	CAP1	ENSTGUG00000001218	Ra Up	AreaX Down	LMAN Up
11444	CAP2	ENSTGUG00000005956	Ax Up	AreaX Up,HVC Down	AreaX Up	AreaX Up
9830	CAPN10	ENSTGUG00000010021			LMAN Down	AreaX Up
10536	CAPN11	ENSTGUG00000008009	Ax Down	HVC Up	LMAN Up	AreaX Down	RA Up
10109	CAPN13	ENSTGUG00000004674
2873	CAPN14	ENSTGUG00000004597
13413	CAPN3	ENSTGUG00000011081		HVC Up	HVC Up
234	CAPN5	ENSTGUG00000013052			LMAN Up		RA Up
9710	CAPN6	ENSTGUG00000006206
10221	CAPN8	ENSTGUG00000002633
4220	CAPRIN1				LMAN Up
11520	CAPRIN2	ENSTGUG00000011456
3177	CAPS2	ENSTGUG00000007358					RA Down
14447	CAPZA1	ENSTGUG00000017536					AreaX Up	1
10224	CAPZA2	ENSTGUG00000005077
1286	CAPZB	ENSTGUG00000016970			LMAN Up			1
8462	CARD11	ENSTGUG00000008023					LMAN Down
7619	CARD9	ENSTGUG00000006314				AreaX Up
2698	CARF	ENSTGUG00000010076				AreaX Up
9488	CARHSP1	ENSTGUG00000004665		AreaX Down	AreaX Down	AreaX Up	AreaX Up
12180	CARNMT1	ENSTGUG00000000768
9184	CARS	ENSTGUG00000009099
4940	CARS2	ENSTGUG00000008828
4193	CASC1
4075	CASC3	ENSTGUG00000002300		LMAN Down	AreaX Down		RA Down
9787	CASC4	ENSTGUG00000009914
8547	CASC5	ENSTGUG00000018415
10338	CASD1	ENSTGUG00000001556
11263	CASP6	ENSTGUG00000004148
4594	CASP8AP2					AreaX Up
7448	CASP9	ENSTGUG00000017156						1
12117	CASQ2	ENSTGUG00000013390
6494	CAV1	ENSTGUG00000005250				RA Up
2962	CAV2	ENSTGUG00000005256	Ra Up		LMAN Up	AreaX Down,RA Up	RA Up
987	CBFA2T2	ENSTGUG00000003776	LMAN Up	AreaX Up	HVC Down	LMAN Up		1
14387	CBFB	ENSTGUG00000006680			LMAN Down	AreaX Up		1
9309	CBL	ENSTGUG00000000375
2537	CBLL1	ENSTGUG00000003173			LMAN Down	AreaX Up	RA Down
4701	CBR1	ENSTGUG00000004746
3159	CBWD1	ENSTGUG00000005631
14009	CBX3	ENSTGUG00000002876				AreaX Up
6253	CBX7	ENSTGUG00000010271			LMAN Down		RA Down
11278	CBY1	ENSTGUG00000010375		AreaX Down
8351	CCAR1	ENSTGUG00000003765	Ax Up			AreaX Up	AreaX Up
7865	CCBE1	ENSTGUG00000001894			LMAN Down		AreaX Down
6157	CCDC112	ENSTGUG00000001336
1825	CCDC117	ENSTGUG00000007935
4978	CCDC122	ENSTGUG00000012356
4580	CCDC125	ENSTGUG00000017531
10821	CCDC126	ENSTGUG00000002803
11588	CCDC127	ENSTGUG00000008296
8783	CCDC13	ENSTGUG00000000260							1	1					1	1
11166	CCDC134	ENSTGUG00000009807					AreaX Up,RA Down	1
3602	CCDC14					AreaX Up
10087	CCDC141	ENSTGUG00000009285
2639	CCDC146	ENSTGUG00000002738		HVC Up														1	1	1				1	1	1
11388	CCDC148	ENSTGUG00000012199
5134	CCDC149	ENSTGUG00000009438
14228	CCDC152	ENSTGUG00000002272
3160	CCDC167	ENSTGUG00000007918						1
3949	CCDC170	ENSTGUG00000011261
10150	CCDC172	ENSTGUG00000011020
1857	CCDC18	ENSTGUG00000005935			AreaX Up
4496	CCDC181	ENSTGUG00000013428	Ax Down			AreaX Down	AreaX Down
2835	CCDC186	ENSTGUG00000010893	HVC LMAN Up		RA Down	RA Down		1
6065	CCDC191	ENSTGUG00000013407
4857	CCDC25
7343	CCDC27	ENSTGUG00000002741
4146	CCDC28A	ENSTGUG00000010912	Ax Down			AreaX Down	AreaX Down
13098	CCDC3	ENSTGUG00000002240
1472	CCDC32	ENSTGUG00000007330
3738	CCDC34	ENSTGUG00000004699
13754	CCDC36	ENSTGUG00000008762
9125	CCDC37	ENSTGUG00000008217
2225	CCDC40	ENSTGUG00000003135																1	1					1	1
7234	CCDC47	ENSTGUG00000001935	Ax Up			AreaX Up
13551	CCDC48	ENSTGUG00000003975
13499	CCDC50	ENSTGUG00000009262
9197	CCDC51	ENSTGUG00000008430				AreaX Down
7908	CCDC57	ENSTGUG00000003891			LMAN Down
11918	CCDC58
3386	CCDC59	ENSTGUG00000007835	Ax Down
1013	CCDC6	ENSTGUG00000005517	HVC LMAN Up
1728	CCDC66	ENSTGUG00000007093	Ra Down		AreaX Up	AreaX Up
5063	CCDC67
8445	CCDC69	ENSTGUG00000000792							1	1					1	1
2142	CCDC71	ENSTGUG00000008773				AreaX Up
3713	CCDC73	ENSTGUG00000004942						1
3954	CCDC77	ENSTGUG00000012628	Ax Up			AreaX Up	AreaX Up
7808	CCDC78	ENSTGUG00000003602
13139	CCDC82	ENSTGUG00000012800	Ra Down				AreaX Up
2437	CCDC84	ENSTGUG00000000027	Ax Up		LMAN Down		RA Down
14475	CCDC85A	ENSTGUG00000006863
9747	CCDC88A	ENSTGUG00000007001		HVC Up	LMAN Up			1
10727	CCDC88C	ENSTGUG00000012531
13036	CCDC90B	ENSTGUG00000012950
1000	CCDC92	ENSTGUG00000005098	Ax Down
3720	CCDC93	ENSTGUG00000011578				AreaX Up
11173	CCK	ENSTGUG00000004682	Ax Up	HVC Down,LMAN Down	HVC Down,LMAN Down	AreaX Up	RA Down
11908	CCKAR	ENSTGUG00000009230
7987	CCL20	ENSTGUG00000008269
14533	CCL5	ENSTGUG00000003209
14630	CCLI5	ENSTGUG00000005022		AreaX Up,RA Up
9955	CCN1	ENSTGUG00000006428			HVC Down	AreaX Down	AreaX Down
7958	CCN2	ENSTGUG00000011626	Ax Down	LMAN Down,RA Down	HVC Down,LMAN Down,RA Down	RA Up	AreaX Down,RA Up	1
12630	CCN4	ENSTGUG00000012573		RA Down	LMAN Down,RA Down
8367	CCN5	ENSTGUG00000005202				AreaX Down
5375	CCN6	ENSTGUG00000011997
12964	CCNA1	ENSTGUG00000011881
13998	CCNA2	ENSTGUG00000001941
5683	CCNB2	ENSTGUG00000005982			HVC Up,LMAN Up
12309	CCNC	ENSTGUG00000012282
9563	CCND1	ENSTGUG00000005350	Ax Down	RA Up
1120	CCND3	ENSTGUG00000017447					RA Up
1537	CCNDBP1	ENSTGUG00000005606
8501	CCNE1	ENSTGUG00000008979
12525	CCNE2	ENSTGUG00000011936
2901	CCNF	ENSTGUG00000003290
7558	CCNG1	ENSTGUG00000001470			LMAN Down
12384	CCNH	ENSTGUG00000001165	Ax Up		LMAN Down
2194	CCNJ	ENSTGUG00000009052				AreaX Up
10887	CCNK	ENSTGUG00000012719						1
3042	CCNL1	ENSTGUG00000011231				AreaX Up	RA Down
504	CCNL2	ENSTGUG00000003114				AreaX Up		1
11272	CCNT2	ENSTGUG00000011715				AreaX Up
9401	CCNY	ENSTGUG00000000913	Ax Up			AreaX Up
9882	CCNYL1	ENSTGUG00000010055			LMAN Down	AreaX Up
9357	CCP110	ENSTGUG00000009379
8463	CCPG1	ENSTGUG00000006492						1
3667	CCR4	ENSTGUG00000018201
11104	CCR8L	ENSTGUG00000018123
11094	CCRL1	ENSTGUG00000004431
3421	CCSAP	ENSTGUG00000010059	Ax Up	HVC Down	HVC Down,LMAN Down	AreaX Up		1
10609	CCSER1	ENSTGUG00000003088				AreaX Up	AreaX Up
3106	CCT2	ENSTGUG00000006912	Ax Down		LMAN Up			1
2781	CCT4	ENSTGUG00000006478			LMAN Up	AreaX Down
13879	CCT5	ENSTGUG00000007632	Ax Down
7818	CCT6B	ENSTGUG00000005105
12463	CCT8	ENSTGUG00000013587	Ax Down					1
1111	CCZ1	ENSTGUG00000008740	Ax Up					1
12306	CD101	ENSTGUG00000013516
12491	CD109	ENSTGUG00000012659
13644	CD14	ENSTGUG00000001596
9340	CD151	ENSTGUG00000009760	Ra Up				RA Up
13920	CD164	ENSTGUG00000012105			LMAN Up			1
12304	CD2	ENSTGUG00000013514
12277	CD200
4554	CD247	ENSTGUG00000013507
12122	CD274	ENSTGUG00000005033
6762	CD276
9958	CD28
12832	CD2AP	ENSTGUG00000013213				AreaX Up	RA Down
14373	CD36	ENSTGUG00000002619
11945	CD38	ENSTGUG00000009764	Ra Up			RA Up	RA Up	1
9520	CD3D	ENSTGUG00000000240
2349	CD3E
13881	CD4	ENSTGUG00000013304					AreaX Up
6530	CD40	ENSTGUG00000005824				HVC Up
9178	CD40LG	ENSTGUG00000002108
9664	CD44	ENSTGUG00000010085			LMAN Up
14628	CD59	ENSTGUG00000005592	Ax Up	AreaX Up,HVC Up,LMAN Up	HVC Up,LMAN Up	AreaX Up	AreaX Up
14282	CD81	ENSTGUG00000009259			LMAN Down
9727	CD82	ENSTGUG00000010270	Ax Down	HVC Up,LMAN Up	LMAN Up	AreaX Down,LMAN Up
13897	CD86	ENSTGUG00000013349							1						1			1						1
13359	CD8B	ENSTGUG00000010847
5218	CD9	ENSTGUG00000011899		HVC Up			RA Up
14637	CD99	ENSTGUG00000010749
4992	CDADC1	ENSTGUG00000012166			LMAN Up
10141	CDAN1	ENSTGUG00000011143
11812	CDC123	ENSTGUG00000002204
8760	CDC14A	ENSTGUG00000005078	Ax Up			AreaX Up	AreaX Up
3862	CDC14B	ENSTGUG00000000501			LMAN Down
12874	CDC16	ENSTGUG00000009440
10454	CDC20	ENSTGUG00000007159
2410	CDC23	ENSTGUG00000000037				AreaX Up
8653	CDC25A	ENSTGUG00000000097			LMAN Up
7242	CDC27	ENSTGUG00000001915
11927	CDC37L1	ENSTGUG00000005189						1
1522	CDC42	ENSTGUG00000017253	Ax Down					1
10657	CDC42EP3	ENSTGUG00000008820		HVC Down	HVC Down,LMAN Down		RA Down
13095	CDC42SE2	ENSTGUG00000000400	Ax Down					1
7524	CDC45	ENSTGUG00000008459
12822	CDC5L	ENSTGUG00000013251
1918	CDC7	ENSTGUG00000006148
7166	CDCA2
11089	CDCA4	ENSTGUG00000012917
3352	CDCA7	ENSTGUG00000008676							1						1
14017	CDCA7L	ENSTGUG00000002689	HVC_RA Up	AreaX Up,HVC Up		HVC Up
13259	CDCP1	ENSTGUG00000004994					RA Down
8774	CDH11	ENSTGUG00000009849		AreaX Down				1
6528	CDH13	ENSTGUG00000004357			HVC Down
12507	CDH17	ENSTGUG00000011871					RA Down
4476	CDH2	ENSTGUG00000010620	Ax Down	AreaX Down,HVC Down
1631	CDH4	ENSTGUG00000007909	HVC LMAN Up	AreaX Down,HVC Down	HVC Down	LMAN Up	RA Down
13251	CDH6	ENSTGUG00000001940	Ra Down	HVC Up				1
7772	CDHR1	ENSTGUG00000006019	Ra Up	RA Up
1044	CDHR2	ENSTGUG00000000517				AreaX Down
2582	CDHR3	ENSTGUG00000003012
8692	CDHR5	ENSTGUG00000007156
570	CDK12	ENSTGUG00000002209
11314	CDK13	ENSTGUG00000001850	Ax Up			AreaX Up
11000	CDK17	ENSTGUG00000008629	Ra Down	AreaX Down,HVC Down	LMAN Down	AreaX Up	RA Down
207	CDK18	ENSTGUG00000017502					AreaX Down
8112	CDK2AP1	ENSTGUG00000005436		HVC Up	HVC Up,LMAN Up	AreaX Down	RA Up
2127	CDK5RAP1	ENSTGUG00000006328
10261	CDK6	ENSTGUG00000001495	Ax Up	AreaX Up	AreaX Up,HVC Up,LMAN Down	AreaX Up	AreaX Up	1
1611	CDK9	ENSTGUG00000003597
11306	CDKL1	ENSTGUG00000013175		HVC Up		RA Up	RA Up
12767	CDKL5	ENSTGUG00000007769	Ra Down	RA Down	LMAN Down	AreaX Up,RA Down	AreaX Up
11279	CDKN3	ENSTGUG00000013094
745	CDO1	ENSTGUG00000017540	Ax Down		AreaX Down,HVC Up,LMAN Down,RA Up	AreaX Down	AreaX Down
4234	CDPF1	ENSTGUG00000011794
9654	CDR2L	ENSTGUG00000008790		AreaX Up,HVC Up	LMAN Up
10923	CDS1	ENSTGUG00000002118			LMAN Up,RA Up		RA Up
7147	CDS2	ENSTGUG00000004008		HVC Down
11098	CDV3	ENSTGUG00000004497			LMAN Up
2425	CDX4	ENSTGUG00000005699
11474	CDYL	ENSTGUG00000002246	Ax Down					1
3951	CDYL2	ENSTGUG00000004589
8633	CEBPG	ENSTGUG00000009474						1
9745	CELF1	ENSTGUG00000010377			LMAN Down	AreaX Up
7804	CELF4	ENSTGUG00000001649		AreaX Down,HVC Down	HVC Down,LMAN Down	AreaX Up	RA Down
9177	CEMIP	ENSTGUG00000007966			LMAN Down	AreaX Up		1
12169	CEMIP2	ENSTGUG00000000841
8727	CEND1	ENSTGUG00000007814			LMAN Up	LMAN Up	RA Up
14002	CENPC1	ENSTGUG00000004549						1
6837	CENPI	ENSTGUG00000006715
3657	CENPM	ENSTGUG00000009767				AreaX Up	AreaX Up
11662	CENPN	ENSTGUG00000004579
12817	CENPQ	ENSTGUG00000013258
14633	CENPS	ENSTGUG00000003298
7505	CENPT	ENSTGUG00000005260					RA Down
13376	CENPU	ENSTGUG00000006711
8503	CENPV	ENSTGUG00000006811				AreaX Down
308	CEP104	ENSTGUG00000002728
1265	CEP112	ENSTGUG00000004216		AreaX Down			AreaX Up
8804	CEP120	ENSTGUG00000001104				AreaX Up
13965	CEP135	ENSTGUG00000007448	Ax Up		LMAN Down	AreaX Up	AreaX Up
1784	CEP152
4650	CEP162	ENSTGUG00000012509	Ra Down			AreaX Up		1
10733	CEP170	ENSTGUG00000008164
11068	CEP170B	ENSTGUG00000012907			LMAN Down
9173	CEP19	ENSTGUG00000005868
3446	CEP290	ENSTGUG00000007963	Ax Up	LMAN Down	LMAN Down	AreaX Up	AreaX Up
8300	CEP350	ENSTGUG00000017377						1										1			1
2581	CEP41	ENSTGUG00000001919			LMAN Down			1
5419	CEP44	ENSTGUG00000006297
2097	CEP55	ENSTGUG00000008779						1
5056	CEP57	ENSTGUG00000012809
4513	CEP57L1	ENSTGUG00000012107	Ax Up			AreaX Up
2092	CEP63	ENSTGUG00000006904
11226	CEP70
11756	CEP76	ENSTGUG00000009580
12186	CEP78	ENSTGUG00000003403	Ax Up			AreaX Up
13206	CEP83	ENSTGUG00000008314	Ax Up		AreaX Up	AreaX Up
158	CEP85	ENSTGUG00000001041
1515	CEP89	ENSTGUG00000009207				AreaX Up
1135	CEP95	ENSTGUG00000004601	Ax Ra Up			AreaX Up
4530	CEP97	ENSTGUG00000013617				AreaX Up
30	CEPT1
8827	CER1	ENSTGUG00000004618																1	1		1	1
13216	CERK	ENSTGUG00000003773	Ax Down	AreaX Up	AreaX Up,HVC Up,LMAN Up
10045	CERKL	ENSTGUG00000009459			LMAN Down	AreaX Down	AreaX Down
11964	CERS3	ENSTGUG00000008811
1955	CERS5	ENSTGUG00000003577	Ax Up			AreaX Up	AreaX Up	1
9546	CETN2	ENSTGUG00000005489	Ax Up		LMAN Down,RA Down			1
4347	CETN3	ENSTGUG00000000683
7413	CETP	ENSTGUG00000005087
13565	CFAP161	ENSTGUG00000007939				AreaX Up
285	CFAP20	ENSTGUG00000004759			LMAN Up	AreaX Down
12483	CFAP298	ENSTGUG00000013444
5053	CFAP300	ENSTGUG00000012760						1
9735	CFAP36	ENSTGUG00000006976
2068	CFAP410	ENSTGUG00000006764
12168	CFAP44	ENSTGUG00000013415			LMAN Down	AreaX Up	RA Down											1	1	1				1	1	1
10426	CFAP57	ENSTGUG00000007089
2677	CFAP58	ENSTGUG00000010439					RA Up											1	1	1	1			1	1	1
3500	CFAP65	ENSTGUG00000005692
2862	CFAP69
812	CFAP70	ENSTGUG00000003681				AreaX Up	AreaX Up,RA Down		1						1			1						1
12406	CFAP99	ENSTGUG00000010519
11413	CFC1	ENSTGUG00000000498
3118	CFL2	ENSTGUG00000011931	Ax Down	HVC Up,LMAN Up	HVC Up,LMAN Up	AreaX Down	RA Up	1
2622	CFLAR	ENSTGUG00000010309							1	1					1	1
2943	CFTR	ENSTGUG00000004828		AreaX Up,HVC Up	AreaX Up,HVC Up
13893	CGA	ENSTGUG00000012470
4674	CGAS	ENSTGUG00000012683				AreaX Up	AreaX Up
12279	CGGBP1	ENSTGUG00000013487			LMAN Down	AreaX Up
6555	CGNL1	ENSTGUG00000006242
11271	CGRRF1	ENSTGUG00000013088
9156	CH25H	ENSTGUG00000008317		HVC Up,LMAN Up,RA Up	HVC Up,LMAN Up	AreaX Down
9782	CHAC2	ENSTGUG00000007286				AreaX Down	AreaX Down
13282	CHAD	ENSTGUG00000008987
7380	CHAF1A	ENSTGUG00000000819	Ax Up															1						1
12551	CHAF1B	ENSTGUG00000004832
12873	CHAMP1	ENSTGUG00000009515
7763	CHAT	ENSTGUG00000005959				AreaX Up	AreaX Up
13656	CHCHD2	ENSTGUG00000005194			LMAN Up	AreaX Down
2003	CHCHD4	ENSTGUG00000008273						1
4458	CHD1L	ENSTGUG00000013392	Ra Up
9367	CHD2	ENSTGUG00000008540	Ax Up		LMAN Down	AreaX Up	AreaX Up	1
11930	CHD4	ENSTGUG00000013329
12310	CHD7	ENSTGUG00000011196			LMAN Up		RA Up
1705	CHDH	ENSTGUG00000006933
8915	CHEK2	ENSTGUG00000007849
8249	CHERP	ENSTGUG00000000680	Ax Up		LMAN Down		RA Down	1
7724	CHFR	ENSTGUG00000008181						1
2893	CHGB	ENSTGUG00000002191	Ax Down	AreaX Down,HVC Up,LMAN Down	HVC Up,LMAN Down	AreaX Down,HVC Up	AreaX Down	1	1						1
2427	CHIC1	ENSTGUG00000005706				AreaX Up
2184	CHKA	ENSTGUG00000009915	Ax Up		LMAN Up		AreaX Up
9681	CHL1	ENSTGUG00000009997	Ra Up				RA Up
12322	CHMP2B	ENSTGUG00000013532
12455	CHMP3	ENSTGUG00000010820
678	CHMP4B	ENSTGUG00000003739
11581	CHMP5	ENSTGUG00000008197
13287	CHMP6	ENSTGUG00000003019
2930	CHN1	ENSTGUG00000008848	Ra Down		LMAN Down	AreaX Up
3441	CHN2				AreaX Up,LMAN Up	AreaX Up
4619	CHODL	ENSTGUG00000013550			HVC Down
13030	CHORDC1	ENSTGUG00000012877						1
13416	CHP1	ENSTGUG00000010812	Ax Up
10934	CHPF	ENSTGUG00000006191			LMAN Up
3895	CHPT1	ENSTGUG00000011346	Ax Down		HVC Up
9738	CHRDL1	ENSTGUG00000004370			HVC Up
5084	CHRDL2	ENSTGUG00000013452		HVC Up,LMAN Up	HVC Up,LMAN Up,RA Up	AreaX Down
11502	CHRM2	ENSTGUG00000011545			LMAN Down
10753	CHRM3	ENSTGUG00000010589		HVC Down,RA Down	HVC Down,LMAN Down		AreaX Down
2660	CHRM4	ENSTGUG00000010635		AreaX Up	LMAN Down	AreaX Up,LMAN Down	AreaX Up
3025	CHRM5	ENSTGUG00000011652			LMAN Down,RA Down	HVC Up	AreaX Down
10191	CHRNA1	ENSTGUG00000008827			LMAN Down
6237	CHRNA6	ENSTGUG00000000216
8345	CHRNA7	ENSTGUG00000005850	HVC LMAN Up	HVC Up
11886	CHRNA9	ENSTGUG00000008712
12270	CHRNB3	ENSTGUG00000000227		AreaX Up
2511	CHRNG	ENSTGUG00000009924			LMAN Up
9872	CHST1	ENSTGUG00000010745	HVC_RA Up	AreaX Down,HVC Down,LMAN Down	AreaX Down,LMAN Down	LMAN Down	AreaX Up	1
12855	CHST10	ENSTGUG00000010047		HVC Up
13198	CHST11	ENSTGUG00000011133		HVC Down	HVC Down			1
8419	CHST12	ENSTGUG00000008138						1
10356	CHST15	ENSTGUG00000011423		HVC Down	LMAN Down		AreaX Down
7316	CHST4	ENSTGUG00000008391
7322	CHST6	ENSTGUG00000008470
1567	CHST8	ENSTGUG00000009505				AreaX Down	AreaX Down,RA Up
1036	CHUK
1047	CHUK	ENSTGUG00000004649	Ax Up
2602	CIAO2A	ENSTGUG00000009827						1
1637	CIAO2B	ENSTGUG00000009680				AreaX Down
8802	CIAO3	ENSTGUG00000006791
7399	CIAPIN1	ENSTGUG00000005036		LMAN Up	LMAN Up
8075	CIB2	ENSTGUG00000003241			AreaX Up,HVC Up,LMAN Up		RA Up
13652	CIB3	ENSTGUG00000000714
7115	CIDEA	ENSTGUG00000009653
2269	CIITA	ENSTGUG00000004838			LMAN Down
9506	CILP	ENSTGUG00000009096
10975	CINP	ENSTGUG00000012815	Ax Down
10608	CIPC	ENSTGUG00000012273
7899	CISD1	ENSTGUG00000005145	HVC LMAN Up			AreaX Down	AreaX Down,RA Up	1
3775	CISD2	ENSTGUG00000003707
2328	CIT	ENSTGUG00000009264	Ax Up	AreaX Up	LMAN Down	AreaX Up		1
14598	CITED4	ENSTGUG00000000843
13608	CIZ1	ENSTGUG00000003828
12950	CKAP2	ENSTGUG00000012041	Ax Up		HVC Down,LMAN Down	AreaX Up	AreaX Up,RA Down	1
3871	CKAP4	ENSTGUG00000011066	Ax Up
2645	CKAP5	ENSTGUG00000010577	LMAN Up, Ra Down		RA Down
11019	CKB	ENSTGUG00000012861		AreaX Up,LMAN Up	LMAN Up,RA Down	HVC Down
10718	CKS2	ENSTGUG00000000446
11088	CLBA1	ENSTGUG00000012915							1						1
7694	CLCC1	ENSTGUG00000004508
4364	CLCN1	ENSTGUG00000013222
3033	CLCN3	ENSTGUG00000006161				AreaX Up
12791	CLCN4	ENSTGUG00000008365
2290	CLCN5	ENSTGUG00000005324	Ax Down
1452	CLCN6	ENSTGUG00000002366	Ax Down
2396	CLCN7	ENSTGUG00000004211			RA Up
2306	CLDN1	ENSTGUG00000009337			HVC Down
10090	CLDN12	ENSTGUG00000001432				AreaX Up
12552	CLDN14	ENSTGUG00000004853
9474	CLDN16	ENSTGUG00000009324
9247	CLDN18	ENSTGUG00000006831
11692	CLDN20	ENSTGUG00000011141
13180	CLDND1	ENSTGUG00000013412	Ax Down
2267	CLEC16A	ENSTGUG00000004849				AreaX Up												1	1		1	1
13512	CLEC19A	ENSTGUG00000009447
11601	CLEC3A	ENSTGUG00000009128
3641	CLEC3B	ENSTGUG00000004984			LMAN Down		RA Up
7422	CLIC4	ENSTGUG00000001132			LMAN Up	RA Up	RA Up	1
13293	CLIC5	ENSTGUG00000013246
12542	CLIC6
8210	CLINT1	ENSTGUG00000000611
8490	CLIP1	ENSTGUG00000006241
2861	CLIP4	ENSTGUG00000005446	Ax Up	AreaX Up		AreaX Up	AreaX Up
446	CLK3
9053	CLK4	ENSTGUG00000001155	Ax Up		LMAN Down	AreaX Up		1
10858	CLMN	ENSTGUG00000012669			AreaX Up,RA Down	AreaX Up
2061	CLMP	ENSTGUG00000000496
4965	CLN5	ENSTGUG00000012549
5366	CLN8	ENSTGUG00000012928			LMAN Up
4001	CLPTM1L	ENSTGUG00000008431						1
14122	CLPX	ENSTGUG00000009033				AreaX Up
10604	CLRN1	ENSTGUG00000011365				AreaX Down
740	CLSPN	ENSTGUG00000001651																1			1
6747	CLSTN1	ENSTGUG00000003610					AreaX Down
1689	CLSTN2	ENSTGUG00000005091		HVC Up	HVC Up,RA Down	RA Down	RA Down											1						1
4357	CLSTN3	ENSTGUG00000013253	Ax Down	AreaX Down	LMAN Up	AreaX Down	AreaX Down
4527	CLTA	ENSTGUG00000000114	Ax Down	HVC Up	HVC Up
8086	CLTB	ENSTGUG00000000535	Ax Down		LMAN Up
8723	CLTC	ENSTGUG00000007540
7431	CLTCL1	ENSTGUG00000008809	Ax Down	AreaX Down
4042	CLUAP1	ENSTGUG00000003841						1
1850	CLUH	ENSTGUG00000008810			LMAN Up			1
12068	CLUL1	ENSTGUG00000010187			LMAN Up	LMAN Up			1						1
12898	CLYBL	ENSTGUG00000010925		HVC Up	HVC Up,LMAN Up	AreaX Down	RA Up
11604	CMAS	ENSTGUG00000012063
10988	CMC1	ENSTGUG00000003560					RA Up
13100	CMC2	ENSTGUG00000004587
14465	CMC4	ENSTGUG00000006936			LMAN Up
11196	CMIP	ENSTGUG00000004472	Ax Down	HVC Down		AreaX Down	AreaX Down
8688	CMKLR1	ENSTGUG00000007080
10639	CMPK1	ENSTGUG00000008563	Ax Down		LMAN Up
4805	CMPK2	ENSTGUG00000012989				LMAN Up
12225	CMSS1	ENSTGUG00000013635
3535	CMTM8	ENSTGUG00000003684
10516	CMTR1	ENSTGUG00000007924
7787	CMTR2	ENSTGUG00000006002
13761	CNBP	ENSTGUG00000004001
4112	CNDP1	ENSTGUG00000009132
4111	CNDP2	ENSTGUG00000009147	Ax Up		LMAN Up		AreaX Up	1
13579	CNEP1R1	ENSTGUG00000008609
4211	CNGA1	ENSTGUG00000008154
9478	CNGA2	ENSTGUG00000006426
12846	CNGA3	ENSTGUG00000010272	Ax Up	AreaX Down	HVC Up,LMAN Down	AreaX Up,RA Down	AreaX Up
316	CNGB1	ENSTGUG00000004800		AreaX Down,HVC Down	HVC Down,LMAN Down		RA Down
6008	CNGB3	ENSTGUG00000011777
11275	CNIH1	ENSTGUG00000013093						1
5396	CNIH4	ENSTGUG00000004053
11687	CNKSR3	ENSTGUG00000011168		AreaX Up,HVC Up,LMAN Up	AreaX Up,LMAN Up		RA Up
12924	CNMD	ENSTGUG00000012448
14434	CNOT1	ENSTGUG00000005919						1
11015	CNOT10	ENSTGUG00000003749
4916	CNOT11	ENSTGUG00000009952
10484	CNOT2	ENSTGUG00000007018			LMAN Down	AreaX Up
11084	CNOT4	ENSTGUG00000009161
9042	CNOT6	ENSTGUG00000001119	Ax Up		LMAN Down	AreaX Up	RA Down
10587	CNOT6L	ENSTGUG00000001737				AreaX Up
11693	CNOT7	ENSTGUG00000007253						1
8299	CNOT8	ENSTGUG00000000699
3514	CNOT9	ENSTGUG00000005493						1
8125	CNP	ENSTGUG00000002478	Ra Up	AreaX Up,HVC Up,LMAN Up	AreaX Up,LMAN Up		RA Up
10965	CNPPD1	ENSTGUG00000005725
13895	CNR1	ENSTGUG00000012436	Ax Down	RA Down	LMAN Down		AreaX Down
8356	CNR2	ENSTGUG00000001188
9996	CNRIP1	ENSTGUG00000002376	Ax Down	AreaX Down,HVC Down	LMAN Down
10698	CNST	ENSTGUG00000008403			AreaX Up,LMAN Down	AreaX Up
941	CNTD1	ENSTGUG00000002781				AreaX Up		1
5483	CNTLN
196	CNTN2	ENSTGUG00000017494			LMAN Up,RA Up
6310	COA7	ENSTGUG00000009061
3414	COBLL1	ENSTGUG00000007022
3086	COCH	ENSTGUG00000011834	Ra Up	LMAN Up	LMAN Up
8473	COG1	ENSTGUG00000002888
3428	COG2	ENSTGUG00000009965				AreaX Up
4982	COG3	ENSTGUG00000012310				AreaX Up
7862	COG4	ENSTGUG00000006122	Ra Up
12958	COG6	ENSTGUG00000011994		AreaX Up,HVC Up	LMAN Up		RA Up
1944	COG7	ENSTGUG00000005968
1009	COIL	ENSTGUG00000009544	Ax Up
2644	COL17A1	ENSTGUG00000010406
10334	COL1A2	ENSTGUG00000001522	Ra Up			RA Up	RA Up	1
8954	COL20A1	ENSTGUG00000007458
7567	COL26A1	ENSTGUG00000004358			LMAN Up		RA Down
2197	COL27A1				HVC Down,LMAN Down
6660	COL6A1	ENSTGUG00000003341		HVC Up	HVC Up,LMAN Up	AreaX Down
1939	COL6A2	ENSTGUG00000003386
8289	COL6A3	ENSTGUG00000003667	HVC_RA Up				RA Up	1	1	1	1				1	1	1
12580	COLEC10	ENSTGUG00000012342
12701	COLEC11	ENSTGUG00000012984				AreaX Up	AreaX Up
5290	COLEC12	ENSTGUG00000010195
10913	COLQ	ENSTGUG00000003015			LMAN Up		RA Up
2825	COMMD1	ENSTGUG00000002215
5498	COMMD2	ENSTGUG00000011415
10035	COMMD5	ENSTGUG00000003286
12916	COMMD6	ENSTGUG00000012533
9259	COMMD7	ENSTGUG00000006445
11858	COMMD8	ENSTGUG00000008291
1043	COMP				HVC Up		HVC Down
7667	COMT	ENSTGUG00000008341	Ax Down
8673	COMTD1	ENSTGUG00000006565			LMAN Up,RA Up	HVC Down
2892	COPA				RA Up
9040	COPB1	ENSTGUG00000008435
1703	COPB2	ENSTGUG00000005180				AreaX Up
1005	COPE	ENSTGUG00000014053			LMAN Up	AreaX Down		1
8980	COPG1	ENSTGUG00000007768
14204	COPS2	ENSTGUG00000007288			LMAN Up
8627	COPS3	ENSTGUG00000007378	Ax Down
3435	COPS4	ENSTGUG00000002775	Ax Down
4295	COPS7A	ENSTGUG00000013312			LMAN Up			1
2454	COPS7B	ENSTGUG00000009815
8295	COPS8	ENSTGUG00000003647
2561	COQ10B	ENSTGUG00000010549
10911	COQ2	ENSTGUG00000002188	Ra Up
4564	COQ3	ENSTGUG00000012290
1575	COQ4	ENSTGUG00000003696				AreaX Down
14104	COQ5	ENSTGUG00000009568	Ax Up
3172	COQ6	ENSTGUG00000012085
9344	COQ7	ENSTGUG00000009425
10116	COQ8A	ENSTGUG00000004345		HVC Up				1
7395	COQ9	ENSTGUG00000005018
11864	CORO1C	ENSTGUG00000006956	Ra Down	RA Down
7630	CORO2A	ENSTGUG00000001408		AreaX Down	HVC Down,LMAN Down
5131	COTL1	ENSTGUG00000004261	Ax Down	AreaX Down		AreaX Down,RA Up	AreaX Down,RA Up
953	COX11	ENSTGUG00000009463
2364	COX15	ENSTGUG00000009368
13410	COX16	ENSTGUG00000011393
14015	COX18	ENSTGUG00000001591
10714	COX20	ENSTGUG00000008299
6505	COX4I1	ENSTGUG00000004109
11834	COX5A	ENSTGUG00000003898
9450	COX6A1	ENSTGUG00000009540	Ax Up		LMAN Up
13227	COX6C	ENSTGUG00000012043			LMAN Up
10435	COX7A2L	ENSTGUG00000003431	Ax Up					1
9668	COX7B	ENSTGUG00000005979
12380	COX7C	ENSTGUG00000006814		HVC Up	HVC Up,LMAN Up		RA Up
10625	CP	ENSTGUG00000011435		LMAN Down		AreaX Up
12352	CPA6	ENSTGUG00000011388			RA Down
1200	CPAMD8	ENSTGUG00000000470
9332	CPB1	ENSTGUG00000008845
3008	CPE	ENSTGUG00000005938	Ax Down	HVC Down	LMAN Down		AreaX Down
7712	CPEB1	ENSTGUG00000004564					AreaX Up
4310	CPEB2	ENSTGUG00000009822				RA Down
9355	CPEB3	ENSTGUG00000008988	Ax Down
1166	CPLANE1	ENSTGUG00000002059
3097	CPM	ENSTGUG00000006875			HVC Up,LMAN Up		RA Up	1
2243	CPN1	ENSTGUG00000009169		AreaX Down,HVC Up,RA Down	AreaX Down,LMAN Down	LMAN Down	AreaX Up
4662	CPNE3	ENSTGUG00000011769						1
9891	CPO	ENSTGUG00000010012
12210	CPOX	ENSTGUG00000013439
926	CPPED1	ENSTGUG00000005075
10756	CPSF2	ENSTGUG00000012571				AreaX Up
12716	CPSF3	ENSTGUG00000013016
8582	CPSF4	ENSTGUG00000007552						1
3100	CPSF6	ENSTGUG00000006884	Ax Up			AreaX Up	AreaX Up
9402	CPT1A				LMAN Up	LMAN Up	RA Up
10349	CPXM2	ENSTGUG00000011397
1024	CRABP1	ENSTGUG00000003323	Ax Up	AreaX Up	AreaX Up	AreaX Up
13418	CRACR2B	ENSTGUG00000009781					HVC Up,RA Down
10954	CRADD	ENSTGUG00000008284	Ax Up
10203	CRAMP1	ENSTGUG00000003176	Ax Up			AreaX Up
7761	CRB1	ENSTGUG00000004300
9812	CRBN	ENSTGUG00000010200
13654	CRCP	ENSTGUG00000005354
13501	CREB1	ENSTGUG00000010023			LMAN Down			1
2669	CREB3L1	ENSTGUG00000010669			HVC Down
11498	CREB3L2	ENSTGUG00000011582	Ra Down		LMAN Down		RA Down
9637	CREBBP	ENSTGUG00000003971	Ax Up			AreaX Up		1
908	CREBRF	ENSTGUG00000000314			LMAN Down	AreaX Up		1
13847	CREG1	ENSTGUG00000013506	Ax Down		LMAN Up		RA Up
2719	CRELD2	ENSTGUG00000003874						1
9403	CREM	ENSTGUG00000000919
12103	CRHBP	ENSTGUG00000004054	Ax Down	LMAN Down	HVC Up	AreaX Down,HVC Up	AreaX Down,RA Up	1
7192	CRHR1	ENSTGUG00000003182	Ax Up
10467	CRIPT	ENSTGUG00000003989						1
12391	CRISPLD1	ENSTGUG00000011579		AreaX Down		AreaX Up,LMAN Down	AreaX Up
8914	CRISPLD2	ENSTGUG00000004192
7886	CRK	ENSTGUG00000005424
2027	CRKL						AreaX Down
12819	CRLF2	ENSTGUG00000010698
8069	CRLF3	ENSTGUG00000004958
2906	CRLS1	ENSTGUG00000002210
12125	CRMP1	ENSTGUG00000010001		AreaX Down	LMAN Down
2682	CRNKL1	ENSTGUG00000007645	Ax Up			AreaX Up
2782	CROT	ENSTGUG00000001370
9224	CRTAM	ENSTGUG00000000481	Ax Up
1054	CRTC1	ENSTGUG00000001067	Ax Up			AreaX Up	AreaX Up	1
6217	CRY1	ENSTGUG00000010999	Ax Up	HVC Down	LMAN Down	AreaX Up	RA Down	1
6343	CRY2	ENSTGUG00000010722
12619	CRYAA	ENSTGUG00000005872	Ax Down					1
9692	CRYAB	ENSTGUG00000000320	Ra Up	AreaX Up,HVC Up,LMAN Up,RA Up	HVC Up,LMAN Up		RA Up
13913	CRYBG1	ENSTGUG00000012192		HVC Up	HVC Up	HVC Up
781	CRYM	ENSTGUG00000009095	Ax Down					1
10971	CRYZ	ENSTGUG00000010402
12529	CRYZL1	ENSTGUG00000000494						1
14424	CSDE1	ENSTGUG00000000972
8580	CSE1L	ENSTGUG00000008823
1814	CSF1R	ENSTGUG00000000965
12818	CSF2RA	ENSTGUG00000018323
10511	CSGALNACT1	ENSTGUG00000004359					RA Up
14575	CSNK1A1	ENSTGUG00000000243
14225	CSNK1D	ENSTGUG00000003904
13202	CSNK1E	ENSTGUG00000010414						1
7755	CSNK1G1	ENSTGUG00000004638	Ax Up			AreaX Up	AreaX Up
9100	CSNK2A1	ENSTGUG00000006741
7311	CSNK2A2	ENSTGUG00000004713	Ax Down		RA Up	AreaX Down
9043	CSRNP1	ENSTGUG00000000458				AreaX Up	AreaX Up
10820	CSRNP3	ENSTGUG00000007262
14546	CSRP1	ENSTGUG00000001313			AreaX Down
3197	CSRP2	ENSTGUG00000007494	Ra Up				RA Up
8326	CSRP3	ENSTGUG00000015869
2745	CST7	ENSTGUG00000006040
11917	CSTA	ENSTGUG00000013346
11916	CSTB	ENSTGUG00000013347		HVC Up	LMAN Up
9634	CSTF1	ENSTGUG00000008448
3594	CSTF3	ENSTGUG00000005010	Ax Up					1
12419	CTBP1	ENSTGUG00000010662			LMAN Down			1
9589	CTBPL	ENSTGUG00000000022
2771	CTBS	ENSTGUG00000006581
12039	CTC1	ENSTGUG00000013368						1
596	CTCF	ENSTGUG00000005603						1
11422	CTDP1	ENSTGUG00000006649	Ax Up			AreaX Up
8923	CTDSPL	ENSTGUG00000000374	Ax Up		LMAN Down	AreaX Up	AreaX Up
9785	CTDSPL2	ENSTGUG00000009887			LMAN Down	AreaX Up	AreaX Up
3489	CTH	ENSTGUG00000010266
12565	CTHRC1	ENSTGUG00000012148			LMAN Up	AreaX Down
2747	CTLA4	ENSTGUG00000009756
4005	CTNNAL1	ENSTGUG00000008579	Ax Down
3653	CTNNB1	ENSTGUG00000004786	Ax Up	HVC Down	LMAN Down	AreaX Up
7864	CTNNBIP1	ENSTGUG00000003606				AreaX Down	AreaX Down
2153	CTNNBL1	ENSTGUG00000006202	Ax Down				RA Up
4305	CTNND2				LMAN Down
1465	CTNS	ENSTGUG00000006919
8887	CTR9	ENSTGUG00000007907				AreaX Up
13826	CTSB	ENSTGUG00000013291	Ax Down	LMAN Up	LMAN Up	AreaX Down
9255	CTSD	ENSTGUG00000009428	Ax Down	LMAN Up	LMAN Up	AreaX Down,LMAN Up
10471	CTSEAL	ENSTGUG00000006960
9805	CTSH	ENSTGUG00000009976						1
2958	CTSO	ENSTGUG00000005432				RA Up
3857	CTSV	ENSTGUG00000000598	Ax Down	HVC Up,LMAN Up,RA Up
2363	CTSZ	ENSTGUG00000008040
9611	CTTN	ENSTGUG00000005520	Ra Down			AreaX Up	AreaX Up
10136	CTTNBP2	ENSTGUG00000004732	Ax Down	AreaX Down,RA Down	LMAN Down
492	CTTNBP2NL	ENSTGUG00000017548
1798	CUEDC2	ENSTGUG00000007606
11341	CUL1	ENSTGUG00000001790
9405	CUL2	ENSTGUG00000000924
8707	CUL3	ENSTGUG00000007980		AreaX Up			AreaX Down
4934	CUL4A	ENSTGUG00000009155
9910	CUL4B	ENSTGUG00000003508						1
13005	CUL5	ENSTGUG00000012650			AreaX Up	RA Down
7527	CUTA
2351	CUTC	ENSTGUG00000009354			AreaX Down	AreaX Down
13019	CWC15	ENSTGUG00000012817
10074	CWC22	ENSTGUG00000009340			LMAN Down	AreaX Up
527	CWC25	ENSTGUG00000003011
11820	CWH43	ENSTGUG00000007956
13174	CXADR	ENSTGUG00000013547			HVC Down,LMAN Down
9126	CXCL12	ENSTGUG00000008242	Ax Up			AreaX Up
2009	CXCL14				HVC Up	HVC Up	AreaX Down
11325	CXCR4	ENSTGUG00000011822			LMAN Up
12649	CXorf21	ENSTGUG00000007075							1						1
4771	CXorf22	ENSTGUG00000006861
2742	CXorf56	ENSTGUG00000003329						1
7309	CXXC5	ENSTGUG00000001608	Ax Down			AreaX Down	AreaX Down
11708	CYB5A	ENSTGUG00000009166	Ax Down
1681	CYB5R2	ENSTGUG00000005192
4208	CYB5R3	ENSTGUG00000012143
10746	CYB5RL	ENSTGUG00000009400
12641	CYBB	ENSTGUG00000006788
7521	CYBC1	ENSTGUG00000007675
10302	CYBRD1	ENSTGUG00000008221
6244	CYCS	ENSTGUG00000002866	Ax Up	AreaX Up,HVC Up	LMAN Up		RA Up	1
4906	CYFIP1	ENSTGUG00000010510				AreaX Up
8247	CYFIP2	ENSTGUG00000000637	Ra Down		LMAN Down	RA Down
617	CYGB	ENSTGUG00000007852	LMAN Up, Ra Down	HVC Down	HVC Down,LMAN Down,RA Down			1
10433	CYLD	ENSTGUG00000007517
14231	CYP19A1	ENSTGUG00000006993		AreaX Down,HVC Down	HVC Down,LMAN Down		RA Down
2759	CYP20A1	ENSTGUG00000009709	Ax Up
9296	CYP26A1	ENSTGUG00000008850
3548	CYP27C1	ENSTGUG00000004904
9817	CYP2AB1	ENSTGUG00000009991
9748	CYP2AB5	ENSTGUG00000009970
12816	CYP2AC1	ENSTGUG00000013260
11158	CYP2D6	ENSTGUG00000009674
9049	CYP2R1	ENSTGUG00000008492		LMAN Up
3274	CYP2U1	ENSTGUG00000003983
8285	CYP2W1	ENSTGUG00000008352
8481	CYP3A5	ENSTGUG00000007790
10897	CYP46A1	ENSTGUG00000012724
2952	CYP51A1	ENSTGUG00000001451
12293	CYP7A1	ENSTGUG00000011128
12328	CYP7B1	ENSTGUG00000011247
12940	CYSLTR2	ENSTGUG00000012197
11361	CYTH4	ENSTGUG00000010616			LMAN Down
12114	CYTL1	ENSTGUG00000009949
5159	CZH18orf32	ENSTGUG00000000043
3314	CZIB	ENSTGUG00000009181
2010	D2HGDH	ENSTGUG00000005907
13458	DAB1	ENSTGUG00000009639	Ra Up	AreaX Up	AreaX Up
464	DAB2IP	ENSTGUG00000006752
3472	DACT2	ENSTGUG00000009658	LMAN Up, Ra Down	HVC Down	HVC Down,LMAN Down	RA Down	RA Down
11621	DAGLA	ENSTGUG00000006570	Ax Up			RA Down		1
6723	DAGLB	ENSTGUG00000008882		AreaX Down	LMAN Down
8656	DAO	ENSTGUG00000007011					RA Up
11537	DAP	ENSTGUG00000007567						1
4340	DAP3	ENSTGUG00000017418				AreaX Down
1066	DAPK2	ENSTGUG00000003221			LMAN Up	LMAN Up
7122	DAPP1	ENSTGUG00000003467		HVC Up	HVC Up	HVC Up
3789	DARS	ENSTGUG00000011810	Ax Up
8182	DARS2	ENSTGUG00000017335	Ax Up				AreaX Up	1
12198	DAZAP1	ENSTGUG00000000869
3460	DAZL	ENSTGUG00000003145
2838	DBF4	ENSTGUG00000001396		AreaX Up	AreaX Up	AreaX Up
925	DBH	ENSTGUG00000005640
8288	DBNDD2	ENSTGUG00000005004		HVC Up,RA Up	LMAN Up
382	DBR1	ENSTGUG00000007073
1674	DBT	ENSTGUG00000005200						1
8304	DBX1	ENSTGUG00000015791
14187	DBX2	ENSTGUG00000006020	Ra Up	AreaX Up	LMAN Up	HVC Down
7802	DCAF1	ENSTGUG00000004855	Ax Up			AreaX Up
1832	DCAF12	ENSTGUG00000001704				AreaX Up
4711	DCAF13	ENSTGUG00000012152						1
3006	DCAF17	ENSTGUG00000008201						1
10205	DCAF4	ENSTGUG00000011259	Ax Up
10254	DCAF5	ENSTGUG00000011473
12294	DCAF6	ENSTGUG00000013502		AreaX Down	LMAN Down
7218	DCAF7	ENSTGUG00000001963	Ax Up		LMAN Down
4504	DCBLD2	ENSTGUG00000013637			AreaX Up
13925	DCDC2	ENSTGUG00000006389			LMAN Up
13368	DCK	ENSTGUG00000001636
11214	DCLK3	ENSTGUG00000005698			HVC Down,LMAN Down,RA Down	AreaX Up,RA Down	RA Down
4171	DCLRE1C	ENSTGUG00000002342		AreaX Down
14107	DCN	ENSTGUG00000008178	Ax Down	HVC Up,LMAN Up,RA Up	HVC Up,LMAN Up,RA Up	AreaX Down
8787	DCP1A	ENSTGUG00000006820			LMAN Down	AreaX Up
51	DCP2	ENSTGUG00000001035
351	DCPS	ENSTGUG00000000833						1
4713	DCSTAMP	ENSTGUG00000012176
12905	DCT	ENSTGUG00000011227
10712	DCTD	ENSTGUG00000006536	Ax Down
13597	DCTN3	ENSTGUG00000001729	HVC LMAN Up			AreaX Down
8518	DCTN4	ENSTGUG00000000845
10572	DCTN6	ENSTGUG00000001779						1
10011	DCUN1D1	ENSTGUG00000010517					RA Up
12877	DCUN1D2	ENSTGUG00000009237				AreaX Up
7750	DCUN1D3	ENSTGUG00000009211
5050	DCUN1D5	ENSTGUG00000012725
9230	DD1CR	ENSTGUG00000008568		HVC Down
341	DDA1	ENSTGUG00000015918	Ax Up
14195	DDAH1	ENSTGUG00000006443	Ax Down	HVC Down		LMAN Up	AreaX Down
8744	DDB1	ENSTGUG00000006414
9790	DDB2	ENSTGUG00000010493
1039	DDHD2	ENSTGUG00000004804			LMAN Up,RA Up	AreaX Down	AreaX Down
12133	DDO	ENSTGUG00000012065
6529	DDOST	ENSTGUG00000002085				AreaX Down		1
12536	DDRGK1	ENSTGUG00000010991
12733	DDX1	ENSTGUG00000013096		HVC Up				1
3948	DDX11	ENSTGUG00000012673
11248	DDX18	ENSTGUG00000011611
9371	DDX27	ENSTGUG00000005649
1132	DDX31	ENSTGUG00000005142
4763	DDX3X	ENSTGUG00000006442						1
7996	DDX41	ENSTGUG00000000413
9172	DDX46	ENSTGUG00000001260	Ra Down				AreaX Up
11116	DDX47	ENSTGUG00000009385
13614	DDX5	ENSTGUG00000004622	Ax Up			AreaX Up	AreaX Up
2005	DDX51	ENSTGUG00000010243
6522	DDX52	ENSTGUG00000008303				AreaX Up		1
1051	DDX55	ENSTGUG00000005302				AreaX Up
2426	DDX6
1625	DEAF1	ENSTGUG00000007185
4671	DECR1	ENSTGUG00000011815
844	DECR2	ENSTGUG00000003772			LMAN Up
10197	DEGS1	ENSTGUG00000004024						1
10917	DEGS2	ENSTGUG00000012750
3880	DEK	ENSTGUG00000006271				AreaX Up		1
14181	DENND1A	ENSTGUG00000007024	LMAN Up					1
7742	DENND1B	ENSTGUG00000004323			LMAN Up	AreaX Up
11488	DENND2A	ENSTGUG00000011656	Ax Up	AreaX Up,HVC Up	HVC Up,LMAN Up		RA Up
662	DENND2C	ENSTGUG00000001005		HVC Up	LMAN Up
9541	DENND4A	ENSTGUG00000009220	Ra Down		RA Down	RA Down		1
12145	DENND4C	ENSTGUG00000004350	Ax Up		LMAN Down	AreaX Up
8901	DENND6A	ENSTGUG00000007311
4129	DENND6B	ENSTGUG00000016228				AreaX Down
8238	DENR	ENSTGUG00000005674						1
10949	DEPDC1	ENSTGUG00000010258	Ax Up
12002	DEPDC1B	ENSTGUG00000002670
9308	DEPDC5	ENSTGUG00000009850					AreaX Down
3592	DEPDC7	ENSTGUG00000004967		HVC Up,RA Up		AreaX Down	AreaX Down	1
12710	DEPTOR	ENSTGUG00000012381			LMAN Down			1
3983	DERA	ENSTGUG00000012393			HVC Up,LMAN Up				1			1
12694	DERL1	ENSTGUG00000012415
7535	DERL2	ENSTGUG00000004222				AreaX Up
9029	DERL3	ENSTGUG00000010283			LMAN Down
11171	DESI1	ENSTGUG00000009879			LMAN Up
10715	DESI2	ENSTGUG00000008289	Ax Up		AreaX Up	AreaX Up	AreaX Up
9300	DET1	ENSTGUG00000008339
885	DFFA	ENSTGUG00000003289																1	1					1	1
14513	DFFB	ENSTGUG00000002721				AreaX Up
1858	DGCR2	ENSTGUG00000008905
670	DGCR8	ENSTGUG00000015500			AreaX Up
569	DGKD	ENSTGUG00000007464
14198	DGKE	ENSTGUG00000009524
14113	DGKZ	ENSTGUG00000010647	Ax Up			AreaX Up,RA Down	AreaX Up	1
10722	DGLUCY	ENSTGUG00000012521	Ax Up		LMAN Down	AreaX Up		1
9013	DGUOK	ENSTGUG00000001082
10761	DHCR24	ENSTGUG00000009490	HVC LMAN Up		LMAN Down
8349	DHCR7	ENSTGUG00000005254	Ax Down	HVC Up	HVC Up,LMAN Up	AreaX Down	AreaX Down
102	DHDDS	ENSTGUG00000001032			LMAN Up	AreaX Down
8813	DHRS11	ENSTGUG00000008041			LMAN Up	LMAN Up
12948	DHRS12	ENSTGUG00000012073	Ax Up		LMAN Down	AreaX Up	AreaX Up
8411	DHRS3	ENSTGUG00000002492			HVC Up
11167	DHRS7	ENSTGUG00000013000					RA Up
8595	DHRS7B	ENSTGUG00000007489
89	DHRS7C	ENSTGUG00000007534
8201	DHTKD1	ENSTGUG00000002175
4366	DHX29	ENSTGUG00000002464
1607	DHX30	ENSTGUG00000000112		LMAN Down
4287	DHX32
7529	DHX33	ENSTGUG00000004226
8195	DHX35	ENSTGUG00000004620		HVC Up	HVC Up,LMAN Up	AreaX Down	RA Up
10591	DHX36	ENSTGUG00000011317						1
936	DHX37	ENSTGUG00000004953
14177	DHX38	ENSTGUG00000008196
8717	DHX40	ENSTGUG00000007512
11937	DHX57	ENSTGUG00000002076
7397	DHX8	ENSTGUG00000002881
8467	DIABLO	ENSTGUG00000006181
10832	DICER1	ENSTGUG00000012658				AreaX Up
5490	DIMT1	ENSTGUG00000002749
10736	DIO1	ENSTGUG00000009348			LMAN Down
9082	DIP2B	ENSTGUG00000003412
9269	DIP2C	ENSTGUG00000000783			LMAN Down	AreaX Up	AreaX Up
1870	DIPK1A				HVC Up	HVC Up
7813	DIPK1B	ENSTGUG00000006021		AreaX Up	LMAN Up
4114	DIPK1C	ENSTGUG00000009165				AreaX Up	AreaX Up
8788	DIRAS2	ENSTGUG00000000429	Ra Down		LMAN Up,RA Down	LMAN Up,RA Down	AreaX Down	1
12920	DIS3	ENSTGUG00000012500	Ax Up			AreaX Up
2420	DIS3L	ENSTGUG00000009315
10234	DISP1	ENSTGUG00000002654
8562	DISP3	ENSTGUG00000002310
9686	DIXDC1	ENSTGUG00000000315
3281	DKK2	ENSTGUG00000003934	Ax Up		RA Down	AreaX Up
8870	DKK3	ENSTGUG00000016109	Ax Down			AreaX Down	RA Up
2509	DLAT	ENSTGUG00000000308			LMAN Up			1
11709	DLC1	ENSTGUG00000007345	Ax Down				RA Up
2520	DLD	ENSTGUG00000003229		HVC Up,LMAN Up	LMAN Up
8666	DLG5	ENSTGUG00000006471				AreaX Up	AreaX Up
3730	DLGAP5	ENSTGUG00000013075							1	1	1				1	1	1
10933	DLK1	ENSTGUG00000012776	Ax Up	LMAN Up	LMAN Up	AreaX Up	AreaX Up
10606	DLK2	ENSTGUG00000009102		AreaX Down,HVC Down	AreaX Down,HVC Down,LMAN Down	HVC Up
13985	DLL1	ENSTGUG00000009780
3204	DLST	ENSTGUG00000012171			LMAN Up			1
14046	DLX6	ENSTGUG00000001642	Ax Up	HVC Down	LMAN Down	AreaX Up	AreaX Up	1
10503	DMAP1	ENSTGUG00000007598						1
13469	DMBX1	ENSTGUG00000008353
11286	DMC1	ENSTGUG00000010380			LMAN Down
1422	DMGDH	ENSTGUG00000003802				AreaX Down
10522	DMRT3	ENSTGUG00000005521
13217	DMTF1	ENSTGUG00000002365		HVC Down	HVC Down,LMAN Down
1287	DNA2	ENSTGUG00000003702		HVC Down	HVC Down,LMAN Down
8060	DNAAF1	ENSTGUG00000006729				AreaX Up
8458	DNAAF4	ENSTGUG00000006467
1180	DNAAF5	ENSTGUG00000008484
1361	DNAH1
1015	DNAH10								1						1			1	1	1				1	1	1
742	DNAH3	ENSTGUG00000009160							1			1
13966	DNAJA1	ENSTGUG00000001446	Ax Down					1
6629	DNAJA2	ENSTGUG00000008817	Ax Down		LMAN Up	AreaX Down		1
2476	DNAJA3	ENSTGUG00000003896			RA Up
1037	DNAJA4	ENSTGUG00000003285					RA Up	1
2071	DNAJB11	ENSTGUG00000006786						1
4192	DNAJB14	ENSTGUG00000003488
10047	DNAJB4	ENSTGUG00000006835				AreaX Up		1
10270	DNAJB9	ENSTGUG00000005595			LMAN Up	RA Down
2515	DNAJC1	ENSTGUG00000001209
2798	DNAJC10	ENSTGUG00000009565	Ax Up	AreaX Up	AreaX Up	AreaX Up
7248	DNAJC11	ENSTGUG00000002575
7920	DNAJC12	ENSTGUG00000003471
3589	DNAJC13	ENSTGUG00000004305	Ax Up			AreaX Up
6635	DNAJC16	ENSTGUG00000017133			LMAN Up
6849	DNAJC17	ENSTGUG00000006661						1
7843	DNAJC18	ENSTGUG00000014636						1
2623	DNAJC2	ENSTGUG00000002792
1085	DNAJC21	ENSTGUG00000001971			LMAN Up			1
11242	DNAJC24	ENSTGUG00000004808
12405	DNAJC25	ENSTGUG00000001277
4865	DNAJC27
9047	DNAJC5	ENSTGUG00000007151
3409	DNAJC6	ENSTGUG00000010011	Ax Down				AreaX Down	1
8124	DNAJC7	ENSTGUG00000002483						1
7280	DNAJC8	ENSTGUG00000000890
7898	DNAJC9	ENSTGUG00000004637
2926	DNAL1	ENSTGUG00000011213
3741	DNAL4	ENSTGUG00000010285
5939	DNASE1L3	ENSTGUG00000007451
6435	DNASE2B	ENSTGUG00000006605
8992	DND1	ENSTGUG00000001574
1544	DNM1	ENSTGUG00000003768	Ax Down			AreaX Down	AreaX Down
3938	DNM1L	ENSTGUG00000011505	Ra Up
3483	DNPEP	ENSTGUG00000006003				AreaX Down
13492	DNTT	ENSTGUG00000009071
12370	DOK7	ENSTGUG00000010345	Ax Up		AreaX Up,HVC Up	AreaX Up,RA Down	RA Down
1444	DOLK	ENSTGUG00000004256
4687	DONSON
12475	DOP1A	ENSTGUG00000012553
7171	DPAGT1	ENSTGUG00000000002			LMAN Up			1
9627	DPCD	ENSTGUG00000009967
8118	DPEP2	ENSTGUG00000007049
1663	DPH5	ENSTGUG00000005034			LMAN Up
10385	DPH6	ENSTGUG00000011764
2763	DPH7	ENSTGUG00000002695	Ax Up		RA Up
13071	DPM1	ENSTGUG00000008645
8695	DPM2	ENSTGUG00000003552
3426	DPP4	ENSTGUG00000006807	Ax Up		LMAN Down	AreaX Up	AreaX Up
2877	DPP7	ENSTGUG00000002295	Ra Down
9527	DPP8	ENSTGUG00000009145	Ax Up			AreaX Up
8384	DPP9	ENSTGUG00000000796	LMAN Up
13178	DPT	ENSTGUG00000013432			LMAN Up
8524	DPY19L3	ENSTGUG00000009029	Ax Down					1
4686	DPY19L4	ENSTGUG00000011910				AreaX Up
10686	DPY30	ENSTGUG00000008482						1
2400	DPYSL3	ENSTGUG00000000047	Ax Down	AreaX Down,LMAN Up,RA Down	LMAN Up,RA Down
8974	DR1	ENSTGUG00000005923			LMAN Down	AreaX Up
11463	DRAM1	ENSTGUG00000011306
7140	DRAM2	ENSTGUG00000001400	Ax Up					1
8553	DRAXIN	ENSTGUG00000002343	LMAN Up, Ra Down	HVC Down	HVC Down		RA Down
8646	DRC3	ENSTGUG00000007283			HVC Up,LMAN Up													1						1
342	DRC7	ENSTGUG00000004909						1	1	1	1				1	1	1	1	1	1				1	1	1
14570	DRD1	ENSTGUG00000000340	Ax Up		AreaX Up,LMAN Down	AreaX Up,LMAN Down	AreaX Up
9648	DRD2	ENSTGUG00000000255	Ax Up	AreaX Up		AreaX Up	AreaX Up
12161	DRD3	ENSTGUG00000013405	Ax Down	HVC Up,RA Up			RA Up	1
6110	DRD5	ENSTGUG00000009908	Ax Up	AreaX Up	LMAN Down	AreaX Up,LMAN Down	AreaX Up		1	1		1	1
14114	DRG1	ENSTGUG00000009759
1584	DRG2	ENSTGUG00000007245		HVC Up
1608	DRP2	ENSTGUG00000006639
12712	DSCC1	ENSTGUG00000012379
12091	DSE	ENSTGUG00000011943		AreaX Up	AreaX Up	AreaX Up
4479	DSG2	ENSTGUG00000010683			HVC Up,LMAN Down
2748	DSTN	ENSTGUG00000005998				AreaX Down	AreaX Down
5779	DSTYK
10012	DTD1	ENSTGUG00000005772
13409	DTD2	ENSTGUG00000011886		HVC Up	LMAN Up
13365	DTHD1	ENSTGUG00000009149
10398	DTL	ENSTGUG00000003109
13254	DTNBP1	ENSTGUG00000006035	Ax Down				RA Up	1
1794	DTWD1	ENSTGUG00000007331		AreaX Up
10769	DTX4	ENSTGUG00000007144	Ax Down
1995	DTYMK	ENSTGUG00000005937
764	DUOX2	ENSTGUG00000004765
7928	DUS1L	ENSTGUG00000003700
8110	DUS2	ENSTGUG00000007016
7584	DUS3L	ENSTGUG00000001021
14322	DUS4L	ENSTGUG00000003124
1189	DUSP1	ENSTGUG00000000299		AreaX Up	LMAN Up	AreaX Down		1
10248	DUSP10	ENSTGUG00000002705
13493	DUSP11	ENSTGUG00000009050
9404	DUSP12	ENSTGUG00000013360
9190	DUSP15	ENSTGUG00000006604		RA Up	LMAN Up	AreaX Down		1
7346	DUSP16	ENSTGUG00000012708			HVC Up		RA Up
851	DUSP19	ENSTGUG00000011298				AreaX Down
3914	DUSP22	ENSTGUG00000002152	Ax Up
12301	DUSP27	ENSTGUG00000013509
3091	DUSP3	ENSTGUG00000002946	Ax Down		LMAN Up	AreaX Down	AreaX Down
10986	DUSP4	ENSTGUG00000004821		AreaX Down	HVC Down,LMAN Down			1
9917	DUSP5	ENSTGUG00000010605						1
6348	DUSP6	ENSTGUG00000008053						1
7476	DUSP7	ENSTGUG00000006028		HVC Down	LMAN Down
9865	DVL3	ENSTGUG00000010112	Ax Up					1
7812	DYDC1	ENSTGUG00000006165	Ax Down
6158	DYNC1H1	ENSTGUG00000012793	Ax Down		LMAN Up
3537	DYNC1LI1	ENSTGUG00000003697
8758	DYNC1LI2	ENSTGUG00000009746	Ax Down				RA Up
10447	DYNC2LI1	ENSTGUG00000003662
8862	DYNLL2	ENSTGUG00000008415		HVC Up	LMAN Up
7626	DYNLRB1	ENSTGUG00000003567
13328	DYNLT1	ENSTGUG00000011060
12640	DYNLT3	ENSTGUG00000006777			HVC Up
12557	DYRK1A	ENSTGUG00000004960	Ax Up			AreaX Up
10425	DYRK2	ENSTGUG00000006720				AreaX Up
7303	DYRK3	ENSTGUG00000001091				AreaX Up
9983	DZANK1	ENSTGUG00000005864
3879	E2F3	ENSTGUG00000006335
7559	E2F4	ENSTGUG00000005417					RA Down
4645	E2F5	ENSTGUG00000011713
12728	E2F6	ENSTGUG00000013076
10558	E2F7	ENSTGUG00000007515			LMAN Down
1283	E2F8	ENSTGUG00000015857							1						1
11030	EAF1	ENSTGUG00000003944						1
5504	EAF2	ENSTGUG00000004411	Ax Down
3115	EAPP	ENSTGUG00000011919			LMAN Down			1
1938	EARS2	ENSTGUG00000006015						1
12578	EBAG9	ENSTGUG00000012252						1
10095	EBNA1BP2	ENSTGUG00000007072			LMAN Down			1
10697	ECHDC2	ENSTGUG00000009091	LMAN Up, Ra Down			RA Up	RA Up
9284	ECHDC3	ENSTGUG00000002150
2451	ECI1	ENSTGUG00000004207				AreaX Down
11475	ECI2	ENSTGUG00000002230					RA Up
10142	ECT2	ENSTGUG00000010794
14006	EDARADD	ENSTGUG00000010389	Ax Up		AreaX Up,LMAN Up	AreaX Up,HVC Down	HVC Down
7441	EDC3	ENSTGUG00000004007
533	EDC4	ENSTGUG00000005312
2642	EDEM1	ENSTGUG00000010316				AreaX Up	AreaX Up
8017	EDEM2	ENSTGUG00000003813
1529	EDEM3	ENSTGUG00000003798						1
10077	EDF1	ENSTGUG00000002446
11452	EDN1	ENSTGUG00000005833
7257	EDN2	ENSTGUG00000000822
14246	EDN3	ENSTGUG00000008004				AreaX Up	AreaX Up
10466	EDNRA	ENSTGUG00000002625	Ax Down	LMAN Up	LMAN Up	LMAN Up
5988	EDNRB	ENSTGUG00000012574
9531	EDNRB2	ENSTGUG00000005425		LMAN Up
4110	EDRF1	ENSTGUG00000011472				RA Down		1
3468	EEA1	ENSTGUG00000008213
386	EED	ENSTGUG00000012982
12493	EEF1A1	ENSTGUG00000012670						1
8969	EEF1A2	ENSTGUG00000007419						1
12995	EEF1AKMT1	ENSTGUG00000011337
3046	EEF1AKMT2	ENSTGUG00000011451
8041	EEF1AKNMT	ENSTGUG00000017274
9921	EEF1B2	ENSTGUG00000009931
3900	EEF1E1-BLOC1S5	ENSTGUG00000002373
600	EEF2	ENSTGUG00000001004	Ax Down		LMAN Up	AreaX Down		1
9373	EEF2K	ENSTGUG00000009003
8996	EEFSEC	ENSTGUG00000007895
10259	EFCAB1	ENSTGUG00000001491	Ax Up
10630	EFCAB14	ENSTGUG00000008408			AreaX Up,LMAN Up
3400	EFCAB7	ENSTGUG00000009906
9680	EFEMP1	ENSTGUG00000006870
3466	EFHB	ENSTGUG00000003223							1	1	1				1	1	1	1	1	1				1	1	1
5353	EFHC1	ENSTGUG00000013278							1	1					1	1		1	1					1	1
13587	EFHD1	ENSTGUG00000007243	Ra Up	AreaX Up,LMAN Up	LMAN Up	RA Up	RA Up
7169	EFNA5	ENSTGUG00000000956		AreaX Down			AreaX Up
13153	EFNB2	ENSTGUG00000010804	HVC LMAN Up		LMAN Down	HVC Up
311	EFTUD2	ENSTGUG00000002065
3727	EGF	ENSTGUG00000004206						1
7807	EGFL7	ENSTGUG00000006050
1194	EGFLAM	ENSTGUG00000002114					RA Up
10461	EGLN3	ENSTGUG00000011917				LMAN Up
9599	EGR1	ENSTGUG00000000003		AreaX Down,HVC Down,LMAN Down	LMAN Down		RA Down	1
10056	EHD4	ENSTGUG00000010994	Ax Down
9653	EHF	ENSTGUG00000010040
11174	EIF1B	ENSTGUG00000004677	Ax Down	AreaX Down	LMAN Up			1
13451	EIF2A	ENSTGUG00000011386
7023	EIF2AK1	ENSTGUG00000008807						1
4681	EIF2AK3	ENSTGUG00000010877	Ax Up
10328	EIF2AK4	ENSTGUG00000011608				AreaX Up
1038	EIF2B1	ENSTGUG00000005283	Ax Up
10574	EIF2B2	ENSTGUG00000012191			LMAN Up		RA Up
6372	EIF2B3	ENSTGUG00000007774
2663	EIF2B5	ENSTGUG00000010097
267	EIF2D
10307	EIF2S1	ENSTGUG00000011542	Ax Down
6851	EIF2S2	ENSTGUG00000003689	Ax Down		LMAN Up	AreaX Down		1
12675	EIF2S3	ENSTGUG00000007233	Ax Down			AreaX Down		1
2944	EIF3A	ENSTGUG00000011093						1
1353	EIF3B	ENSTGUG00000008140
11377	EIF3D	ENSTGUG00000010728
4720	EIF3E	ENSTGUG00000012216	Ax Up
1694	EIF3F	ENSTGUG00000007105
4731	EIF3H	ENSTGUG00000012302
1067	EIF3I	ENSTGUG00000001395						1
2609	EIF3J	ENSTGUG00000009878
6242	EIF3L	ENSTGUG00000010488				AreaX Down		1
6767	EIF3M	ENSTGUG00000004912
9964	EIF4A2	ENSTGUG00000010452	HVC LMAN Up					1
6499	EIF4A3	ENSTGUG00000002132
11284	EIF4E	ENSTGUG00000003296	Ax Down					1
[truncated: 6,297 more rows]
